# Supplementary material for: C–H functionalization of 2-alkyl tryptamines: direct assembly of azepino[4,5- b ]indoles and total synthesis of ngouniensines
Source: Royal Society of Chemistry journal article supplement (doi:10.1039/d4sc02802c), 2024-01-01
Supplement: d4sc02802c1.pdf [file d4sc02802c1.pdf]

*Supporting information for*

**C-H functionalization of 2-alkyl tryptamines: direct assembly of  
azepino[4,5-*b*]indoles and total synthesis of ngouniensines**

Kejing Xie, Zeyuan Shen, Peng Cheng, Haoxiang Dong, Zhi-Xiang Yu\* and Liansuo Zu\*

---

## Table of Contents

|                                                                                   |    |
|-----------------------------------------------------------------------------------|----|
| 1. Materials and Methods.....                                                     | 3  |
| 2. Synthesis of Tryptamine Derivatives <b>2</b> .....                             | 4  |
| 3. Synthesis of Azepino[4,5-b]indoles <b>4</b> and Alkene <b>5</b> .....          | 8  |
| 4. Synthesis of Exocyclic Alkenes <b>6</b> and Ngouniensines .....                | 17 |
| 5. Synthesis of Tryptamine Derivative <b>8</b> and Oxindole <b>9</b> .....        | 25 |
| 6. NMR Spectra .....                                                              | 27 |
| 7. X-Ray Structures of <b>4a</b> and Derivatives of <b>4l</b> and <b>4t</b> ..... | 76 |
| 8. Computational Studies .....                                                    | 79 |

---

## 1. Materials and Methods

Unless stated otherwise, all solvents and commercially available reagents were used as received without further purification. Reaction temperatures were controlled using an IKA magnetic temperature modulator.

Thin layer chromatography (TLC) was conducted on plates (GF254) supplied by Yantai Chemicals (China) and visualized using UV (254nm). Silica gel (200-300 mesh) supplied by Tsingtao Haiyang Chemicals (China) was used for flash column chromatography.

All NMR spectra were recorded on Bruker AVANCE III HD 400MHz instruments and are calibrated using residual undeuterated solvent ( $\text{CHCl}_3$  at 7.26 ppm  $^1\text{H}$  NMR, 77.16 ppm  $^{13}\text{C}$  NMR;  $\text{CH}_3\text{OH}$  at 3.31 ppm  $^1\text{H}$  NMR, 49.00 ppm  $^{13}\text{C}$  NMR; DMSO at 2.50 ppm  $^1\text{H}$  NMR, 39.52  $^{13}\text{C}$  NMR).

Data for  $^1\text{H}$  NMR spectra were reported as follows: chemical shift ( $\delta$  ppm), multiplicity, coupling constant (Hz) and integration. The following abbreviations were used to explain multiplicities: s = singlet, d = doublet, t = triplet, q = quartet, p = pentet, m = multiplet, br = broad.  $^{13}\text{C}$  NMR spectra are reported in terms of chemical shift.

High resolution mass spectrometry (HRMS) data were obtained on a Xevo G2-XS QToF Quadrupole Time-of-Flight Mass Spectrometry by electrospray ionization (ESI) in the positive ion mode from Waters Corporation.

---

## 2. Synthesis of Tryptamine Derivatives 2

Compound **2k** and **2l** were prepared by following the literature procedure<sup>1</sup>.

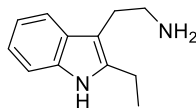

### 2-(2-ethyl-1H-indol-3-yl)ethan-1-amine (**2k**)

Light brown oil. Characterization data:

**<sup>1</sup>H NMR** (400 MHz, Chloroform-*d*)  $\delta$  8.03 (br, 1H), 7.53 (d,  $J$  = 7.6 Hz, 1H), 7.31 – 7.23 (m, 1H), 7.10 (m, 2H), 2.99 (s, 2H), 2.88 (t,  $J$  = 6.4 Hz, 2H), 2.78 (q,  $J$  = 7.6 Hz, 2H), 1.96 (br, 2H), 1.28 (t,  $J$  = 7.6 Hz, 3H).

**<sup>13</sup>C NMR** (100 MHz, Chloroform-*d*)  $\delta$  137.9, 135.4, 128.8, 121.2, 119.3, 118.3, 110.5, 108.2, 42.7, 28.1, 19.5, 14.6.

**HRMS-ESI** ( $m/z$ ):  $[M + H]^+$  calculated for C<sub>12</sub>H<sub>17</sub>N<sub>2</sub><sup>+</sup>, 189.1386, found 189.1382.

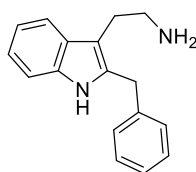

### 2-(2-benzyl-1H-indol-3-yl)ethan-1-amine (**2l**)

Brown solid. Characterization data:

**<sup>1</sup>H NMR** (400 MHz, Chloroform-*d*)  $\delta$  7.85 (br, 1H), 7.56 (d,  $J$  = 7.1 Hz, 1H), 7.30 (t,  $J$  = 7.2 Hz, 2H), 7.26 – 7.15 (m, 4H), 7.14 – 7.05 (m, 2H), 4.12 (s, 2H), 3.02 – 2.95 (m, 2H), 2.92 (dd,  $J$  = 10.0, 3.7 Hz, 2H), 1.40 (br, 2H).

**<sup>13</sup>C NMR** (100 MHz, Chloroform-*d*)  $\delta$  138.9, 135.7, 134.2, 128.9, 128.8, 126.8, 121.5, 119.4, 118.6, 110.7, 110.2, 43.0, 32.5, 28.6.

**HRMS-ESI** ( $m/z$ ):  $[M + H]^+$  calculated for C<sub>17</sub>H<sub>19</sub>N<sub>2</sub><sup>+</sup>, 251.1543, found 251.1544.

Compound **2m-2r** were prepared by Fischer indolization by following the literature procedure<sup>2</sup>.

---

<sup>1</sup> I. Fleming, J. Harley-Mason, *J. Chem. Soc. C.*, **1966**, 425-425.

<sup>2</sup> R. Amaradhi, A. Banik, S. Mohammed, V. Patro, A. Rojas, W. Wang, D. R. Motati, R. Dingledine, T. Ganesh, *J. Med. Chem.* **2020**, 63, 1032–1050.

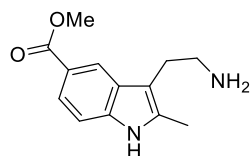

**methyl 3-(2-aminoethyl)-2-methyl-1H-indole-5-carboxylate (2m)**

Brown solid. Characterization data:

**<sup>1</sup>H NMR** (400 MHz, Chloroform-*d*)  $\delta$  8.68 (br, 1H), 8.26 (s, 1H), 7.81 (d,  $J$  = 8.5 Hz, 1H), 7.23 (d,  $J$  = 8.5 Hz, 1H), 3.91 (s, 3H), 2.97 (t,  $J$  = 6.7 Hz, 2H), 2.85 (t,  $J$  = 6.7 Hz, 2H), 2.37 (s, 3H), 1.55 (br, 2H).

**<sup>13</sup>C NMR** (100 MHz, Chloroform-*d*)  $\delta$  168.6, 138.2, 133.5, 128.6, 122.6, 121.2, 120.9, 110.6, 110.0, 51.9, 42.8, 28.4, 11.8.

**HRMS-ESI** ( $m/z$ ):  $[M + H]^+$  calculated for C<sub>13</sub>H<sub>17</sub>N<sub>2</sub>O<sub>2</sub><sup>+</sup>, 233.1285, found 233.1296.

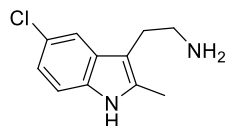

**2-(5-chloro-2-methyl-1H-indol-3-yl)ethan-1-amine (2n)**

Light yellow solid. Characterization data:

**<sup>1</sup>H NMR** (400 MHz, Chloroform-*d*)  $\delta$  9.07 (br, 1H), 7.45 (d,  $J$  = 2.0 Hz, 1H), 7.12 – 6.98 (m, 2H), 2.95 (t,  $J$  = 6.7 Hz, 2H), 2.79 (t,  $J$  = 6.7 Hz, 2H), 2.30 (s, 3H), 1.32 (br, 2H).

**<sup>13</sup>C NMR** (100 MHz, Chloroform-*d*)  $\delta$  133.8, 129.9, 124.5, 120.8, 117.3, 111.3, 108.6, 108.5, 42.5, 28.1, 11.6.

**HRMS-ESI** ( $m/z$ ):  $[M + H]^+$  calculated for C<sub>11</sub>H<sub>14</sub>N<sub>2</sub>Cl<sup>+</sup>, 209.0840, found 209.0850.

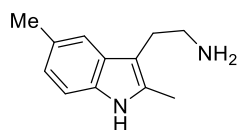

**2-(2,5-dimethyl-1H-indol-3-yl)ethan-1-amine (2o)**

Brown solid. Characterization data:

**<sup>1</sup>H NMR** (400 MHz, Chloroform-*d*)  $\delta$  8.08 (br, 1H), 7.31 (s, 1H), 7.14 (d,  $J$  = 8.2 Hz, 1H), 6.95 (d,  $J$  = 8.1 Hz, 1H), 2.98 (t,  $J$  = 6.7 Hz, 2H), 2.84 (t,  $J$  = 6.7 Hz, 2H), 2.46 (s, 3H), 2.36 (s, 3H), 1.29 (br, 2H).

**<sup>13</sup>C NMR** (100 MHz, Chloroform-*d*)  $\delta$  133.8, 132.0, 129.2, 128.3, 122.5, 117.9, 110.0, 108.7, 42.8, 28.5, 21.6, 11.8.

**HRMS-ESI** ( $m/z$ ):  $[M + H]^+$  calculated for C<sub>12</sub>H<sub>17</sub>N<sub>2</sub><sup>+</sup>, 189.1386, found 189.1382.

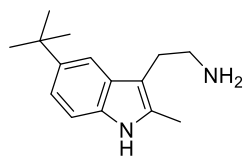

**2-(5-(tert-butyl)-2-methyl-1H-indol-3-yl)ethan-1-amine (2p)**

Brown solid. Characterization data:

**<sup>1</sup>H NMR** (400 MHz, Chloroform-*d*) δ 7.98 (br, 1H), 7.50 (m, 1H), 7.21 (m, 2H), 3.00 (t, *J* = 6.7 Hz, 2H), 2.87 (t, *J* = 6.7 Hz, 2H), 2.37 (s, 3H), 1.40 (s, 9H).

**<sup>13</sup>C NMR** (100 MHz, Chloroform-*d*) δ 142.2, 133.6, 132.0, 128.6, 119.2, 113.9, 109.8, 109.2, 42.8, 34.7, 32.1, 28.5, 11.9.

**HRMS-ESI** (*m/z*): [M + H]<sup>+</sup> calculated for C<sub>15</sub>H<sub>23</sub>N<sub>2</sub><sup>+</sup>, 231.1856, found 231.1863.

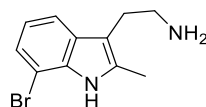

**2-(7-bromo-2-methyl-1H-indol-3-yl)ethan-1-amine (2q)**

Brown solid. Characterization data:

**<sup>1</sup>H NMR** (400 MHz, Chloroform-*d*) δ 8.23 (br, 1H), 7.44 (d, *J* = 7.8 Hz, 1H), 7.24 (s, 1H), 6.95 (t, *J* = 7.7 Hz, 1H), 2.96 (t, *J* = 6.6 Hz, 2H), 2.82 (t, *J* = 6.7 Hz, 2H), 2.42 (s, 3H), 1.47 (br, 2H).

**<sup>13</sup>C NMR** (100 MHz, Chloroform-*d*) δ 134.1, 132.8, 130.2, 123.4, 120.5, 117.3, 110.7, 104.1, 42.8, 28.7, 11.9.

**HRMS-ESI** (*m/z*): [M + H]<sup>+</sup> calculated for C<sub>11</sub>H<sub>14</sub>N<sub>2</sub>Br<sup>+</sup>, 253.0335, found 253.0335.

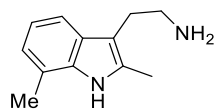

**2-(2,7-dimethyl-1H-indol-3-yl)ethan-1-amine (2r)**

Brown solid. Characterization data:

**<sup>1</sup>H NMR** (400 MHz, Chloroform-*d*) δ 7.96 (br, 1H), 7.37 (d, *J* = 7.8 Hz, 1H), 7.01 (t, *J* = 7.5 Hz, 1H), 6.93 (d, *J* = 7.1 Hz, 1H), 2.98 (t, *J* = 6.7 Hz, 2H), 2.87 (t, *J* = 6.7 Hz, 2H), 2.47 (s, 3H), 2.42 (s, 3H), 1.96 (br, 2H).

**<sup>13</sup>C NMR** (100 MHz, Chloroform-*d*) δ 134.9, 131.6, 128.4, 121.8, 119.5, 115.9, 109.6, 42.7, 28.3, 16.7, 11.9.

**HRMS-ESI** (*m/z*): [M + H]<sup>+</sup> calculated for C<sub>12</sub>H<sub>17</sub>N<sub>2</sub><sup>+</sup>, 189.1386, found 189.1382.

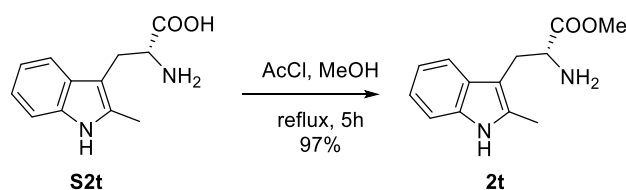

To a cooled solution (0 °C) of **S2t** (100 mg, 0.46 mmol) in MeOH (1.0 mL) was added acetyl chloride (125  $\mu$ L) dropwise over 15 mins. The mixture was heated to reflux for 5 hours and then cooled to room temperature. The mixture was concentrated under reduced pressure to afford the residue, which was basified with 3 mL  $\text{NH}_4\text{OH}$  and extracted with DCM (3 $\times$ 10 mL). The combined organic extracts were dried over anhydrous  $\text{Na}_2\text{SO}_4$ , and concentrated under reduced pressure to give compound **2t** (103.1 mg, 97% yield) as a light brown oil. Characterization data:

**$^1\text{H}$  NMR** (400 MHz, Chloroform-*d*)  $\delta$  8.05 (br, 1H), 7.52 (d,  $J$  = 7.1 Hz, 1H), 7.28 – 7.21 (m, 1H), 7.15 – 7.05 (m, 2H), 3.88 – 3.79 (m, 1H), 3.71 (s, 3H), 3.30 – 3.17 (m, 1H), 2.98 (dd,  $J$  = 14.2, 8.0 Hz, 1H), 2.36 (s, 3H), 1.53 (br, 2H).

**$^{13}\text{C}$  NMR** (100 MHz, Chloroform-*d*)  $\delta$  176.0, 135.4, 132.8, 128.9, 121.4, 119.5, 118.1, 110.4, 107.2, 55.5, 52.1, 30.2, 11.9.

**HRMS-ESI** ( $m/z$ ):  $[\text{M} + \text{H}]^+$  calculated for  $\text{C}_{13}\text{H}_{17}\text{N}_2\text{O}_2^+$ , 233.1285, found 233.1296.

Compound **2u** and **2w** were prepared by following the literature procedure.<sup>3</sup>

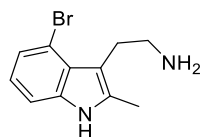

#### 2-(4-bromo-2-methyl-1H-indol-3-yl)ethan-1-amine (**2u**)

Brown solid. Characterization data:

**$^1\text{H}$  NMR** (400 MHz, Methanol-*d*<sub>4</sub>)  $\delta$  7.21 (d,  $J$  = 8.0 Hz, 1H), 7.09 (d,  $J$  = 7.6 Hz, 1H), 6.84 (t,  $J$  = 7.8 Hz, 1H), 3.05 (t,  $J$  = 7.4 Hz, 2H), 2.89 (t,  $J$  = 7.4 Hz, 2H), 2.36 (s, 3H).

**$^{13}\text{C}$  NMR** (100 MHz, Methanol-*d*<sub>4</sub>)  $\delta$  137.1, 134.1, 126.0, 122.7, 120.8, 112.2, 109.5, 108.0, 43.4, 27.0, 10.1.

**HRMS-ESI** ( $m/z$ ):  $[\text{M} + \text{H}]^+$  calculated for  $\text{C}_{11}\text{H}_{14}\text{N}_2\text{Br}^+$ , 253.0335, found 253.0335.

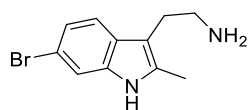

#### 2-(6-bromo-2-methyl-1H-indol-3-yl)ethan-1-amine (**2w**)

<sup>3</sup> M. Righi, F. Topi, S. Bartolucci, A. Bedini, G. Piersanti, G. Spadoni, *J. Org. Chem.* **2012**, 77, 6351–6357.

Brown solid. Characterization data:

**<sup>1</sup>H NMR** (400 MHz, Methanol-*d*<sub>4</sub>) δ 7.43 – 7.39 (m, 1H), 7.35 (d, *J* = 8.4 Hz, 1H), 7.07 (dd, *J* = 8.4, 1.5 Hz, 1H), 2.95 – 2.85 (m, 4H), 2.38 (s, 3H).

**<sup>13</sup>C NMR** (100 MHz, Methanol-*d*<sub>4</sub>) δ 136.6, 133.3, 127.4, 121.2, 118.3, 113.3, 112.9, 107.2, 41.3, 25.6, 10.0.

**HRMS-ESI** (*m/z*): [*M* + *H*]<sup>+</sup> calculated for C<sub>11</sub>H<sub>14</sub>N<sub>2</sub>Br, 253.0340, found 253.0335.

### 3. Synthesis of Azepino[4,5-*b*]indoles 4 and Alkene 5

General procedure:

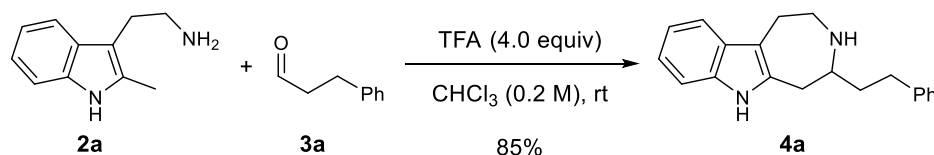

To a stirred solution of amine **2a** (34.8 mg, 0.2 mmol, 1.0 equiv.) and aldehyde **3a** (53.6 mg, 0.4 mmol, 2.0 equiv.) in CHCl<sub>3</sub> (1.0 mL) was added TFA (91.2 mg, 0.8 mmol, 4.0 equiv.) in one portion at room temperature. The mixture was stirred at room temperature for 24 hours and quenched with 10% aqueous Na<sub>2</sub>CO<sub>3</sub> (2 mL). The biphasic layers were separated, and the aqueous layer was extracted with DCM (3×10 mL). The combined organic layers were dried over anhydrous Na<sub>2</sub>SO<sub>4</sub> and concentrated under reduced pressure. The resulting residue was purified by flash column chromatography (silica gel, DCM: MeOH = 100:3) to afford azepino[4,5-*b*]indoles **4a** (49.4 mg, 85% yield) as a light brown solid.

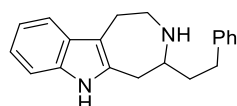

#### 4-phenethyl-1,2,3,4,5,6-hexahydroazepino[4,5-*b*]indole (**4a**)

Light brown solid, 49.4 mg, 85% yield. Characterization data:

**<sup>1</sup>H NMR** (400 MHz, Chloroform-*d*) δ 7.77 (br, 1H), 7.48 (d, *J* = 6.8 Hz, 1H), 7.37 – 7.18 (m, 6H), 7.18 – 7.07 (m, 2H), 3.42 (m, 1H), 3.05 – 2.72 (m, 8H), 2.41 (br, 1H), 1.95 – 1.78 (m, 2H).

**<sup>13</sup>C NMR** (100 MHz, Chloroform-*d*) δ 141.9, 134.8, 134.6, 129.2, 128.6, 128.5, 126.1, 121.1, 119.3, 117.7, 112.8, 110.4, 57.9, 49.1, 39.0, 37.9, 33.0, 27.5.

**HRMS-ESI** (*m/z*): [*M* + *H*]<sup>+</sup> calculated for C<sub>20</sub>H<sub>23</sub>N<sub>2</sub><sup>+</sup>, 291.1856, found 291.1882.

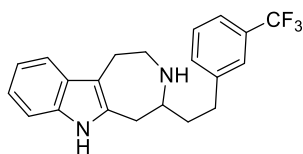

**4-(3-(trifluoromethyl)phenethyl)-1,2,3,4,5,6-hexahydroazepino[4,5-b]indole (4b)**

Brown solid, 50.9 mg, 71% yield. Characterization data:

**<sup>1</sup>H NMR** (400 MHz, Chloroform-*d*)  $\delta$  7.72 (br, 1H), 7.52 – 7.44 (m, 3H), 7.43 – 7.37 (m, 2H), 7.29 – 7.23 (m, 1H), 7.16 – 7.07 (m, 2H), 3.47 – 3.41 (m, 1H), 3.07 – 2.97 (m, 1H), 2.94 – 2.75 (m, 7H), 1.88 – 1.81 (m, 2H).

**<sup>13</sup>C NMR** (100 MHz, Chloroform-*d*)  $\delta$  142.9, 134.6, 134.5, 131.8, 130.77 (q,  $J$  = 31.9 Hz), 129.1, 128.9, 125.11 (q,  $J$  = 3.6 Hz), 124.3 (q,  $J$  = 270.7 Hz), 122.88 (q,  $J$  = 3.8 Hz), 121.1, 119.3, 117.7, 112.9, 110.3, 57.6, 49.0, 38.9, 38.3, 32.7, 27.8.

**<sup>19</sup>F NMR** (376 MHz, Chloroform-*d*)  $\delta$  -62.5.

**HRMS-ESI** ( $m/z$ ):  $[M + H]^+$  calculated for C<sub>21</sub>H<sub>22</sub>N<sub>2</sub>F<sub>3</sub><sup>+</sup>, 359.1730, found 359.1735.

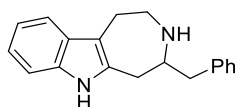

**4-benzyl-1,2,3,4,5,6-hexahydroazepino[4,5-b]indole (4c)**

Brown solid, 27.8 mg, 50% yield. Characterization data:

**<sup>1</sup>H NMR** (400 MHz, Chloroform-*d*)  $\delta$  7.69 (br, 1H), 7.48 – 7.43 (m, 1H), 7.37 – 7.31 (m, 2H), 7.29 – 7.22 (m, 4H), 7.14 – 7.05 (m, 2H), 3.38 – 3.31 (m, 1H), 3.21 – 3.13 (m, 1H), 3.03 – 2.78 (m, 7H).

**<sup>13</sup>C NMR** (100 MHz, Chloroform-*d*)  $\delta$  138.7, 134.6, 134.5, 129.4, 129.1, 128.9, 126.8, 121.2, 119.3, 117.8, 113.1, 110.4, 59.7, 49.5, 43.3, 36.9, 26.8.

**HRMS-ESI** ( $m/z$ ):  $[M + H]^+$  calculated for C<sub>19</sub>H<sub>21</sub>N<sub>2</sub><sup>+</sup>, 277.1699, found 277.1721.

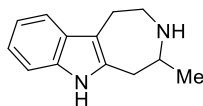

**4-methyl-1,2,3,4,5,6-hexahydroazepino[4,5-b]indole (4d)**

Brown solid, 34.6 mg, 87% yield. Characterization data:

**<sup>1</sup>H NMR** (400 MHz, Chloroform-*d*)  $\delta$  7.75 (br, 1H), 7.47 (d,  $J$  = 7.2 Hz, 1H), 7.27 (d,  $J$  = 7.5 Hz, 1H), 7.15 – 7.07 (m, 2H), 3.43 – 3.36 (m, 1H), 3.09 – 2.97 (m, 2H), 2.96 – 2.74 (m, 4H), 2.16 (br, 1H), 1.26 (d,  $J$  = 6.4 Hz, 3H).

**<sup>13</sup>C NMR** (100 MHz, Chloroform-*d*)  $\delta$  135.0, 134.7, 129.3, 121.1, 119.3, 117.7, 113.1, 110.4, 54.2, 49.6, 39.7, 27.5, 23.9.

**HRMS-ESI** ( $m/z$ ):  $[M + H]^+$  calculated for  $C_{13}H_{17}N_2^+$ , 201.1386, found 201.1405.

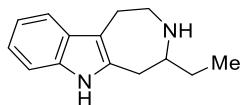

**4-ethyl-1,2,3,4,5,6-hexahydroazepino[4,5-b]indole (4e)**

Brown solid, 40.5 mg, 95% yield. Characterization data:

**$^1H$  NMR** (400 MHz, Chloroform-*d*)  $\delta$  7.83 (br, 1H), 7.50 – 7.42 (m, 1H), 7.28 – 7.25 (m, 1H), 7.16 – 7.05 (m, 2H), 3.47 – 3.38 (m, 1H), 3.32 (br, 1H), 3.04 – 2.98 (m, 1H), 2.95 – 2.77 (m, 5H), 1.63 – 1.54 (m, 2H), 1.02 (t,  $J = 7.4$  Hz, 3H).

**$^{13}C$  NMR** (100 MHz, Chloroform-*d*)  $\delta$  134.9, 134.7, 129.2, 121.1, 119.3, 117.7, 112.8, 110.4, 60.1, 49.2, 36.7, 29.9, 27.0, 11.1.

**HRMS-ESI** ( $m/z$ ):  $[M + H]^+$  calculated for  $C_{14}H_{19}N_2^+$ , 215.1543, found 215.1549.

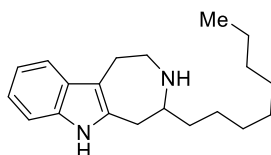

**4-heptyl-1,2,3,4,5,6-hexahydroazepino[4,5-b]indole (4f)**

White solid, 51.8 mg, 87% yield. Characterization data:

**$^1H$  NMR** (400 MHz, Chloroform-*d*)  $\delta$  7.85 (br, 1H), 7.46 (d,  $J = 7.2$  Hz, 1H), 7.31 – 7.22 (m, 1H), 7.15 – 7.07 (m, 2H), 3.91 – 3.55 (br, 1H), 3.51 – 3.40 (m, 1H), 3.06 – 3.00 (m, 1H), 2.98 – 2.83 (m, 5H), 1.62 – 1.54 (m, 2H), 1.46 – 1.37 (m, 2H), 1.36 – 1.24 (m, 10H), 0.90 (t,  $J = 6.5$  Hz, 3H).

**$^{13}C$  NMR** (100 MHz, Chloroform-*d*)  $\delta$  134.7, 129.1, 121.1, 119.3, 117.7, 112.7, 110.4, 58.6, 49.0, 36.8, 32.0, 29.8, 29.7, 29.4, 26.7, 26.6, 22.8, 14.2.

**HRMS-ESI** ( $m/z$ ):  $[M + H]^+$  calculated for  $C_{20}H_{31}N_2^+$ , 299.2482, found 299.2480.

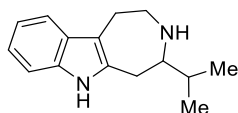

**4-isopropyl-1,2,3,4,5,6-hexahydroazepino[4,5-b]indole (4g)**

General procedure, with higher concentration and longer reaction time (0.25 mL  $CHCl_3$ , 48 hours).

Brown solid, 25.6 mg, 56% yield. Characterization data:

**$^1H$  NMR** (400 MHz, Chloroform-*d*)  $\delta$  7.74 (br, 1H), 7.46 (dd,  $J = 6.4, 2.4$  Hz, 1H), 7.32 – 7.23 (m, 1H), 7.16 – 7.05 (m, 2H), 3.46 – 3.40 (m, 1H), 3.04 – 2.74 (m, 5H),

2.72 – 2.66 (m, 1H), 2.03 (br, 1H), 1.86 – 1.75 (m, 1H), 1.02 (s, 3H), 1.00 (s, 3H).

**<sup>13</sup>C NMR** (100 MHz, Chloroform-*d*)  $\delta$  135.4, 134.8, 129.4, 121.0, 119.3, 117.7, 112.7, 110.3, 64.1, 49.7, 34.2, 34.0, 27.6, 19.2, 19.0.

**HRMS-ESI** (*m/z*): [M + H]<sup>+</sup> calculated for C<sub>15</sub>H<sub>21</sub>N<sub>2</sub><sup>+</sup>, 229.1699, found 229.1706.

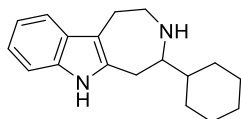

#### 4-cyclohexyl-1,2,3,4,5,6-hexahydroazepino[4,5-b]indole (4h)

General procedure, with higher concentration and longer reaction time (0.25 mL CHCl<sub>3</sub>, 48 hours).

Brown solid, 36.6 mg, 68% yield. Characterization data:

**<sup>1</sup>H NMR** (400 MHz, Chloroform-*d*)  $\delta$  7.75 (br, 1H), 7.51 – 7.40 (m, 1H), 7.32 – 7.21 (m, 2H), 7.17 – 7.04 (m, 2H), 3.48 – 3.38 (m, 1H), 3.04 – 2.76 (m, 5H), 2.73 – 2.67 (m, 1H), 2.30 (br, 1H), 1.85 – 1.76 (m, 4H), 1.74 – 1.66 (m, 1H), 1.52 – 1.42 (m, 1H), 1.33 – 1.07 (m, 5H).

**<sup>13</sup>C NMR** (100 MHz, Chloroform-*d*)  $\delta$  135.5, 134.8, 129.4, 121.0, 119.3, 117.7, 112.7, 110.3, 63.5, 49.6, 44.3, 34.5, 29.8, 29.5, 27.6, 26.8, 26.7, 26.7.

**HRMS-ESI** (*m/z*): [M + H]<sup>+</sup> calculated for C<sub>18</sub>H<sub>25</sub>N<sub>2</sub><sup>+</sup>, 269.2012, found 269.2027.

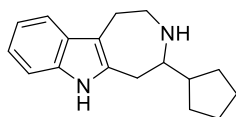

#### 4-cyclopentyl-1,2,3,4,5,6-hexahydroazepino[4,5-b]indole (4i)

General procedure, with higher concentration and longer reaction time (0.25 mL CHCl<sub>3</sub>, 48 hours).

Light brown solid, 36.4 mg, 72% yield. Characterization data:

**<sup>1</sup>H NMR** (400 MHz, Chloroform-*d*)  $\delta$  7.79 (br, 1H), 7.50 – 7.44 (m, 1H), 7.29 – 7.24 (m, 1H), 7.15 – 7.06 (m, 2H), 3.45 – 3.38 (m, 1H), 3.04 – 2.78 (m, 5H), 2.70 – 2.61 (m, 1H), 2.24 (br, 1H), 2.01 – 1.78 (m, 3H), 1.73 – 1.54 (m, 4H), 1.35 – 1.24 (m, 2H).

**<sup>13</sup>C NMR** (100 MHz, Chloroform-*d*)  $\delta$  135.1, 134.7, 129.2, 121.0, 119.2, 117.7, 112.7, 110.3, 64.1, 49.3, 45.6, 36.2, 30.5, 30.0, 27.2, 25.8, 25.7.

**HRMS-ESI** (*m/z*): [M + H]<sup>+</sup> calculated for C<sub>17</sub>H<sub>23</sub>N<sub>2</sub><sup>+</sup>, 255.1856, found 255.1872.

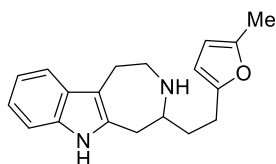

**4-(2-(5-methylfuran-2-yl)ethyl)-1,2,3,4,5,6-hexahydroazepino[4,5-b]indole (4j)**

Brown oil, 41.8 mg, 71% yield. Characterization data:

**<sup>1</sup>H NMR** (400 MHz, Chloroform-*d*)  $\delta$  7.80 (br, 1H), 7.46 (dd,  $J$  = 6.5, 1.9 Hz, 1H), 7.30 – 7.23 (m, 1H), 7.16 – 7.06 (m, 2H), 5.90 (d,  $J$  = 2.9 Hz, 1H), 5.88 – 5.83 (m, 1H), 3.47 – 3.38 (m, 1H), 3.05 – 2.84 (m, 6H), 2.79 – 2.69 (m, 2H), 2.25 (s, 3H), 1.91 – 1.85 (m, 2H).

**<sup>13</sup>C NMR** (100 MHz, Chloroform-*d*)  $\delta$  153.5, 150.6, 134.7, 134.5, 129.1, 121.2, 119.4, 117.7, 112.7, 110.4, 106.0, 106.0, 57.7, 48.7, 37.1, 35.1, 27.0, 25.2, 13.7.

**HRMS-ESI** ( $m/z$ ):  $[M + H]^+$  calculated for C<sub>19</sub>H<sub>23</sub>N<sub>2</sub>O<sup>+</sup>, 295.1805, found 295.1815.

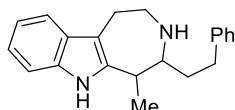

**5-methyl-4-phenethyl-1,2,3,4,5,6-hexahydroazepino[4,5-b]indole (4k)**

General procedure, with lower concentration and shorter reaction time (4.0 mL CHCl<sub>3</sub>, 6 hours). This reaction was carried out strictly under N<sub>2</sub>.

Brown oil, 51.6 mg, 85% yield, dr = 1:1. Characterization data:

isomer 1:

**<sup>1</sup>H NMR** (400 MHz, Chloroform-*d*)  $\delta$  7.68 (br, 1H), 7.49 – 7.43 (m, 1H), 7.32 – 7.25 (m, 3H), 7.24 – 7.17 (m, 3H), 7.15 – 7.06 (m, 2H), 3.44 – 3.36 (m, 1H), 3.08 – 3.02 (m, 1H), 3.00 – 2.66 (m, 6H), 1.87 – 1.69 (m, 2H), 1.27 (d,  $J$  = 7.1 Hz, 3H).

**<sup>13</sup>C NMR** (100 MHz, Chloroform-*d*)  $\delta$  142.1, 140.9, 134.6, 129.3, 128.6, 128.5, 126.1, 121.1, 119.3, 117.9, 111.5, 110.4, 61.0, 49.6, 40.1, 36.7, 33.6, 27.3, 13.4.

isomer 2:

**<sup>1</sup>H NMR** (400 MHz, Chloroform-*d*)  $\delta$  7.67 (br, 1H), 7.51 – 7.43 (m, 1H), 7.30 – 7.22 (m, 3H), 7.21 – 7.15 (m, 3H), 7.14 – 7.07 (m, 2H), 3.17 – 3.04 (m, 2H), 3.01 – 2.88 (m, 3H), 2.88 – 2.74 (m, 2H), 2.69 – 2.59 (m, 1H), 2.07 – 1.95 (m, 1H), 1.79 – 1.67 (m, 1H), 1.41 (d,  $J$  = 7.1 Hz, 3H).

**<sup>13</sup>C NMR** (100 MHz, Chloroform-*d*)  $\delta$  142.4, 138.8, 134.8, 129.2, 128.5, 128.5, 125.9, 120.9, 119.3, 117.8, 110.7, 110.4, 58.9, 42.5, 40.9, 34.1, 33.2, 26.9, 18.9.

**HRMS-ESI** ( $m/z$ ):  $[M + H]^+$  calculated for C<sub>21</sub>H<sub>25</sub>N<sub>2</sub><sup>+</sup>, 305.2012, found 305.2035.

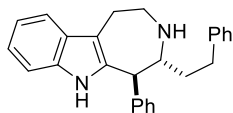

**4-phenethyl-5-phenyl-1,2,3,4,5,6-hexahydroazepino[4,5-b]indole (4l)**

General procedure, with lower concentration and shorter reaction time (4.0 mL  $\text{CHCl}_3$ , 12 hours). This reaction was carried out strictly under  $\text{N}_2$ .

Brown solid, 54.9 mg, 75% yield, dr = 10:1. Characterization data:

**$^1\text{H}$  NMR** (400 MHz, Chloroform-*d*)  $\delta$  7.59 – 7.51 (m, 1H), 7.41 – 7.30 (m, 4H), 7.29 – 7.22 (m, 2H), 7.22 – 7.05 (m, 8H), 4.09 (d,  $J = 7.7$  Hz, 1H), 3.51 – 3.37 (m, 1H), 3.28 – 3.19 (m, 1H), 3.17 – 3.06 (m, 2H), 3.06 – 2.95 (m, 1H), 2.89 – 2.79 (m, 1H), 2.71 – 2.60 (m, 1H), 1.98 (br, 1H), 1.79 – 1.71 (m, 2H).

**$^{13}\text{C}$  NMR** (100 MHz, Chloroform-*d*)  $\delta$  142.1, 141.3, 136.1, 134.9, 129.1, 129.0, 128.5, 128.4, 127.3, 125.9, 121.4, 119.2, 118.1, 112.5, 110.4, 62.1, 54.8, 46.9, 35.8, 32.6, 27.9.

**HRMS-ESI** ( $m/z$ ):  $[\text{M} + \text{H}]^+$  calculated for  $\text{C}_{26}\text{H}_{27}\text{N}_2^+$ , 367.2169, found 367.2173.

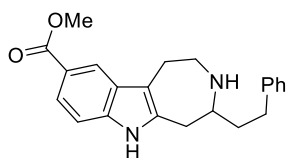

**methyl 4-phenethyl-1,2,3,4,5,6-hexahydroazepino[4,5-b]indole-9-carboxylate (4m)**

Light brown solid, 59.0 mg, 85% yield. Characterization data:

**$^1\text{H}$  NMR** (400 MHz, Chloroform-*d*)  $\delta$  8.23 (s, 1H), 8.19 (br, 1H), 7.82 (d,  $J = 8.4$  Hz, 1H), 7.33 – 7.14 (m, 6H), 3.92 (s, 3H), 3.46 – 3.34 (m, 1H), 3.06 – 2.96 (m, 1H), 2.94 – 2.79 (m, 5H), 2.79 – 2.68 (m, 2H), 2.61 (br, 1H), 1.88 – 1.79 (m, 2H).

**$^{13}\text{C}$  NMR** (100 MHz, Chloroform-*d*)  $\delta$  168.6, 141.8, 137.4, 136.2, 128.9, 128.6, 128.5, 126.1, 122.6, 121.2, 120.8, 114.2, 110.0, 57.8, 51.9, 48.9, 38.8, 37.7, 32.9, 27.4.

**HRMS-ESI** ( $m/z$ ):  $[\text{M} + \text{H}]^+$  calculated for  $\text{C}_{22}\text{H}_{25}\text{N}_2\text{O}_2^+$ , 349.1911, found 349.1914.

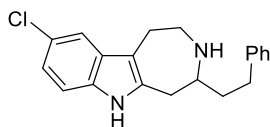

**9-chloro-4-phenethyl-1,2,3,4,5,6-hexahydroazepino[4,5-b]indole (4n)**

White solid, 56.2 mg, 87% yield. Characterization data:

**$^1\text{H}$  NMR** (400 MHz, Methanol-*d*<sub>4</sub>)  $\delta$  7.33 (d,  $J = 2.0$  Hz, 1H), 7.29 – 7.12 (m, 6H), 6.96 (dd,  $J = 8.5, 2.0$  Hz, 1H), 3.38 – 3.32 (m, 1H), 3.09 – 2.99 (m, 1H), 2.94 – 2.83

(m, 3H), 2.83 – 2.69 (m, 4H), 1.89 – 1.81 (m, 2H).

**<sup>13</sup>C NMR** (100 MHz, Chloroform-*d*) δ 141.9, 136.5, 133.0, 130.5, 128.6, 128.5, 126.1, 125.1, 121.2, 117.4, 112.9, 111.3, 57.9, 49.1, 39.1, 38.3, 33.0, 27.7.

**HRMS-ESI** (*m/z*): [M + H]<sup>+</sup> calculated for C<sub>20</sub>H<sub>22</sub>N<sub>2</sub>Cl<sup>+</sup>, 325.1466, found 325.1483.

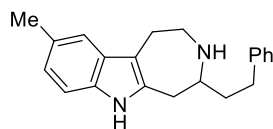

**9-methyl-4-phenethyl-1,2,3,4,5,6-hexahydroazepino[4,5-b]indole (4o)**

White solid, 49.3 mg, 81% yield. Characterization data:

**<sup>1</sup>H NMR** (400 MHz, Chloroform-*d*) δ 7.60 (br, 1H), 7.34 – 7.28 (m, 2H), 7.28 – 7.25 (m, 1H), 7.24 – 7.19 (m, 3H), 7.16 (d, *J* = 8.2 Hz, 1H), 6.95 (dd, *J* = 8.2, 1.6 Hz, 1H), 3.45 – 3.38 (m, 1H), 3.02 – 2.94 (m, 1H), 2.92 – 2.70 (m, 7H), 2.46 (s, 3H), 1.89 – 1.81 (m, 2H).

**<sup>13</sup>C NMR** (100 MHz, Chloroform-*d*) δ 142.0, 135.0, 133.0, 129.5, 128.6, 128.6, 128.5, 128.5, 128.5, 126.1, 122.6, 117.5, 112.5, 110.0, 58.0, 49.3, 39.1, 38.2, 33.0, 27.7, 21.7.

**HRMS-ESI** (*m/z*): [M + H]<sup>+</sup> calculated for C<sub>21</sub>H<sub>25</sub>N<sub>2</sub><sup>+</sup>, 305.2012, found 305.2035.

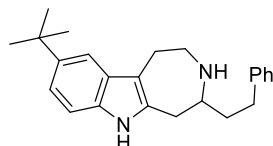

**9-(tert-butyl)-4-phenethyl-1,2,3,4,5,6-hexahydroazepino[4,5-b]indole (4p)**

Brown oil, 49.4 mg, 71% yield. Characterization data:

**<sup>1</sup>H NMR** (400 MHz, Chloroform-*d*) δ 7.65 (br, 1H), 7.45 (s, 1H), 7.33 – 7.27 (m, 2H), 7.25 – 7.16 (m, 5H), 3.48 – 3.38 (m, 1H), 3.23 (br, 1H), 3.08 – 2.99 (m, 1H), 2.98 – 2.69 (m, 7H), 1.95 – 1.80 (m, 2H), 1.40 (s, 9H).

**<sup>13</sup>C NMR** (100 MHz, Chloroform-*d*) δ 142.3, 141.9, 134.8, 132.8, 128.8, 128.6, 128.5, 126.1, 119.4, 113.5, 112.8, 109.9, 57.8, 48.9, 38.6, 37.5, 34.7, 33.0, 32.1, 27.2.

**HRMS-ESI** (*m/z*): [M + H]<sup>+</sup> calculated for C<sub>24</sub>H<sub>31</sub>N<sub>2</sub><sup>+</sup>, 347.2482, found 347.2499.

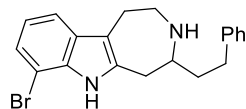

**7-bromo-4-phenethyl-1,2,3,4,5,6-hexahydroazepino[4,5-b]indole (4q)**

Brown solid, 70.3 mg, 96% yield. Characterization data:

**<sup>1</sup>H NMR** (400 MHz, Chloroform-*d*)  $\delta$  7.88 (br, 1H), 7.39 (d,  $J = 7.8$  Hz, 1H), 7.34 – 7.18 (m, 6H), 7.01 – 6.93 (m, 1H), 3.48 – 3.36 (m, 1H), 3.04 – 2.69 (m, 8H), 2.53 (br, 1H), 1.94 – 1.81 (m, 2H).

**<sup>13</sup>C NMR** (100 MHz, Chloroform-*d*)  $\delta$  141.8, 135.7, 133.3, 130.4, 128.6, 128.5, 126.1, 123.4, 120.5, 117.0, 114.3, 104.0, 57.9, 49.0, 39.0, 38.0, 33.0, 27.8.

**HRMS-ESI** ( $m/z$ ):  $[M + H]^+$  calculated for C<sub>20</sub>H<sub>22</sub>N<sub>2</sub>Br<sup>+</sup>, 369.0961, found 369.0959.

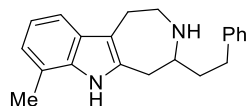

**7-methyl-4-phenethyl-1,2,3,4,5,6-hexahydroazepino[4,5-b]indole (4r)**

Brown solid, 58.2 mg, 96% yield. Characterization data:

**<sup>1</sup>H NMR** (400 MHz, Chloroform-*d*)  $\delta$  7.75 (br, 1H), 7.40 – 7.30 (m, 3H), 7.28 – 7.21 (m, 3H), 7.12 – 7.03 (m, 1H), 7.01 – 6.94 (m, 1H), 3.55 (br, 1H), 3.49 – 3.42 (m, 1H), 3.08 – 2.73 (m, 8H), 2.49 (s, 3H), 1.98 – 1.85 (m, 2H).

**<sup>13</sup>C NMR** (100 MHz, Chloroform-*d*)  $\delta$  141.8, 134.2, 134.2, 128.7, 128.6, 128.5, 126.1, 121.8, 119.6, 115.5, 113.2, 57.8, 48.8, 38.5, 37.3, 32.9, 27.2, 16.7.

**HRMS-ESI** ( $m/z$ ):  $[M + H]^+$  calculated for C<sub>21</sub>H<sub>25</sub>N<sub>2</sub><sup>+</sup>, 305.2012, found 305.2035.

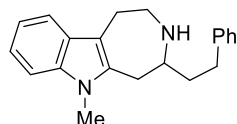

**6-methyl-4-phenethyl-1,2,3,4,5,6-hexahydroazepino[4,5-b]indole (4s)**

Brown solid, 53.5 mg, 88% yield. Characterization data:

**<sup>1</sup>H NMR** (400 MHz, Chloroform-*d*)  $\delta$  7.51 (d,  $J = 7.8$  Hz, 1H), 7.37 – 7.31 (m, 2H), 7.29 – 7.23 (m, 3H), 7.23 – 7.17 (m, 1H), 7.16 – 7.10 (m, 1H), 3.66 (s, 3H), 3.46 – 3.40 (m, 1H), 3.14 – 3.04 (m, 2H), 3.01 – 2.76 (m, 6H), 2.52 (br, 1H), 1.98 – 1.90 (m, 2H).

**<sup>13</sup>C NMR** (100 MHz, Chloroform-*d*)  $\delta$  141.9, 136.3, 136.2, 128.6, 128.6, 128.5, 128.5, 127.7, 126.1, 120.8, 118.9, 117.7, 112.4, 109.0, 57.4, 48.7, 39.1, 34.9, 33.0, 29.6, 27.3.

**HRMS-ESI** ( $m/z$ ):  $[M + H]^+$  calculated for C<sub>21</sub>H<sub>25</sub>N<sub>2</sub><sup>+</sup>, 305.2012, found 305.2035.

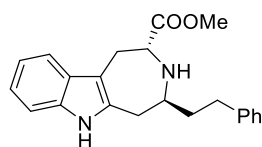

**methyl (2R,4S)-4-phenethyl-1,2,3,4,5,6-hexahydroazepino[4,5-b]indole-2-carboxylate (4t)**

General procedure, with 1.2 equiv. of **3a** and shorter reaction time (12 hours). This reaction was carried out under N<sub>2</sub>.

Light yellow solid, 79% yield, dr=7:1. Characterization data:

**<sup>1</sup>H NMR** (400 MHz, Chloroform-*d*)  $\delta$  7.72 (br, 1H), 7.54 – 7.48 (m, 1H), 7.33 – 7.24 (m, 3H), 7.23 – 7.17 (m, 3H), 7.16 – 7.08 (m, 2H), 3.99 (dd, *J* = 9.5, 2.8 Hz, 1H), 3.74 (s, 3H), 3.44 – 3.36 (m, 1H), 3.32 (dd, *J* = 15.3, 2.8 Hz, 1H), 3.13 (dd, *J* = 15.3, 9.6 Hz, 1H), 3.04 (dd, *J* = 15.6, 2.4 Hz, 1H), 2.88 – 2.65 (m, 3H), 2.33 (br, 1H), 1.97 – 1.85 (m, 1H), 1.84 – 1.72 (m, 1H).

**<sup>13</sup>C NMR** (100 MHz, Chloroform-*d*)  $\delta$  174.6, 142.0, 134.9, 134.6, 129.0, 128.6, 128.5, 126.0, 121.2, 119.5, 117.7, 110.5, 109.7, 56.8, 52.5, 52.2, 36.8, 36.0, 32.9, 28.3.

**HRMS-ESI** (*m/z*): [M + H]<sup>+</sup> calculated for C<sub>22</sub>H<sub>25</sub>N<sub>2</sub>O<sub>2</sub><sup>+</sup>, 349.1911, found 349.1914.

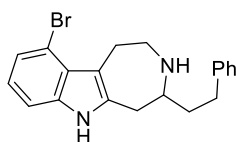

**10-bromo-4-phenethyl-1,2,3,4,5,6-hexahydroazepino[4,5-b]indole (4u)**

Brown solid, 50.9 mg, 69% yield. Characterization data:

**<sup>1</sup>H NMR** (400 MHz, Chloroform-*d*)  $\delta$  7.94 (s, 1H), 7.34 – 7.29 (m, 2H), 7.26 – 7.17 (m, 5H), 6.92 (t, *J* = 7.8 Hz, 1H), 3.86 – 3.75 (m, 1H), 3.46 – 3.35 (m, 1H), 3.19 – 3.10 (m, 1H), 3.02 – 2.71 (m, 7H), 1.97 – 1.79 (m, 2H).

**<sup>13</sup>C NMR** (100 MHz, Methanol-*d*<sub>4</sub>)  $\delta$  140.1, 136.6, 134.2, 128.3, 128.0, 126.1, 125.2, 123.6, 121.8, 112.5, 110.3, 110.1, 56.4, 45.0, 34.3, 31.2, 28.6, 22.2.

**HRMS-ESI** (*m/z*): [M + H]<sup>+</sup> calculated for C<sub>20</sub>H<sub>22</sub>N<sub>2</sub>Br<sup>+</sup>, 369.0961, found 369.0959.

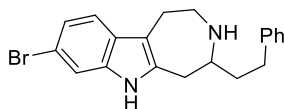

**8-bromo-4-phenethyl-1,2,3,4,5,6-hexahydroazepino[4,5-b]indole (4w)**

Brown solid, 40.3 mg, 55% yield. Characterization data:

**<sup>1</sup>H NMR** (400 MHz, Chloroform-*d*)  $\delta$  7.72 (s, 1H), 7.37 (d, *J* = 1.4 Hz, 1H), 7.33 – 7.27 (m, 3H), 7.24 – 7.15 (m, 4H), 3.46 – 3.35 (m, 1H), 2.98 – 2.71 (m, 8H), 2.54 (s, 1H), 1.92 – 1.79 (m, 2H).

**<sup>13</sup>C NMR** (100 MHz, Methanol-*d*<sub>4</sub>)  $\delta$  140.1, 136.0, 133.1, 128.3, 128.0, 126.9, 126.1, 121.9, 118.4, 114.2, 113.3, 109.8, 57.1, 45.9, 34.5, 31.2, 29.1, 21.0.

**HRMS-ESI** ( $m/z$ ):  $[M + H]^+$  calculated for  $C_{20}H_{22}N_2Br$ , 369.0966, found 369.0959.

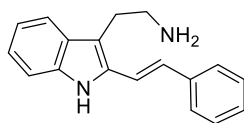

**(E)-2-(2-styryl-1H-indol-3-yl)ethan-1-amine (5)**

General procedure, with 2.0 equiv. of TFA, higher concentration and temperature (0.5 mL, 80 °C). This reaction was carried out in a sealed tube, and purified by flash column chromatography (silica gel, DCM: MeOH = 20:1 to 10:1).

Brown solid, 41.9 mg, 80% yield. Characterization data:

**$^1H$  NMR** (400 MHz, Chloroform- $d$ )  $\delta$  8.32 (br, 1H), 7.58 (d,  $J$  = 7.9 Hz, 1H), 7.53 – 7.48 (m, 2H), 7.41 – 7.17 (m, 6H), 7.13 – 7.07 (m, 1H), 6.83 (d,  $J$  = 16.5 Hz, 1H), 3.08 – 2.99 (m, 4H), 1.47 (br, 2H).

**$^{13}C$  NMR** (100 MHz, Chloroform- $d$ )  $\delta$  137.1, 136.8, 133.4, 129.2, 128.9, 127.8, 126.4, 123.4, 119.8, 119.1, 117.1, 114.7, 110.7, 43.2, 28.5.

**HRMS-ESI** ( $m/z$ ):  $[M + H]^+$  calculated for  $C_{18}H_{19}N_2^+$ , 263.1543, found 263.1535.

#### 4. Synthesis of Exocyclic Alkenes 6 and Ngouniensines

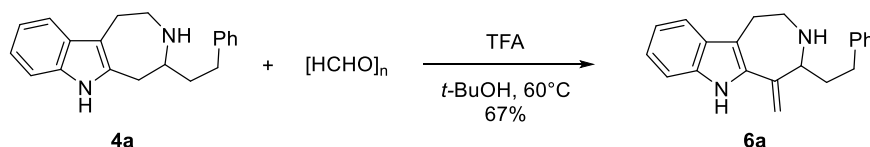

To a stirred solution of **4a** (58.0 mg, 0.2 mmol, 1.0 equiv.) and paraformaldehyde (6.6 mg, 0.22 mmol, 1.1 equiv.) in *t*-BuOH (1.0 mL) was added TFA (91.2 mg, 0.8 mmol, 4.0 equiv.) at room temperature. After being stirred at 60 °C for 3 hours, the reaction was cooled to room temperature and quenched with saturated aqueous  $NaHCO_3$  (5 mL). The biphasic layers were separated, and the aqueous layer was extracted with DCM (3×10 mL). The combined organic layers were dried over anhydrous  $Na_2SO_4$  and concentrated under reduced pressure. The resulting residue was purified by flash column chromatography (silica gel, DCM: MeOH = 100:3) to afford **6a** (40.7 mg, 67% yield) as a brown solid. Characterization data:

**$^1H$  NMR** (400 MHz, Chloroform- $d$ )  $\delta$  7.86 (s, 1H), 7.51 (d,  $J$  = 7.9 Hz, 1H), 7.32 (d,  $J$  = 8.0 Hz, 1H), 7.29 – 7.21 (m, 3H), 7.21 – 7.15 (m, 4H), 7.14 – 7.09 (m, 1H), 5.26 (s, 1H), 5.21 (s, 1H), 3.77 (t,  $J$  = 7.0 Hz, 1H), 3.37 (ddd,  $J$  = 13.6, 7.1, 4.2 Hz, 1H), 3.21 (ddd,  $J$  = 13.7, 6.9, 4.3 Hz, 1H), 2.82 – 2.65 (m, 2H), 2.80 – 2.66 (m, 2H), 2.05 – 1.95 (m, 2H).

**<sup>13</sup>C NMR** (100 MHz, Chloroform-*d*) δ 146.0, 142.1, 135.9, 133.8, 129.1, 128.6, 128.5, 126.0, 122.7, 119.7, 118.8, 113.0, 112.2, 110.7, 62.2, 44.2, 36.3, 33.0, 28.1.

**HRMS-ESI** (*m/z*): [M + H]<sup>+</sup> calculated for C<sub>21</sub>H<sub>23</sub>N<sub>2</sub><sup>+</sup>, 303.1856, found 303.1853.

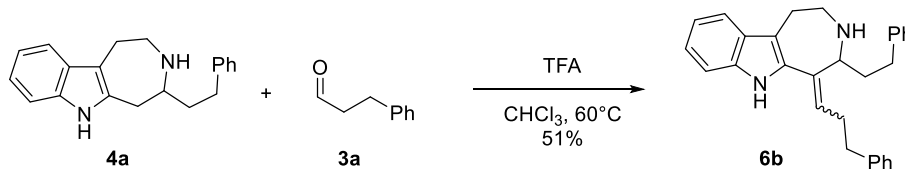

To a stirred solution of **4a** (58.0 mg, 0.2 mmol, 1.0 equiv.) and **3a** (53.6 mg, 0.4 mmol, 2.0 equiv.) in CHCl<sub>3</sub> (1.0 mL) was added TFA (91.2 mg, 0.8 mmol, 4.0 equiv.) at room temperature. After being stirred at 60 °C for 6 hours, the reaction was cooled to room temperature and quenched with saturated aqueous NaHCO<sub>3</sub> (5 mL). The biphasic layers were separated, and the aqueous layer was extracted with DCM (3×10 mL). The combined organic layers were dried over anhydrous Na<sub>2</sub>SO<sub>4</sub> and concentrated under reduced pressure. The resulting residue was purified by flash column chromatography (silica gel, DCM: MeOH = 50:1) to afford **6b** (41.6 mg, 51% yield, Z/E = 3:1) as a brown solid. Characterization data:

Z-isomer:

**<sup>1</sup>H NMR** (400 MHz, Chloroform-*d*) δ 7.45 – 7.32 (m, 4H), 7.25 – 7.12 (m, 6H), 7.10 – 7.01 (m, 4H), 6.32 (s, 1H), 6.19 – 6.10 (m, 1H), 4.32 (dd, J = 9.9, 3.5 Hz, 1H), 3.57 – 3.45 (m, 1H), 3.41 – 3.29 (m, 1H), 3.22 – 3.07 (m, 2H), 2.96 – 2.85 (m, 1H), 2.79 – 2.55 (m, 3H), 2.55 – 2.37 (m, 2H), 2.32 – 2.19 (m, 1H), 1.91 – 1.74 (m, 1H).

**<sup>13</sup>C NMR** (100 MHz, Chloroform-*d*) δ 141.5, 140.4, 138.4, 135.4, 129.8, 129.5, 129.1, 128.6, 128.6, 127.9, 127.4, 127.0, 126.3, 122.5, 119.9, 118.4, 111.1, 111.0, 63.8, 42.0, 35.0, 32.6, 32.4, 32.3, 22.2.

**HRMS-ESI** (*m/z*): [M + H]<sup>+</sup> calculated for C<sub>29</sub>H<sub>31</sub>N<sub>2</sub><sup>+</sup>, 407.2482, found 407.2495.

E-isomer:

**<sup>1</sup>H NMR** (400 MHz, Chloroform-*d*) δ 7.69 (s, 1H), 7.47 (d, J = 7.7 Hz, 1H), 7.34 – 7.08 (m, 13H), 5.73 (t, J = 7.4 Hz, 1H), 4.12 (t, J = 6.9 Hz, 1H), 3.31 – 3.23 (m, 1H), 3.05 – 2.64 (m, 6H), 2.63 – 2.50 (m, 2H), 2.49 – 2.36 (m, 1H), 1.99 – 1.87 (m, 1H), 1.83 – 1.71 (m, 1H).

**<sup>13</sup>C NMR** (101 MHz, Chloroform-*d*) δ 141.9, 141.4, 137.9, 135.6, 134.2, 129.9, 129.1, 128.8, 128.6, 128.5, 128.4, 126.3, 126.0, 122.2, 119.6, 118.6, 111.2, 110.6, 56.9, 42.5, 36.1, 35.9, 32.7, 30.0, 28.2.

**HRMS-ESI** (*m/z*): [M + H]<sup>+</sup> calculated for C<sub>29</sub>H<sub>31</sub>N<sub>2</sub><sup>+</sup>, 407.2482, found 407.2495.

### Synthesis of **3v**.<sup>4</sup>

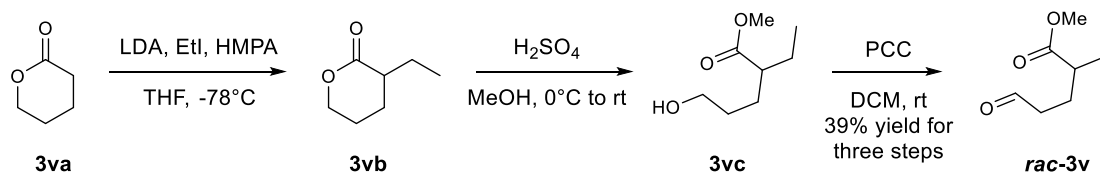

To a solution of LDA (2.0 M in THF/heptane/ethylbenzene, 26.8 mL, 53.6 mmol) in THF (40 mL) was added a solution of δ-valerolactone (**3va**, 5.00 g, 50 mmol) in THF (75 mL) at -78 °C under N<sub>2</sub> atmosphere. After the reaction mixture was stirred for 0.5 hour at -78 °C, a solution of EtI (8 mL, 100 mmol) in HMPA (19.1 mL, 110 mmol) was added. The mixture was stirred for 18 hours at -78 °C, and quenched by adding saturated aqueous NH<sub>4</sub>Cl. The aqueous layer was extracted three times with Et<sub>2</sub>O (200 mL). The combined organic layers were washed with brine, dried over anhydrous Na<sub>2</sub>SO<sub>4</sub> and concentrated under reduced pressure. The residue (**3vb**) was used for the next reaction without further purification.

To a solution of the above product **3vb** in MeOH (50 mL) was added H<sub>2</sub>SO<sub>4</sub> (5 mL in 45 mL MeOH) at 0 °C. Then, the reaction mixture was allowed to warm to room temperature and stirred for 20 hours. The reaction was quenched by adding 1 M aqueous NaOH to pH=7. The aqueous layer was extracted three times with CHCl<sub>3</sub> (200 mL). The combined organic layers were dried over anhydrous Na<sub>2</sub>SO<sub>4</sub> and concentrated under reduced pressure. The residue (**3vc**) was used for the next reaction without further purification.

To a solution of the above product **3vc** in DCM (250 mL), celite (27.3 g) and pyridinium chlorochromate (13.80 g, 64 mmol) were added. The mixture was stirred at room temperature for 3 hours. Hexane (200 mL) was added to dilute the mixture, which was then filtered through a pad of celite. The filtrate was concentrated under reduced pressure. The resulting residue was purified by flash column chromatography (silica gel, PE: EtOAc = 5:1) to afford compound *rac*-**3v** (3.09g, 39% yield for three steps) as a colorless oil. Characterization data:

**<sup>1</sup>H NMR** (400 MHz, Chloroform-*d*) δ 9.69 (s, 1H), 3.62 (s, 3H), 2.47 – 2.34 (m, 2H), 2.32 – 2.23 (m, 1H), 1.90 – 1.73 (m, 2H), 1.67 – 1.54 (m, 1H), 1.54 – 1.42 (m, 1H), 0.84 (t, *J* = 7.4 Hz, 3H).

**<sup>13</sup>C NMR** (100 MHz, Chloroform-*d*) δ 201.5, 175.9, 51.5, 46.2, 41.6, 25.4, 23.9, 11.6.

**HRMS-ESI** (*m/z*): [M + H]<sup>+</sup> calculated for C<sub>8</sub>H<sub>15</sub>O<sub>3</sub><sup>+</sup>, 159.1016, found 159.1011.

<sup>4</sup> R. Tokuda, Y. Okamoto, T. Koyama, N. Kogure, M. Kitajima, H. Takayama, *Org. Lett.*, **2016**, 18(14), 3490-3493.

### Total synthesis of Ngouniensines.

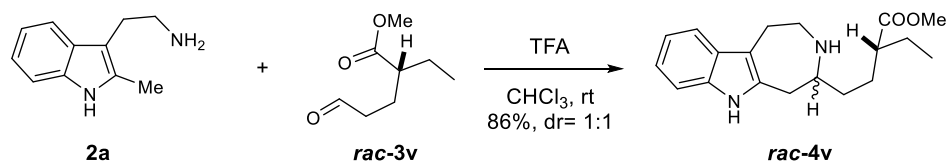

Compound *rac-4v* was obtained as a brown oil (267.6 mg, 86% yield, dr=1:1) by following the general procedure. Characterization data:

**$^1\text{H}$  NMR** (400 MHz, Chloroform-*d*) mixture of diastereomers,  $\delta$  7.87 (br, 1H), 7.50 – 7.40 (m, 1H), 7.32 – 7.20 (m, 1H), 7.16 – 7.04 (m, 2H), 3.68 (s, 3H), 3.43 – 3.34 (m, 1H), 3.05 – 2.94 (m, 1H), 2.94 – 2.76 (m, 5H), 2.45 (br, 1H), 2.37 – 2.26 (m, 1H), 1.78 – 1.43 (m, 6H), 0.97 – 0.86 (m, 3H).

**$^{13}\text{C}$  NMR** (100 MHz, Chloroform-*d*) mixture of diastereomers,  $\delta$  176.8, 176.7, 134.7, 134.7, 129.2, 129.1, 121.0, 119.3, 117.7, 112.8, 112.8, 110.4, 110.4, 58.4, 51.6, 49.2, 49.0, 47.3, 47.2, 37.5, 37.3, 35.0, 35.0, 29.0, 28.8, 27.4, 27.3, 25.7, 25.6, 11.9.

**HRMS-ESI** ( $m/z$ ):  $[\text{M} + \text{H}]^+$  calculated for  $\text{C}_{19}\text{H}_{27}\text{N}_2\text{O}_2^+$ , 315.2067, found 315.2076.

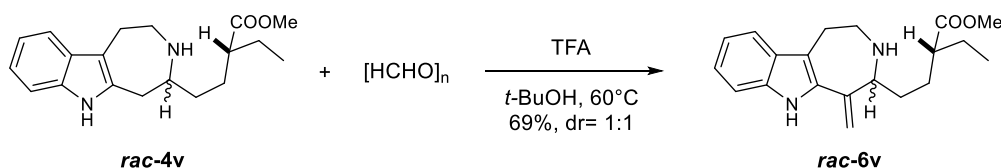

To a stirred solution of *rac-4v* (62.8 mg, 0.2 mmol, 1.0 equiv.) and paraformaldehyde (6.6 mg, 0.22 mmol, 1.1 equiv.) in *t*-BuOH (1.0 mL) was added TFA (91.2 mg, 0.8 mmol, 4.0 equiv.) at room temperature. After being stirred at 60 °C for 3 hours, the mixture was cooled to room temperature and quenched with saturated aqueous  $\text{NaHCO}_3$  (5 mL). The biphasic layers were separated, and the aqueous layer was extracted with DCM (3×10 mL). The combined organic layers were dried over anhydrous  $\text{Na}_2\text{SO}_4$  and concentrated under reduced pressure. The resulting residue was purified by flash column chromatography (silica gel, DCM: MeOH = 100:3) to afford *rac-6v* (43.3 mg, 69% yield, dr=1:1) as a brown solid. Characterization data:

**$^1\text{H}$  NMR** (400 MHz, Chloroform-*d*) mixture of diastereomers,  $\delta$  7.99 (d,  $J$  = 8.3 Hz, 1H), 7.49 (d,  $J$  = 7.9 Hz, 1H), 7.31 (d,  $J$  = 8.0 Hz, 1H), 7.18 (t,  $J$  = 7.6 Hz, 1H), 7.10 (t,  $J$  = 7.5 Hz, 1H), 5.24 (d,  $J$  = 5.9 Hz, 1H), 5.17 (d,  $J$  = 5.4 Hz, 1H), 3.72 – 3.66 (m, 1H), 3.64 (s, 1.5H), 3.59 (s, 1.5H), 3.35 – 3.26 (m, 1H), 3.21 – 3.11 (m, 1H), 3.01 – 2.95 (m, 2H), 2.32 – 2.23 (m, 1H), 1.80 – 1.45 (m, 7H), 0.87 (t,  $J$  = 8.0 Hz, 3H).

**$^{13}\text{C}$  NMR** (100 MHz, Chloroform-*d*) mixture of diastereomers,  $\delta$  176.8, 176.7, 146.2, 145.8, 135.9, 135.8, 133.7, 133.6, 129.0, 129.0, 122.6, 122.6, 119.6, 118.8, 118.8,

112.9, 112.8, 112.4, 112.0, 110.7, 110.7, 63.0, 62.8, 51.5, 51.5, 47.2, 47.2, 44.0, 44.0, 32.6, 32.6, 29.1, 29.1, 28.3, 28.2, 25.7, 25.6, 11.9, 11.9.

**HRMS-ESI** ( $m/z$ ):  $[M + H]^+$  calculated for  $C_{20}H_{27}N_2O_2^+$ , 327.2067, found 327.2052.

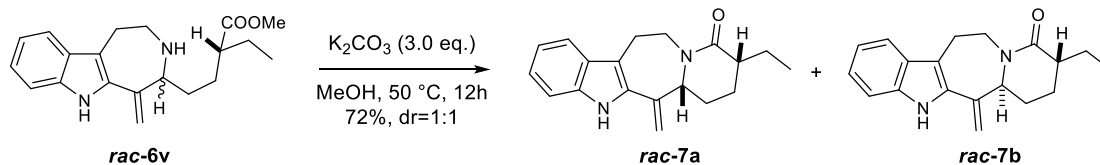

To a solution of *rac-6v* (47.2 mg, 0.145 mmol, 1.0 equiv.) in MeOH (1.4 mL) was added  $K_2CO_3$  (59.9 mg, 0.434 mmol, 3.0 equiv.) at room temperature. The reaction was stirred at 50 °C for 12 hours, and quenched with saturated aqueous  $NH_4Cl$  (5 mL). The biphasic layers were separated and the aqueous layer was extracted with EtOAc (3×10 mL). The combined organic layers were dried over anhydrous  $Na_2SO_4$  and concentrated under reduced pressure. The resulting residue was purified by flash column chromatography (silica gel, DCM: MeOH = 100:1) to afford compound *rac-7a* (15.3 mg, 36% yield) and *rac-7b* (15.3 mg, 36% yield) as a white solid. (*7a* and *7b* were separable in column chromatography). Characterization data:

***rac-7a*:**

**$^1H$  NMR** (400 MHz,  $DMSO-d_6$ )  $\delta$  10.84 (s, 1H), 7.40 (d,  $J = 7.8$  Hz, 1H), 7.28 (d,  $J = 8.1$  Hz, 1H), 7.08 (t,  $J = 7.5$  Hz, 1H), 6.95 (t,  $J = 7.4$  Hz, 1H), 5.43 (s, 1H), 5.37 (s, 1H), 4.65 – 4.57 (m, 1H), 4.39 – 4.32 (m, 1H), 3.19 – 3.08 (m, 2H), 2.82 – 2.74 (m, 1H), 2.20 – 2.12 (m, 1H), 2.03 – 1.77 (m, 3H), 1.60 – 1.50 (m, 2H), 1.26 – 1.18 (m, 1H), 0.69 (t,  $J = 7.4$  Hz, 3H).

**$^{13}C$  NMR** (100 MHz,  $DMSO-d_6$ )  $\delta$  171.5, 142.7, 136.1, 131.6, 128.0, 121.9, 118.5, 118.4, 113.8, 110.8, 110.7, 63.3, 43.9, 41.2, 28.9, 24.6, 24.1, 22.7, 11.3.

**HRMS-ESI** ( $m/z$ ):  $[M + H]^+$  calculated for  $C_{19}H_{23}N_2O^+$ , 295.1805, found 295.1805.

***rac-7b*:**

**$^1H$  NMR** (400 MHz,  $DMSO-d_6$ )  $\delta$  10.87 (s, 1H), 7.39 (d,  $J = 7.8$  Hz, 1H), 7.29 (d,  $J = 8.1$  Hz, 1H), 7.08 (t,  $J = 7.3$  Hz, 1H), 6.96 (t,  $J = 7.3$  Hz, 1H), 5.37 (s, 1H), 5.34 (s, 1H), 4.63 – 4.56 (m, 1H), 4.33 – 4.25 (m, 1H), 3.28 – 3.11 (m, 2H), 2.77 – 2.69 (m, 1H), 2.05 – 1.95 (m, 2H), 1.89 – 1.73 (m, 2H), 1.65 – 1.50 (m, 2H), 1.44 – 1.35 (m, 1H), 0.83 (t,  $J = 7.4$  Hz, 3H).

**$^{13}C$  NMR** (100 MHz,  $DMSO-d_6$ )  $\delta$  170.8, 143.3, 136.1, 131.0, 127.9, 121.8, 118.5, 118.3, 114.2, 110.9, 110.5, 65.2, 43.2, 41.8, 31.9, 24.8, 24.2, 24.1, 11.0.

**HRMS-ESI** ( $m/z$ ):  $[M + H]^+$  calculated for  $C_{19}H_{23}N_2O^+$ , 295.1805, found 295.1808.

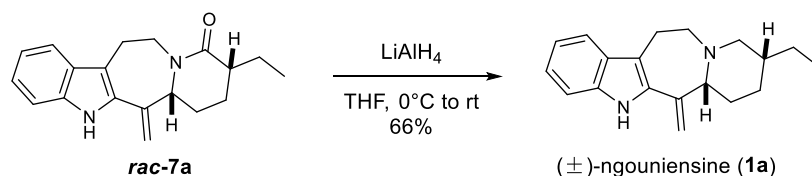

To a solution of *rac*-**7a** (39.0 mg, 0.133 mmol, 1.0 equiv.) in THF (2.7 mL) was added LiAlH<sub>4</sub> (25.2 mg, 0.663 mmol, 5.0 equiv.) at 0 °C. The resulting suspension was stirred for 10 min at 0 °C and then warmed to room temperature for 2 hours. The mixture was cooled to 0 °C again and quenched with 25 uL of water, followed by 25 uL of a 15% aqueous NaOH solution and finally an additional 75 uL of water. The resulting suspension was stirred vigorously for 1 hour at room temperature. Then anhydrous MgSO<sub>4</sub> was added, and the mixture was stirred for another 30 minutes. The inorganic salts were removed by filtration, and the filtrate was concentrated under reduced pressure. The resulting residue was purified by flash column chromatography (silica gel, PE: EA = 1:1) to afford (±)-ngouniensine (**1a**, 24.4 mg, 66% yield) as a yellow solid. Characterization data:

**<sup>1</sup>H NMR** (400 MHz, Chloroform-*d*) δ 7.89 (s, 1H), 7.50 (d, *J* = 7.8 Hz, 1H), 7.30 (d, *J* = 8.0 Hz, 1H), 7.18 (t, *J* = 7.4 Hz, 1H), 7.10 (t, *J* = 7.3 Hz, 1H), 5.46 (s, 1H), 5.30 (s, 1H), 3.73 (t, *J* = 4.9 Hz, 1H), 3.33 – 3.23 (m, 1H), 3.08 – 2.97 (m, 2H), 2.95 – 2.85 (m, 1H), 2.75 (dd, *J* = 11.5, 3.3 Hz, 1H), 2.49 (dd, *J* = 11.4, 7.6 Hz, 1H), 2.12 – 2.02 (m, 1H), 1.87 – 1.77 (m, 1H), 1.73 – 1.64 (m, 1H), 1.63 – 1.54 (m, 1H), 1.54 – 1.44 (m, 1H), 1.44 – 1.30 (m, 2H), 0.91 (t, *J* = 7.4 Hz, 3H).

**<sup>13</sup>C NMR** (100 MHz, Chloroform-*d*) δ 142.4, 135.8, 135.6, 128.9, 122.7, 119.6, 118.8, 115.4, 112.1, 110.6, 62.3, 56.6, 55.2, 37.9, 29.2, 28.0, 26.2, 22.6, 11.9.

**HRMS-ESI** (*m/z*): [M + H]<sup>+</sup> calculated for C<sub>19</sub>H<sub>25</sub>N<sub>2</sub><sup>+</sup>, 281.2012, found 281.2011.

### NMR Spectral Comparison of Ngouniensine.

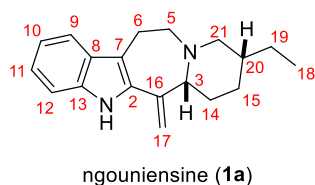

| Position | <sup>1</sup> H NMR (δ ppm) |           |
|----------|----------------------------|-----------|
|          | Isolated <sup>5</sup>      | This work |

<sup>5</sup> G. Massiot, M. Zeches, P. Thepenier, M.-J. Jacquier, L. Le Men-Olivier, C. Delaude. *J. Chem. Soc. Chem. Commun.* 1982, 768.

|               |                          |                                  |
|---------------|--------------------------|----------------------------------|
| N-H           | 7.97 (s)                 | 7.89 (s, -0.08)                  |
| H-3 $\beta$   | 3.72 (t)                 | 3.73 (t, +0.01)                  |
| H-5           | 3.28, 3.00<br>(2H), 2.91 | 3.28 (m, 0), 3.02 (m, +0.02)     |
| H-6           |                          | 3.02 (m, +0.02), 2.89 (m, -0.02) |
| H-14 $\alpha$ | 2.05 (m)                 | 2.06 (m, +0.01)                  |
| H-14 $\beta$  | 1.82 (m)                 | 1.82 (m,0)                       |
| H-15 $\alpha$ | 1.46 (m)                 | 1.48 (m, +0.02)                  |
| H-15 $\beta$  | 1.67 (m)                 | 1.68 (m, +0.01)                  |
| H-17          | 5.47 (s)                 | 5.46 (s, -0.01)                  |
| H-17'         | 5.31 (s)                 | 5.30 (s, -0.01)                  |
| H-18          | 0.90 (t)                 | 0.91 (t, +0.01)                  |
| H-19          | 1.38 (m)                 | 1.40 (m, +0.02)                  |
| H-19'         | 1.32 (m)                 | 1.33 (m, +0.01)                  |
| H-20 $\beta$  | 1.58 (m)                 | 1.59 (m,+0.01)                   |
| H-21 $\alpha$ | 2.48 (dd)                | 2.49 (dd, +0.01)                 |
| H-21 $\beta$  | 2.75 (dd)                | 2.75 (dd,0)                      |

| Position | <sup>13</sup> C NMR ( $\delta$ ppm) |              |
|----------|-------------------------------------|--------------|
|          | Isolated                            | This work    |
| 2        | 142.2                               | 142.4 (+0.2) |
| 3        | 62.3                                | 62.3 (0)     |
| 5        | 56.4                                | 56.6 (+0.2)  |
| 6        | 22.5                                | 22.6 (+0.1)  |
| 7        | 115.2                               | 115.4 (+0.2) |
| 8        | 128.9                               | 128.9 (0)    |
| 9        | 118.7                               | 118.8 (+0.1) |
| 10       | 122.5                               | 122.7 (+0.2) |
| 11       | 119.4                               | 119.6 (+0.2) |
| 12       | 110.7                               | 110.6 (-0.1) |
| 13       | 135.7                               | 135.6 (-0.1) |
| 14       | 27.8                                | 28.0 (+0.2)  |
| 15       | 26.0                                | 26.2 (+0.2)  |
| 16       | 135.7                               | 135.8 (+0.1) |
| 17       | 112.1                               | 112.1 (0)    |
| 18       | 11.7                                | 11.9 (+0.2)  |
| 19       | 29.1                                | 29.2 (+0.1)  |
| 20       | 37.7                                | 37.9 (+0.2)  |
| 21       | 55.2                                | 55.2 (0)     |

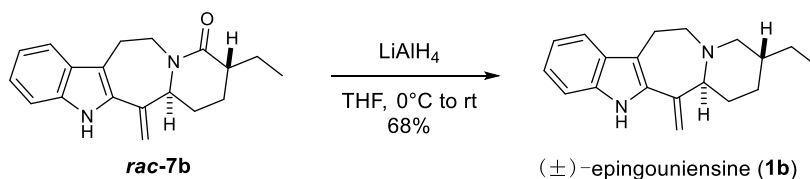

(±)-Epingouniensine (**1b**) was obtained as a yellow solid (25.4mg, 68% yield) by following the above procedure. Characterization data:

**<sup>1</sup>H NMR** (400 MHz, Chloroform-*d*) δ 7.84 (s, 1H), 7.50 (d, *J* = 7.8 Hz, 1H), 7.30 (d, *J* = 8.0 Hz, 1H), 7.18 (t, *J* = 7.4 Hz, 1H), 7.10 (t, *J* = 7.4 Hz, 1H), 5.36 (s, 1H), 5.31 (s, 1H), 3.26 – 3.18 (m, 1H), 3.17 – 3.07 (m, 2H), 3.01 – 2.85 (m, 3H), 2.31 (t, *J* = 10.9 Hz, 1H), 1.95 – 1.85 (m, 1H), 1.82 – 1.72 (m, 2H), 1.68 – 1.53 (m, 1H), 1.33 – 1.18 (m, 2H), 1.05 – 0.97 (m, 1H), 0.93 (t, *J* = 7.5 Hz, 3H).

**<sup>13</sup>C NMR** (100 MHz, Chloroform-*d*) δ 143.6, 135.7, 135.6, 128.9, 122.5, 119.5, 118.8, 114.7, 111.9, 110.7, 67.8, 62.0, 56.1, 38.4, 33.0, 31.3, 27.4, 22.2, 11.6.

**HRMS-ESI** (*m/z*): [M + H]<sup>+</sup> calculated for C<sub>19</sub>H<sub>25</sub>N<sub>2</sub><sup>+</sup>, 281.2012, found 281.2023.

### NMR Spectral Comparison of Epingouniensine.

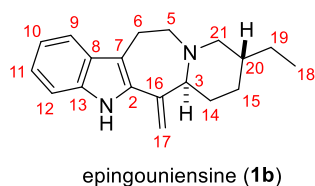

| Position | <sup>13</sup> C NMR (δ ppm) |              |
|----------|-----------------------------|--------------|
|          | Isolated <sup>6</sup>       | This work    |
| 2        | 143.2                       | 143.6 (+0.4) |
| 3        | 67.8                        | 67.8 (0)     |
| 5        | 55.8                        | 56.1 (+0.3)  |
| 6        | 22.2                        | 22.2(0)      |
| 7        | 114.3                       | 114.7 (+0.4) |
| 8        | 128.8                       | 128.9 (+0.1) |
| 9        | 118.5                       | 118.8(+0.3)  |
| 10       | 122.3                       | 122.5 (+0.2) |
| 11       | 119.3                       | 119.5 (+0.2) |
| 12       | 110.7                       | 110.7 (0)    |
| 13       | 135.7                       | 135.7 (0)    |
| 14       | 31.0                        | 31.3 (+0.3)  |

<sup>6</sup> G. Massiot, P. Thepenier, M.-J. Jacquier, J. Lounkokobi, C. Mirand, M. Zeches, L. Le Men-Olivier. *Tetrahedron*, **1983**, 39, 3645.

|    |       |              |
|----|-------|--------------|
| 15 | 27.1  | 27.4 (+0.3)  |
| 16 | 135.7 | 135.6(-0.1)  |
| 17 | 112.0 | 111.9 (-0.1) |
| 18 | 11.3  | 11.6 (+0.3)  |
| 19 | 32.7  | 33.0 (+0.3)  |
| 20 | 38.1  | 38.4 (+0.3)  |
| 21 | 61.8  | 62.0 (+0.2)  |

## 5. Synthesis of Tryptamine Derivative **8**<sup>7</sup> and Oxindole **9**

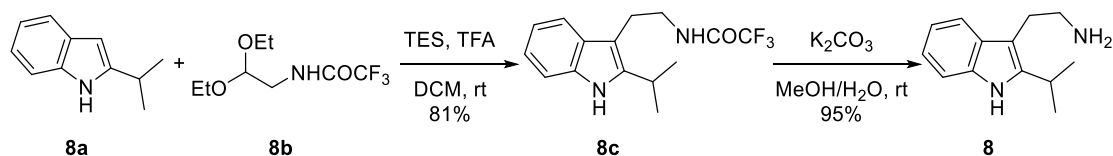

A solution of **8a**<sup>8</sup> (318 mg, 2.0 mmol) and **8b** (504 mg, 2.2 mmol) in DCM (4.0 mL) were added to a solution of trifluoroacetic acid (1140 mg, 10.0 mmol) and triethylsilane (698 mg, 6.0 mmol) in DCM (4.0 mL). The resulting mixture was stirred at room temperature for 3 hours. The reaction was cooled to 0 °C and carefully neutralized with saturated aqueous NaHCO<sub>3</sub> and diluted with DCM. The two phases were separated, and the aqueous layer was extracted three times with DCM (30 mL). The combined organic layers were washed with brine, dried over anhydrous Na<sub>2</sub>SO<sub>4</sub>, filtered, and concentrated under reduced pressure. The residue was purified by flash chromatography (silica gel, PE: EtOAc = 5:1) to afford **8c** (480 mg, 81% yield).

A solution of **8c** (480 mg, 1.61 mmol) and potassium carbonate (1104 mg, 8 mmol) in MeOH (32 mL)/H<sub>2</sub>O (2.4 mL) was heated to reflux for 2 hours. After removal of volatiles under reduced pressure, to the residue was added water (20 mL) and the mixture extracted three times with DCM (20 mL). The combined organic phases were washed with brine, dried over anhydrous Na<sub>2</sub>SO<sub>4</sub>, filtered, and concentrated under reduced pressure. The residue was purified by silica gel flash chromatography (DCM:MeOH = 10:1) to afford **8** as a light yellow oil (310 mg, 95% yield). Characterization data:

**<sup>1</sup>H NMR** (400 MHz, Chloroform-*d*) δ 8.14 (br, 1H), 7.55 (d, *J* = 7.6 Hz, 1H), 7.30 (d, *J* = 7.6 Hz, 1H), 7.18 – 7.06 (m, 2H), 3.35 – 3.23 (m, 1H), 3.01 (t, *J* = 6.9 Hz, 2H), 2.90 (t, *J* = 6.6 Hz, 2H), 1.79 (br, 2H), 1.34 (s, 3H), 1.32 (s, 3H).

<sup>7</sup> M. Righi, F. Topi, S. Bartolucci, A. Bedini, G. Piersanti, G. Spadoni, *J. Org. Chem.* **2012**, 77, 6351–6357.

<sup>8</sup> N. German, J.-S. Kim, A. Jain, M. Dukat, A. Pandya, Y. Ma, M. Weltzin, M. K. Schulte, R. A. Glennon, *J. Med. Chem.*, **2011**, 54, 7259–7267.

**$^{13}\text{C}$  NMR** (100 MHz, Chloroform-*d*)  $\delta$  141.8, 135.3, 128.8, 121.1, 119.2, 118.3, 110.6, 107.2, 42.9, 28.2, 25.6, 23.0.

**HRMS-ESI** ( $m/z$ ):  $[\text{M} + \text{H}]^+$  calculated for  $\text{C}_{13}\text{H}_{19}\text{N}_2^+$ , 203.1543, found 203.1521.

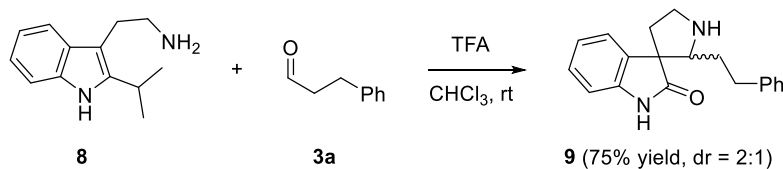

Oxindole **9** was obtained as a colorless oil (43.1 mg, 75% yield, dr=2:1) by following the general procedure. Characterization data:

**$^1\text{H}$  NMR** (400 MHz, Chloroform-*d*) mixture of diastereomers.  $\delta$  9.42 (br, 0.3H), 9.18 (br, 0.6H), 7.29 – 7.01 (m, 6H), 7.00 – 6.89 (m, 3H), 3.53 – 3.44 (m, 1H), 3.43 – 3.30 (m, 1H), 3.29 – 3.19 (m, 1H), 2.79 – 2.69 (m, 1H), 2.67 – 2.59 (m, 1H), 2.57 – 2.34 (m, 2H), 2.27 – 2.18 (m, 0.7H), 2.15 – 2.04 (m, 0.4H), 1.83 – 1.71 (m, 0.7H), 1.59 – 1.38 (m, 2H).

**$^{13}\text{C}$  NMR** (100 MHz, Chloroform-*d*) mixture of diastereomers.  $\delta$  182.5, 182.3, 141.8, 141.6, 141.4, 140.7, 132.5, 132.0, 128.4, 128.3, 128.3, 127.9, 127.9, 125.9, 125.9, 124.1, 122.7, 122.5, 110.1, 109.9, 71.0, 68.6, 58.3, 58.2, 46.6, 46.1, 38.8, 38.4, 34.0, 33.7, 33.3, 31.3.

**HRMS-ESI** ( $m/z$ ):  $[\text{M} + \text{H}]^+$  calculated for  $\text{C}_{19}\text{H}_{21}\text{N}_2\text{O}^+$ , 293.1648, found 293.1653.

## 6. NMR Spectra

$^1\text{H}$  NMR (400 MHz,  $\text{CDCl}_3$ , compound **2k**)

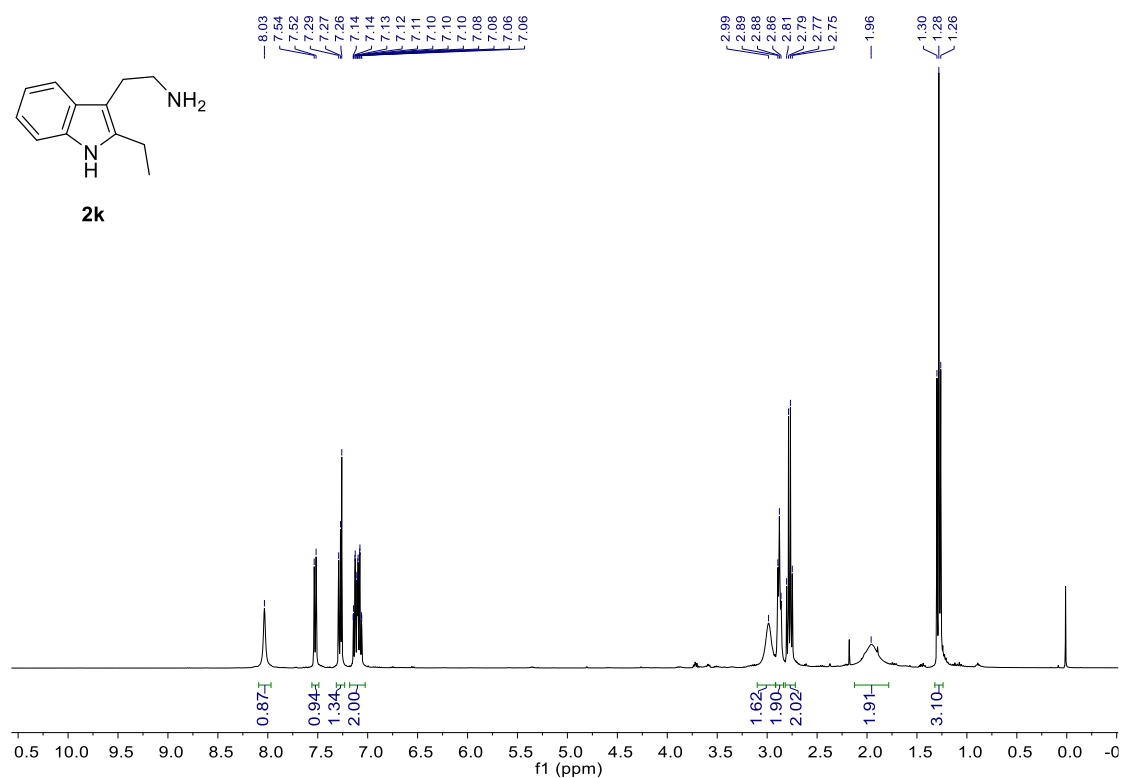

$^{13}\text{C}$  NMR (100 MHz,  $\text{CDCl}_3$ , compound **2k**)

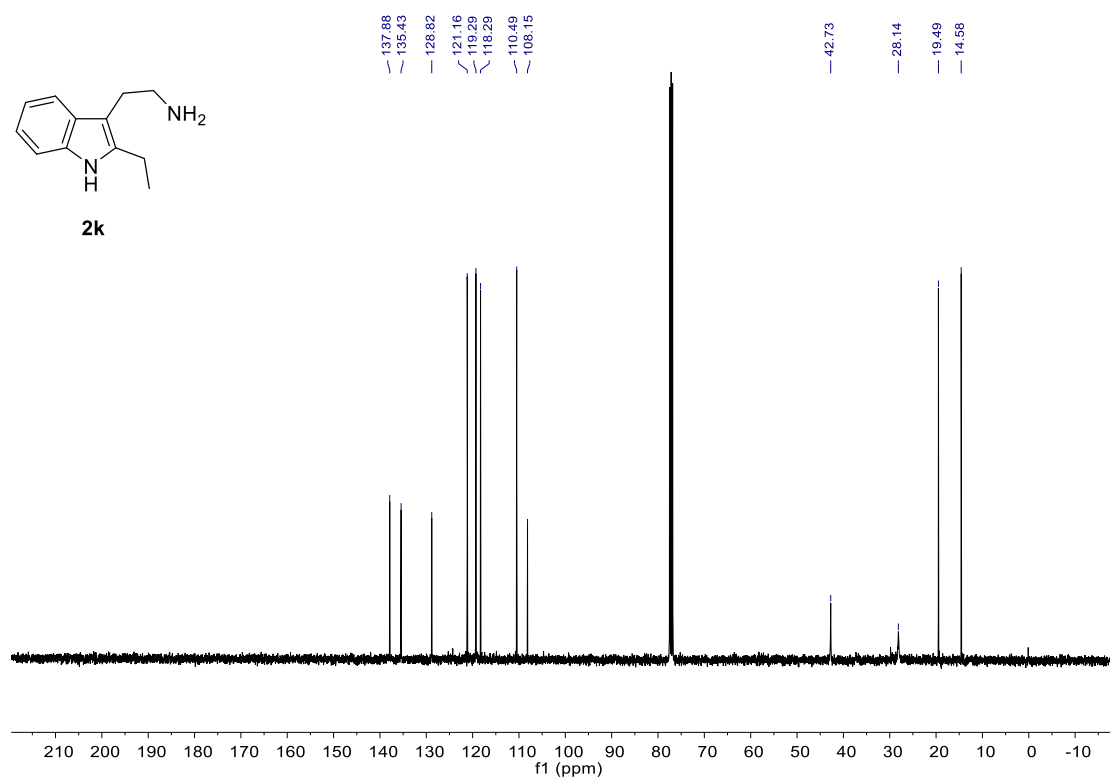

**$^1\text{H}$  NMR (400 MHz,  $\text{CDCl}_3$ , compound **2I**)**

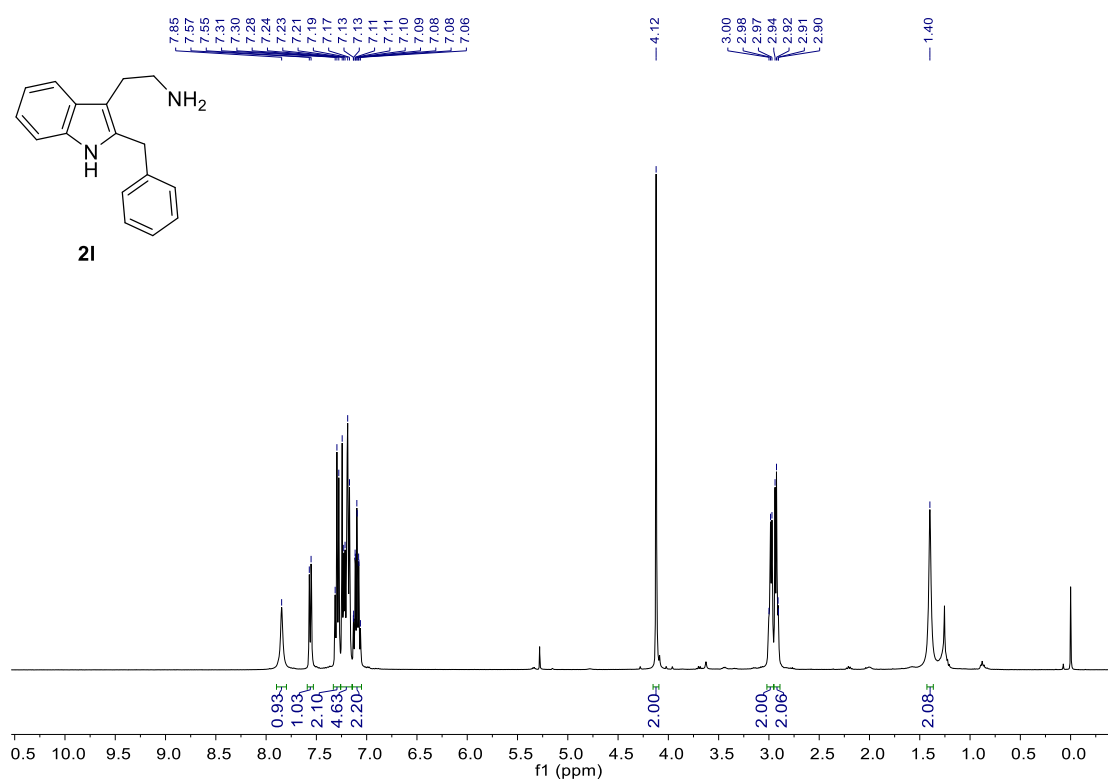

**$^{13}\text{C}$  NMR (100 MHz,  $\text{CDCl}_3$ , compound **2I**)**

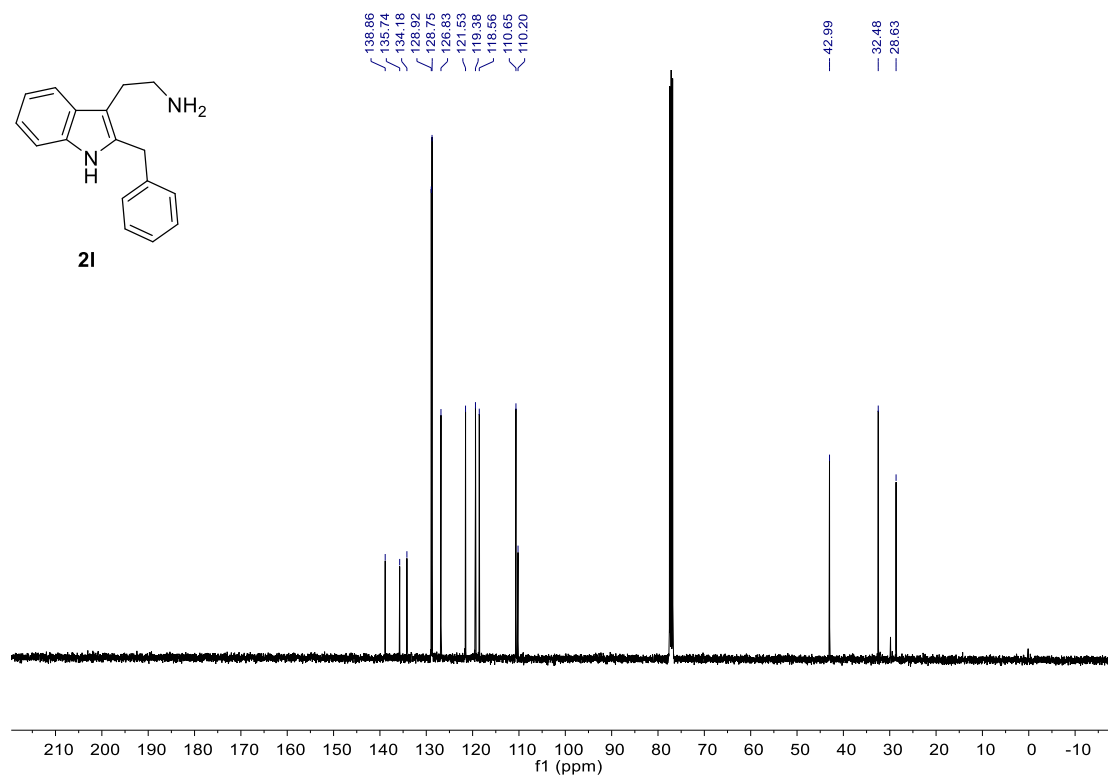

**<sup>1</sup>H NMR (400 MHz, CDCl<sub>3</sub>, compound **2m**)**

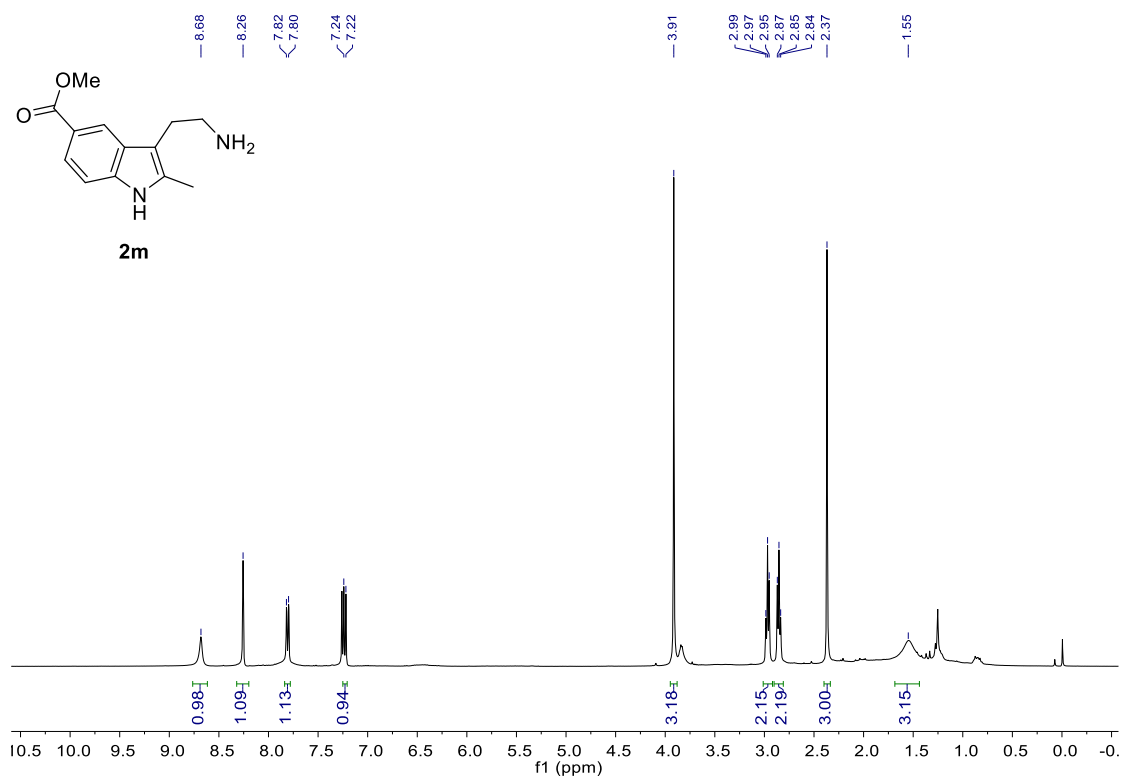

**<sup>13</sup>C NMR (100 MHz, CDCl<sub>3</sub>, compound **2m**)**

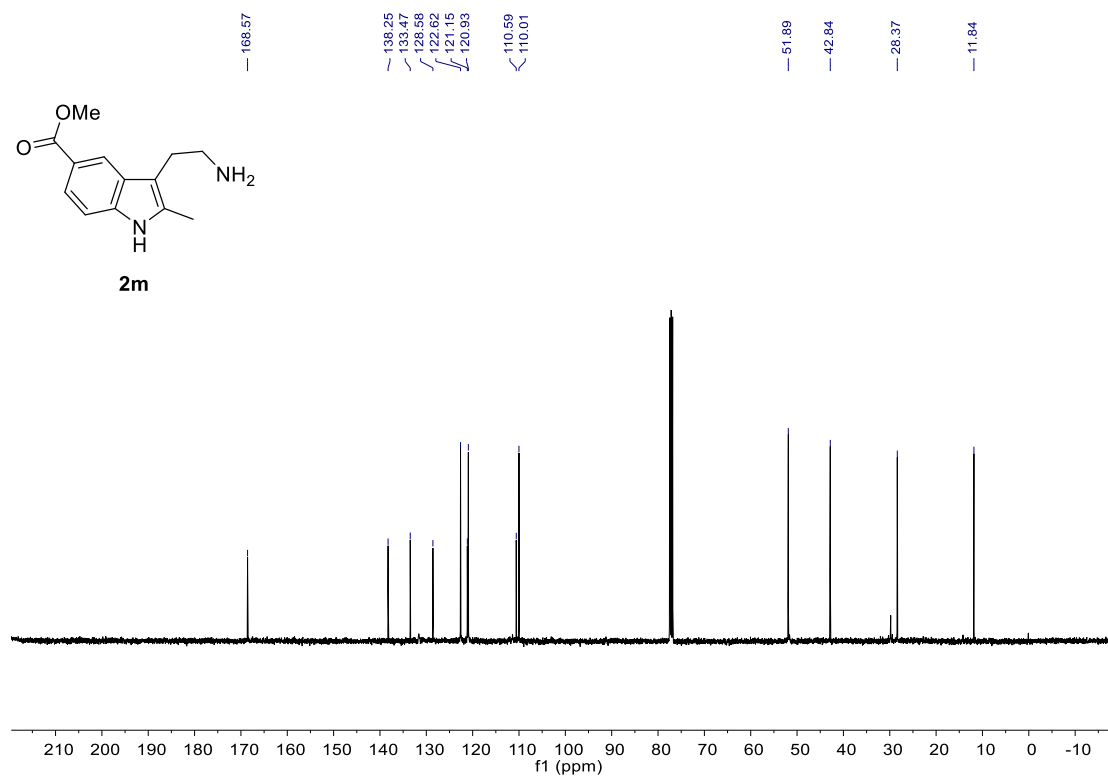

**$^1\text{H}$  NMR (400 MHz,  $\text{CDCl}_3$ , compound **2n**)**

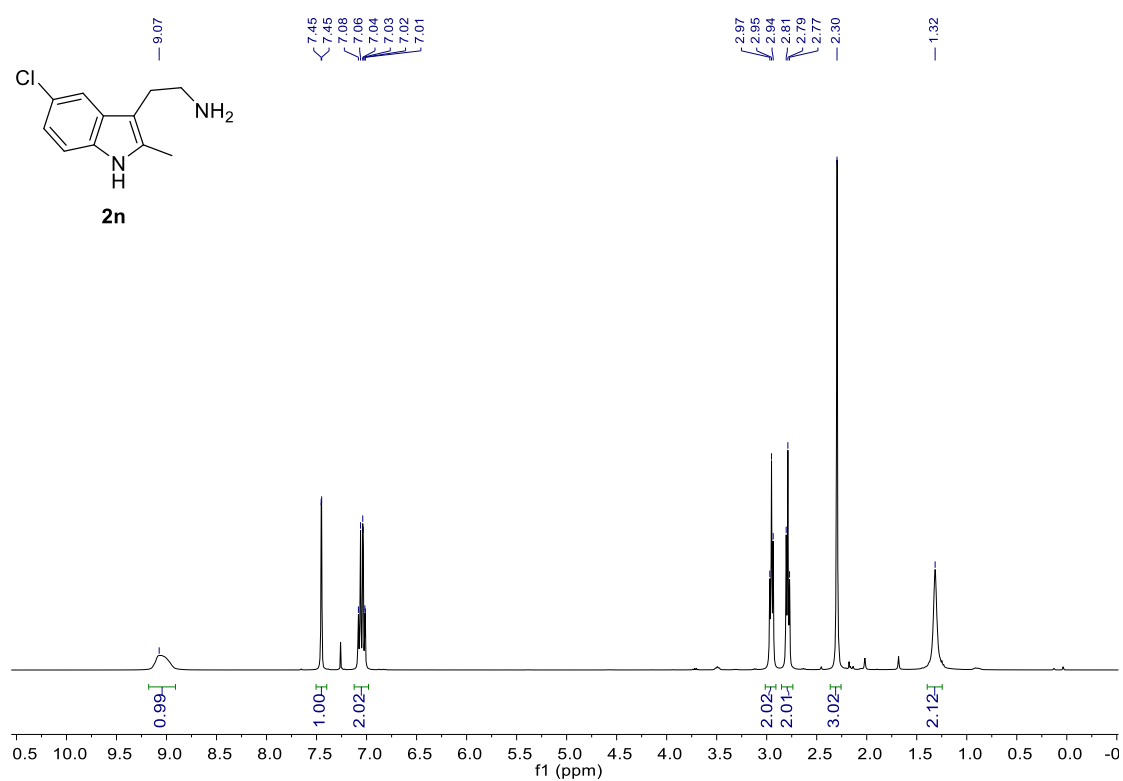

**$^{13}\text{C}$  NMR (100 MHz,  $\text{CDCl}_3$ , compound **2n**)**

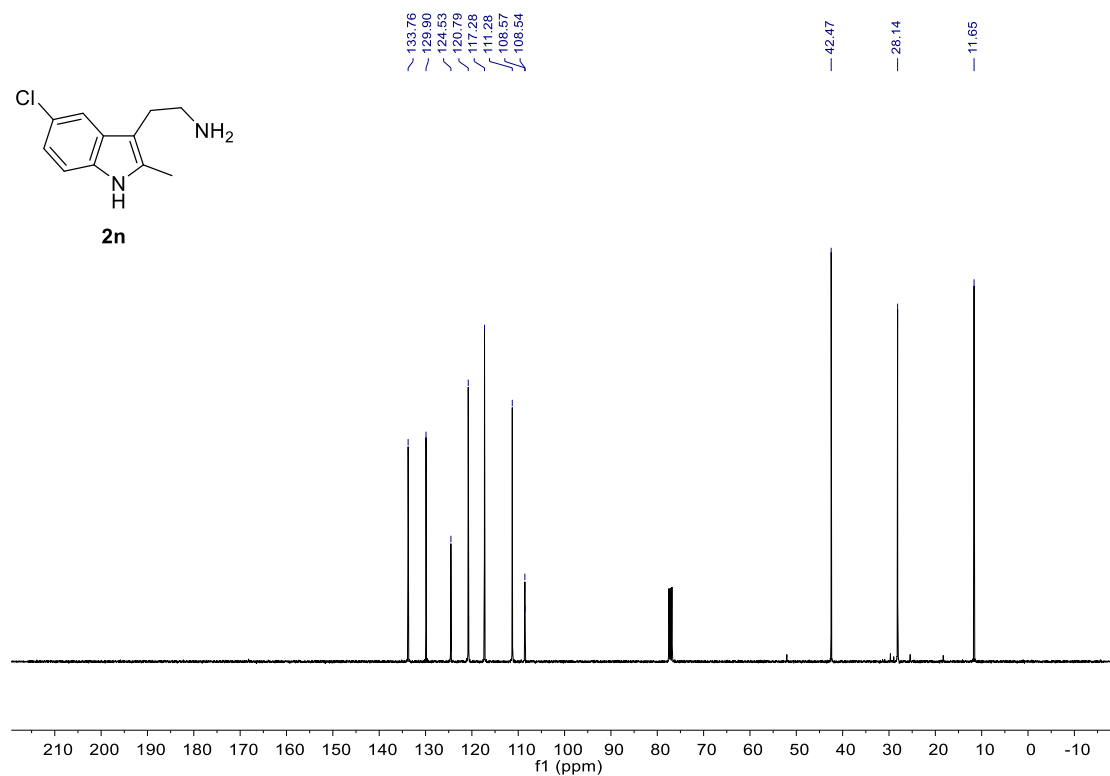

**$^1\text{H}$  NMR (400 MHz,  $\text{CDCl}_3$ , compound **2o**)**

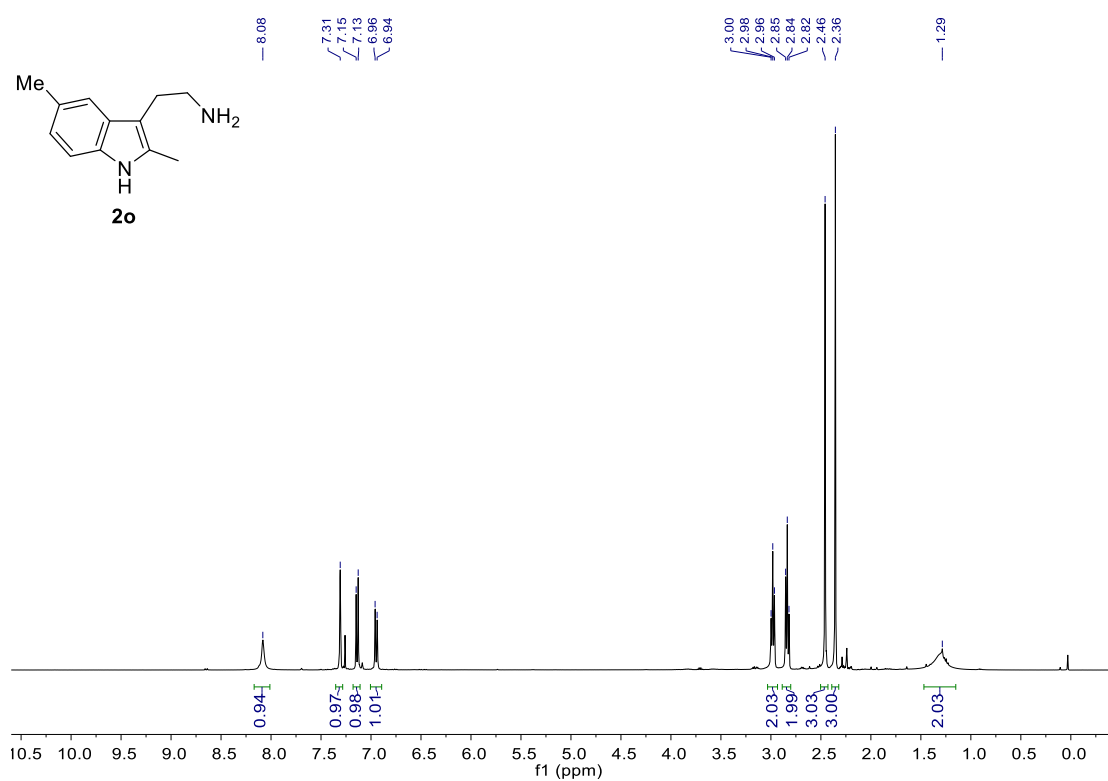

**$^{13}\text{C}$  NMR (100 MHz,  $\text{CDCl}_3$ , compound **2o**)**

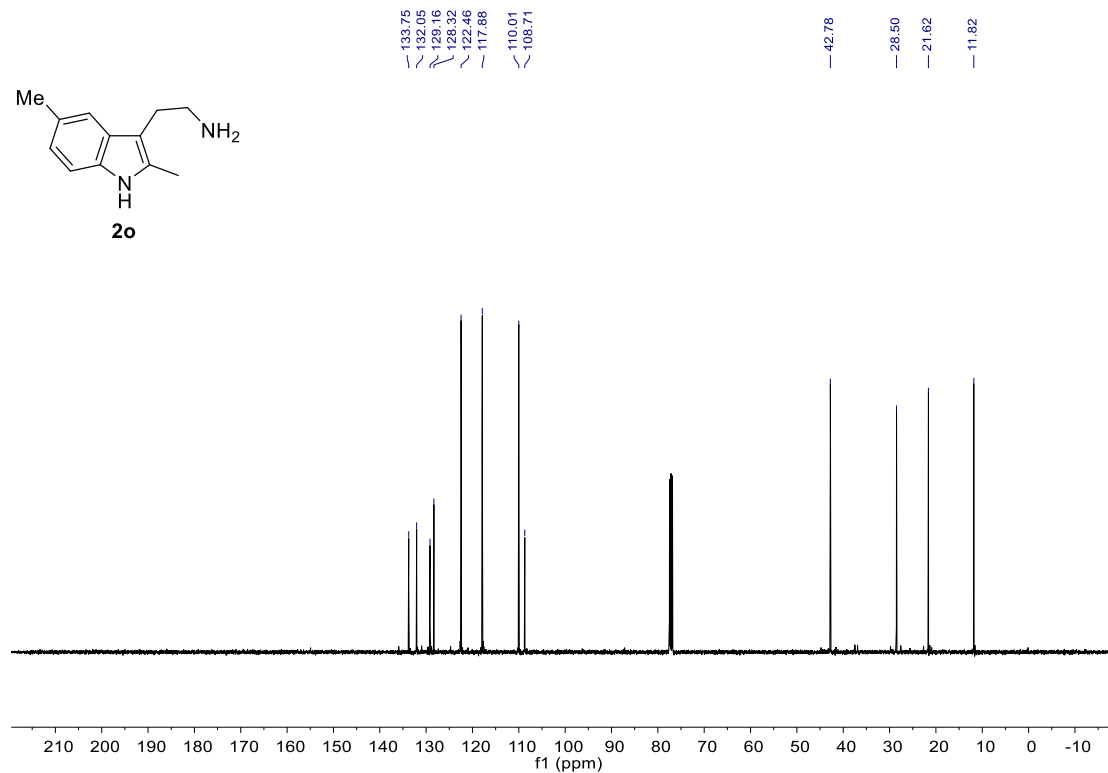

**<sup>1</sup>H NMR (400 MHz, CDCl<sub>3</sub>, compound **2p**)**

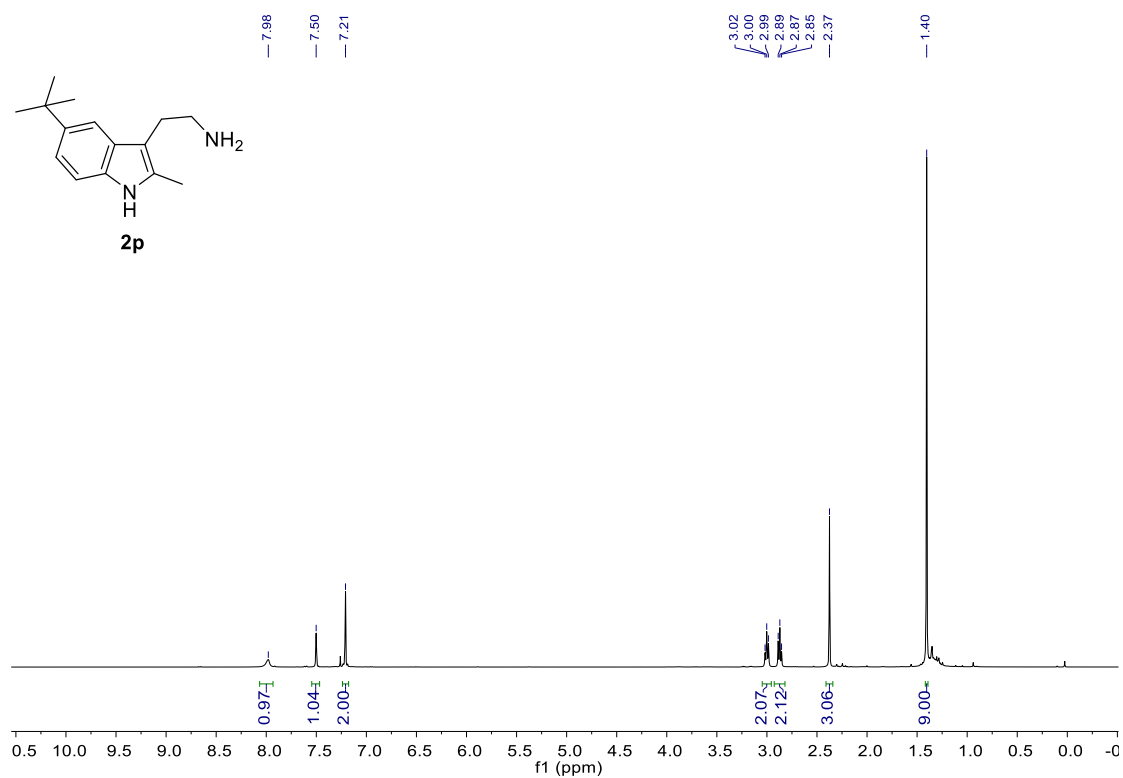

**<sup>13</sup>C NMR (100 MHz, CDCl<sub>3</sub>, compound **2p**)**

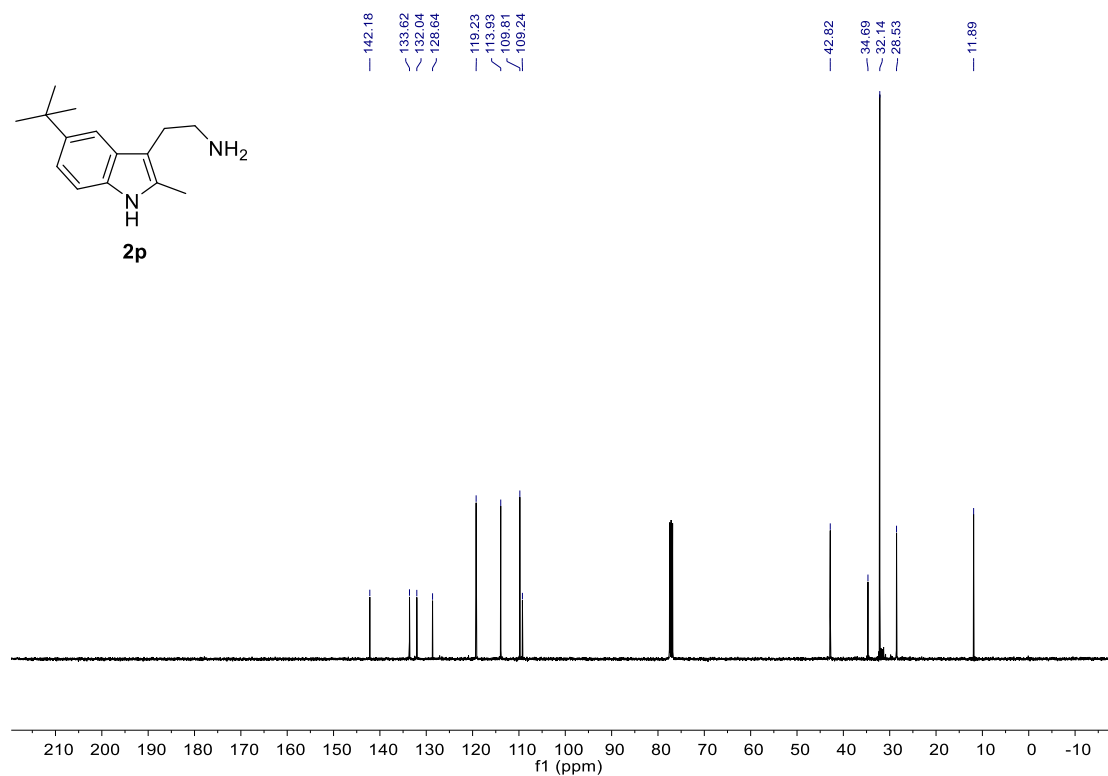

**<sup>1</sup>H NMR (400 MHz, CDCl<sub>3</sub>, compound **2q**)**

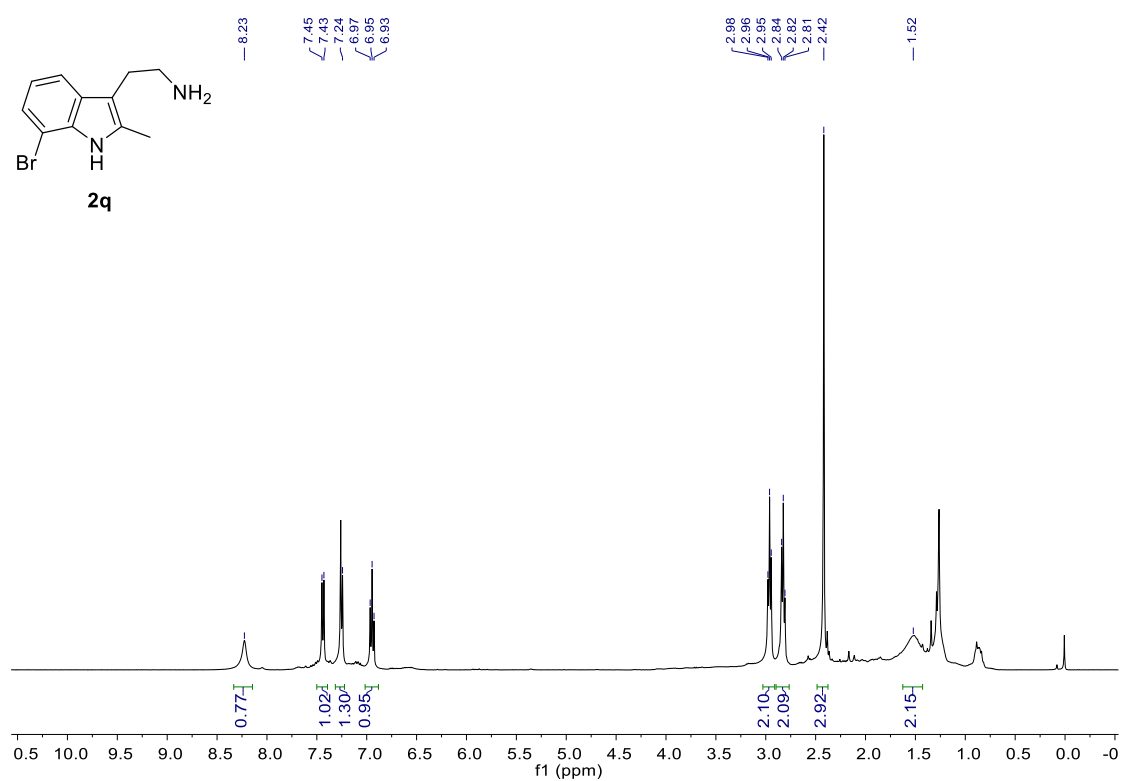

**<sup>13</sup>C NMR (100 MHz, CDCl<sub>3</sub>, compound **2q**)**

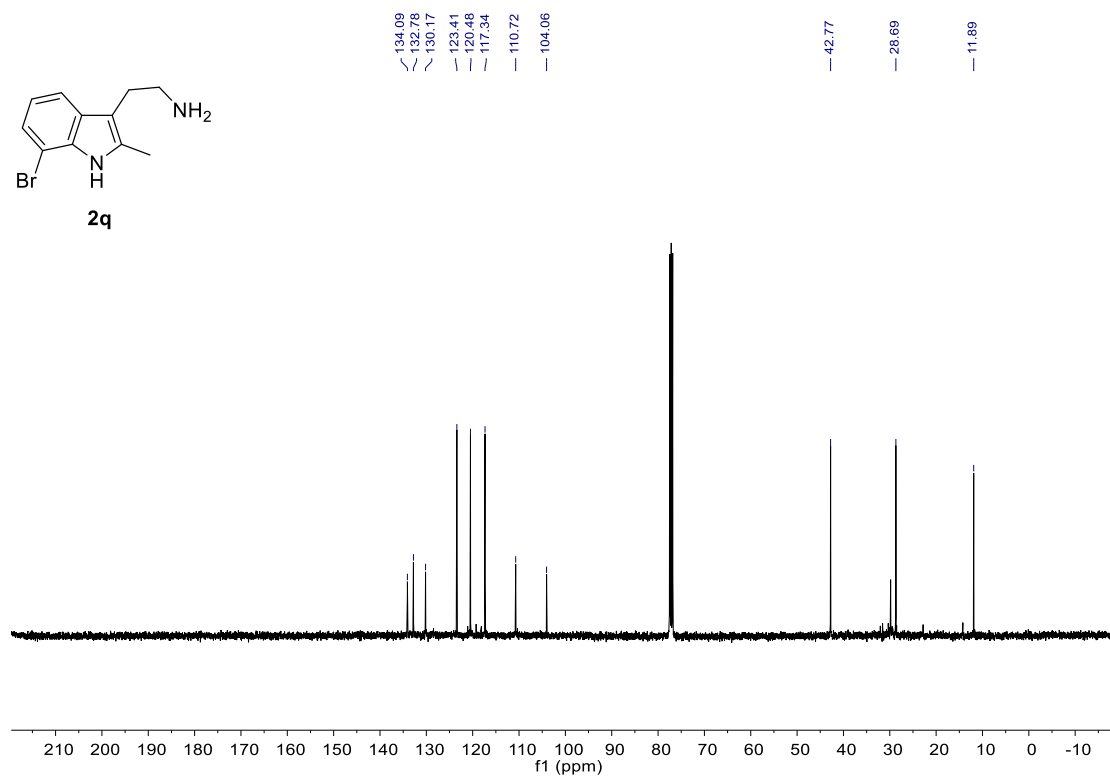

**$^1\text{H}$  NMR (400 MHz,  $\text{CDCl}_3$ , compound **2r**)**

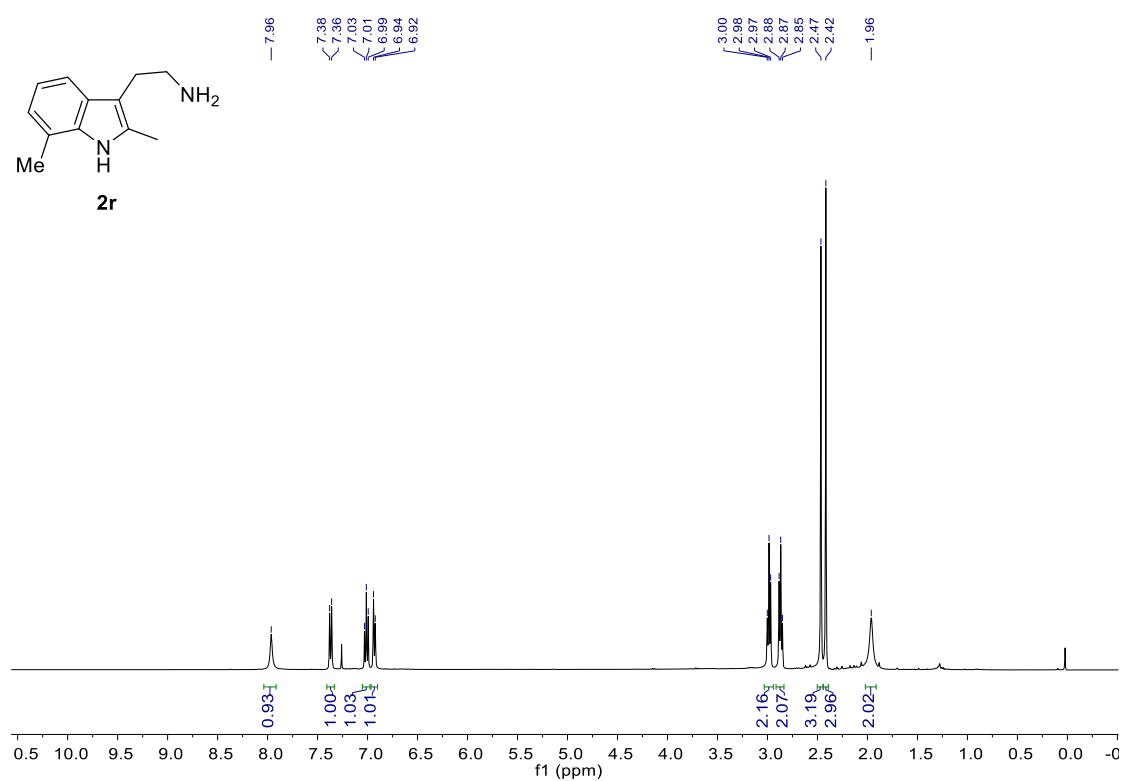

**$^{13}\text{C}$  NMR (100 MHz,  $\text{CDCl}_3$ , compound **2r**)**

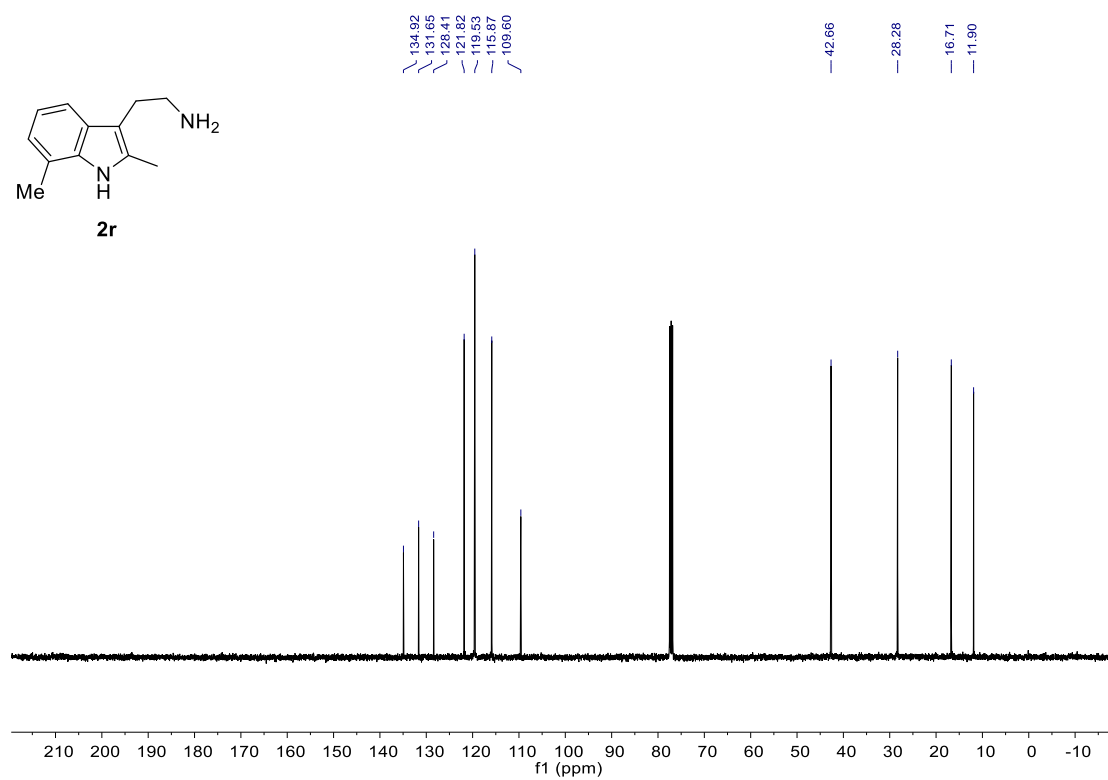

**$^1\text{H}$  NMR (400 MHz,  $\text{CDCl}_3$ , compound **2s**)**

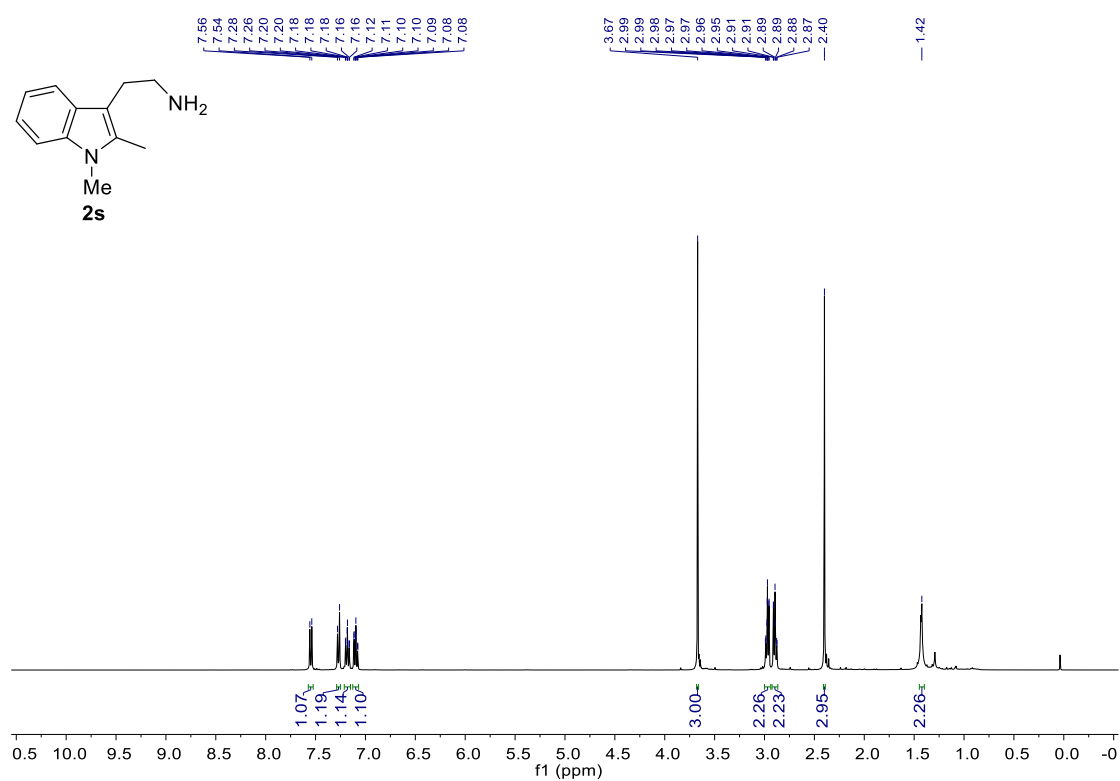

**$^{13}\text{C}$  NMR (100 MHz,  $\text{CDCl}_3$ , compound **2s**)**

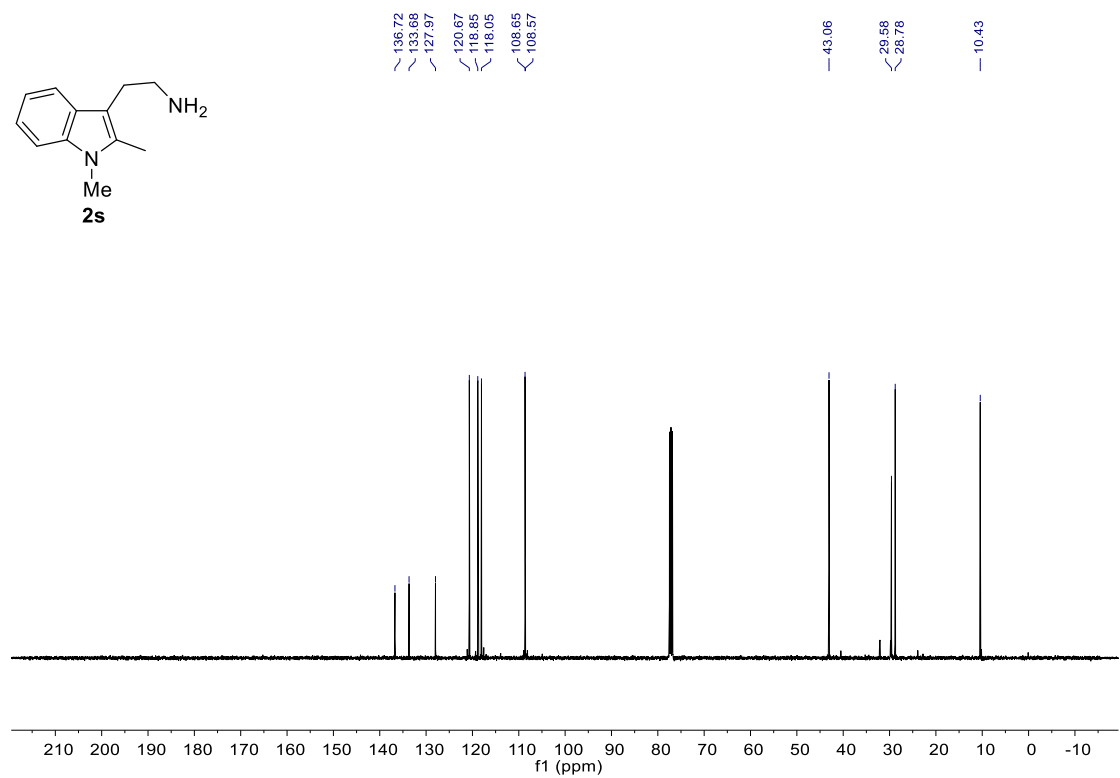

**$^1\text{H}$  NMR (400 MHz,  $\text{CDCl}_3$ , compound **2t**)**

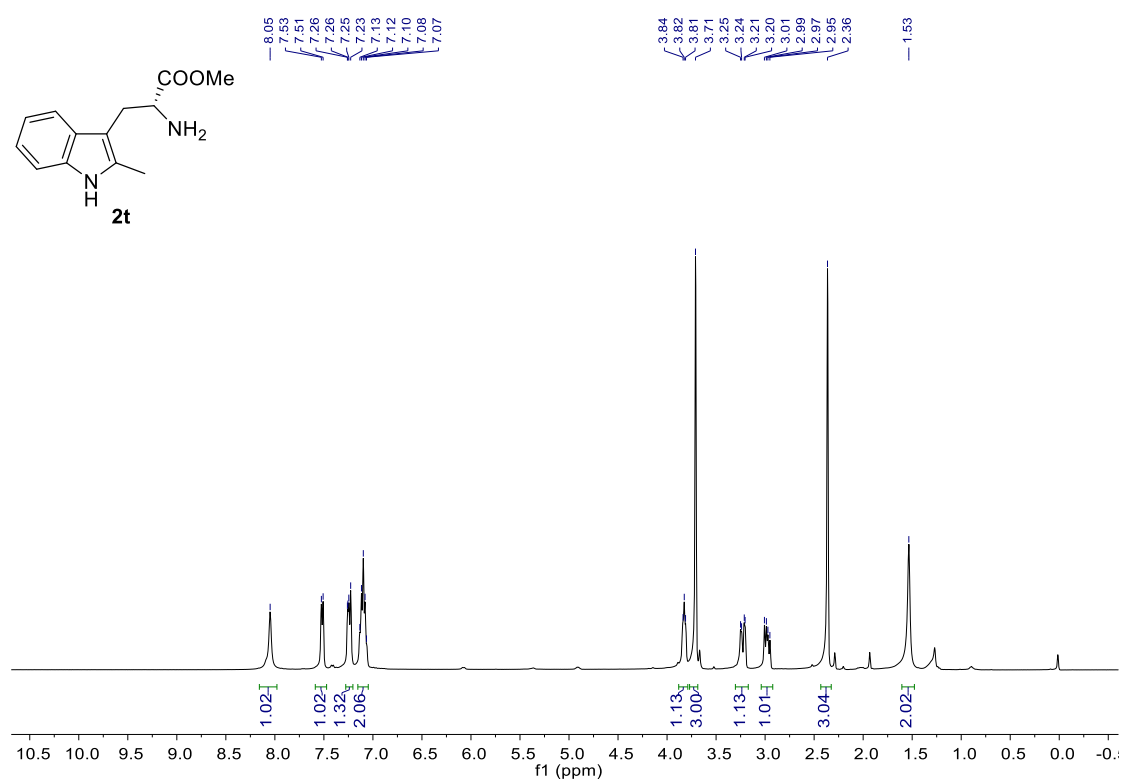

**$^{13}\text{C}$  NMR (100 MHz,  $\text{CDCl}_3$ , compound **2t**)**

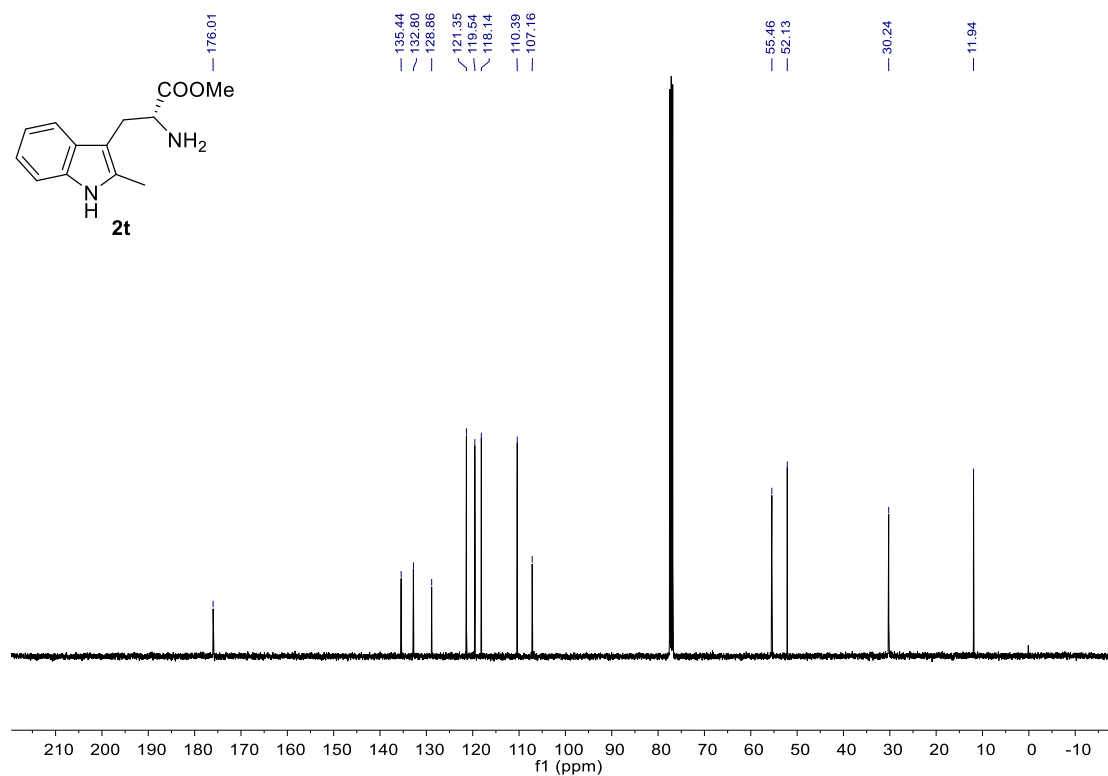

**<sup>1</sup>H NMR (400 MHz, Methanol-*d*<sub>4</sub>, compound **2u**)**

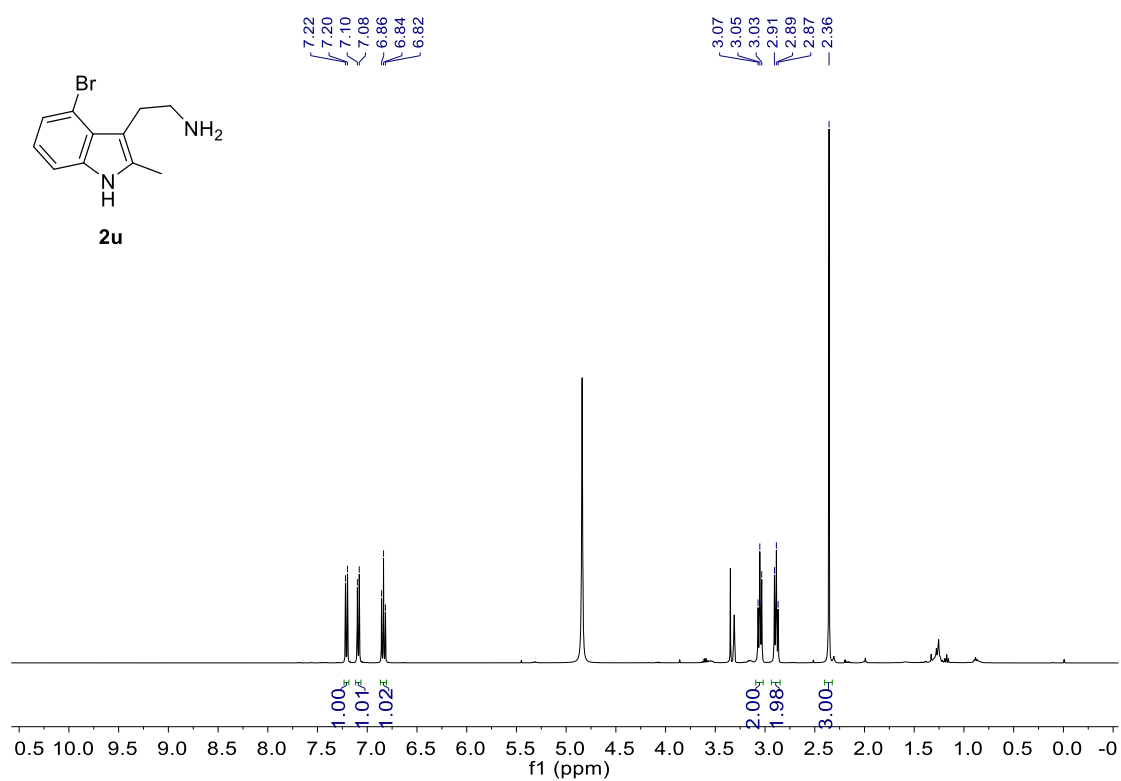

**<sup>13</sup>C NMR (100 MHz, Methanol-*d*<sub>4</sub>, compound **2u**)**

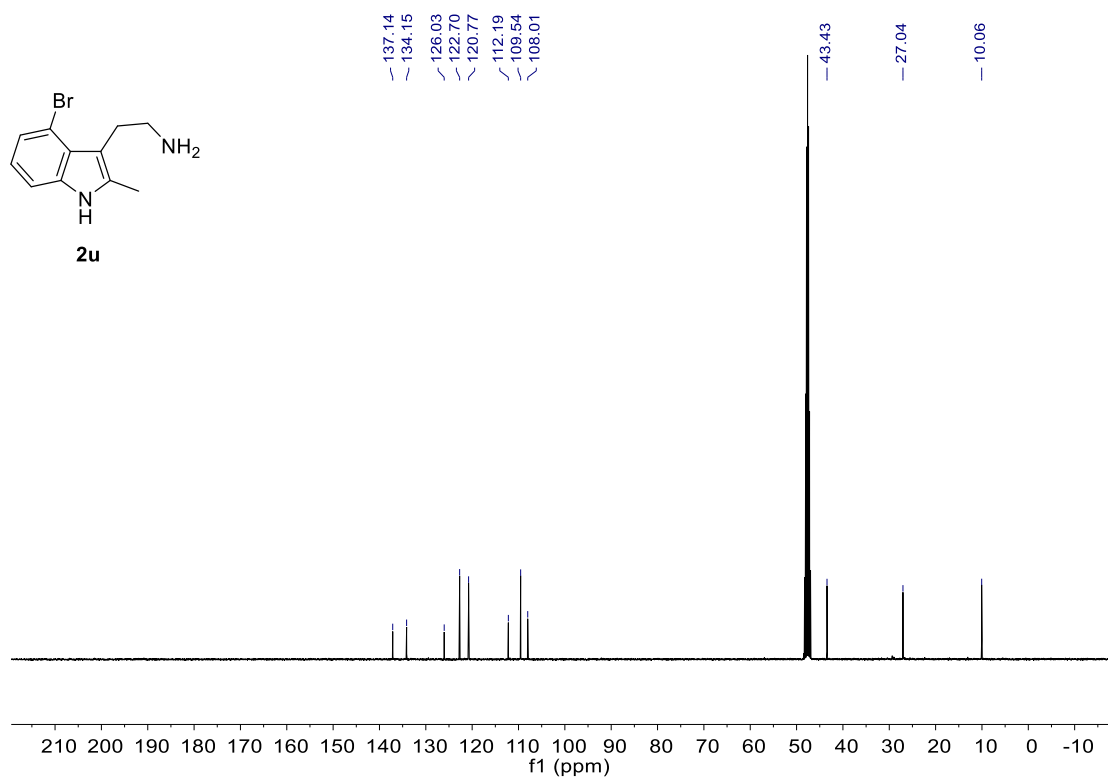

**<sup>1</sup>H NMR (400 MHz, Methanol-*d*<sub>4</sub>, compound **2w**)**

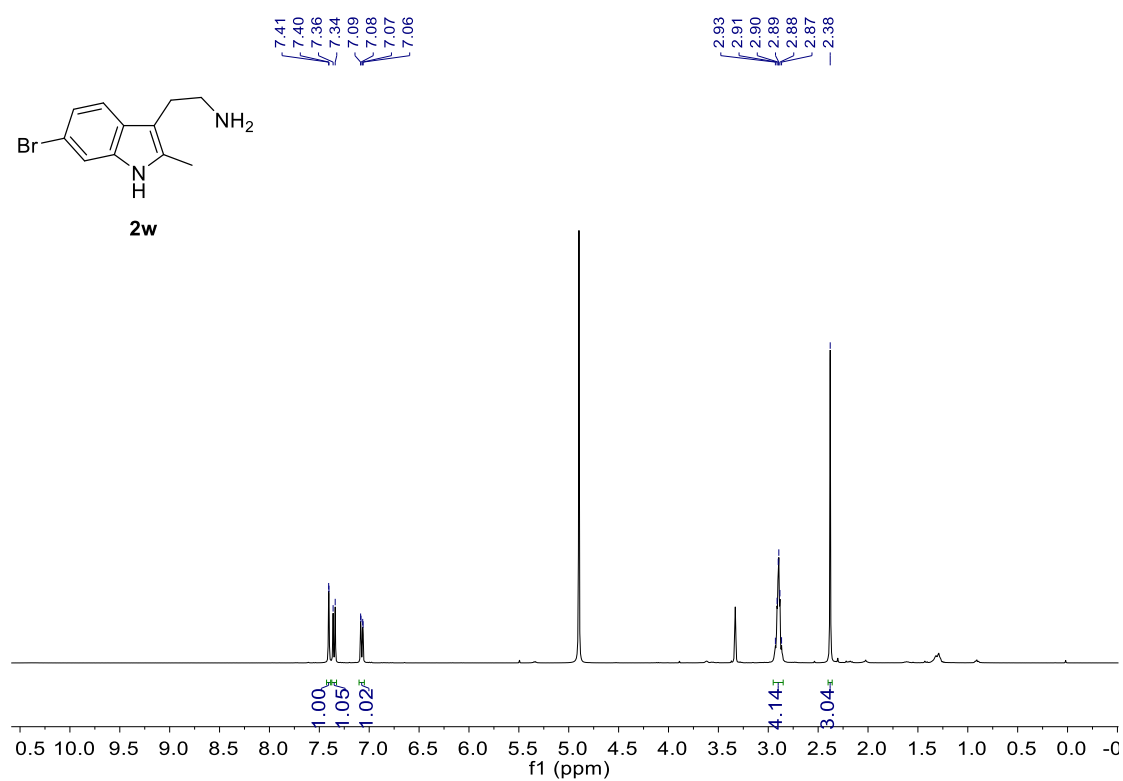

**<sup>13</sup>C NMR (100 MHz, Methanol-*d*<sub>4</sub>, compound **2w**)**

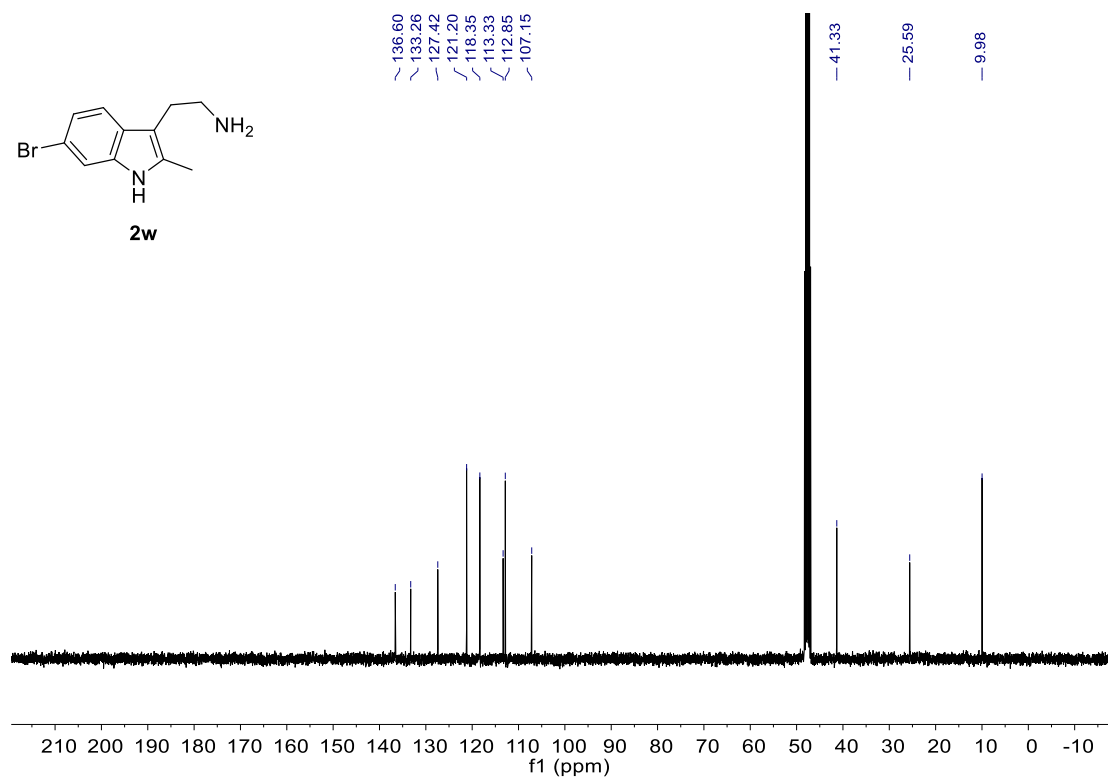

**$^1\text{H}$  NMR (400 MHz,  $\text{CDCl}_3$ , compound **4a**)**

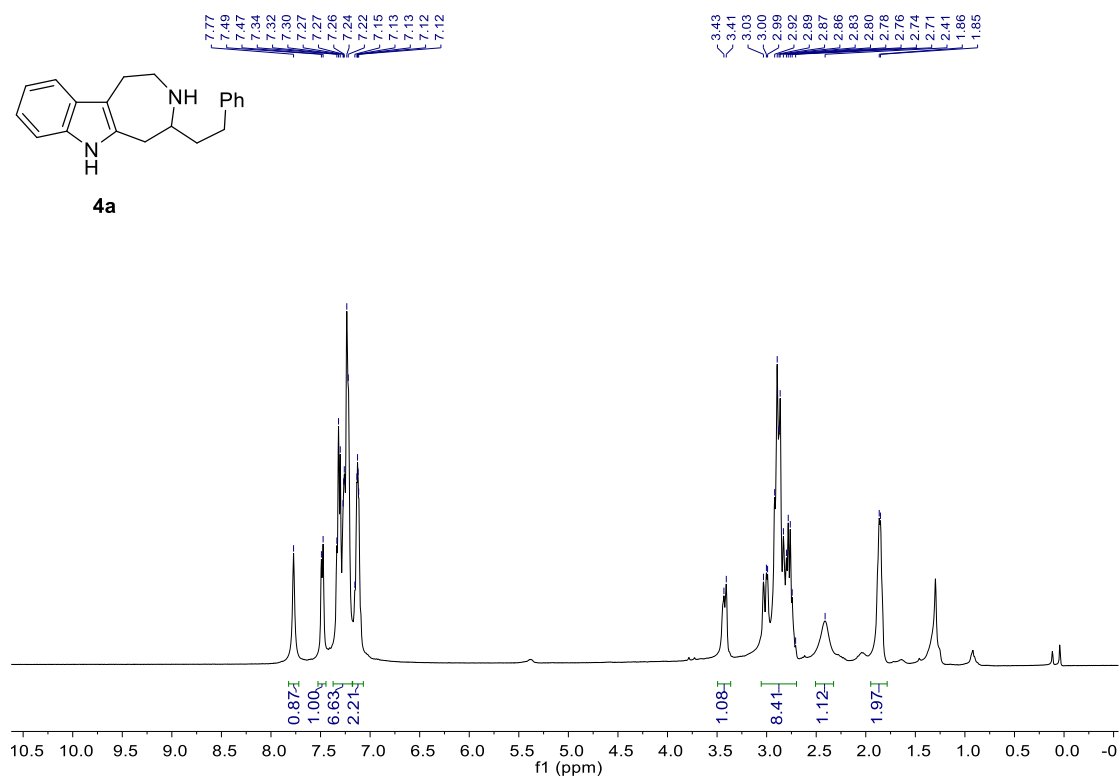

**$^{13}\text{C}$  NMR (100 MHz,  $\text{CDCl}_3$ , compound **4a**)**

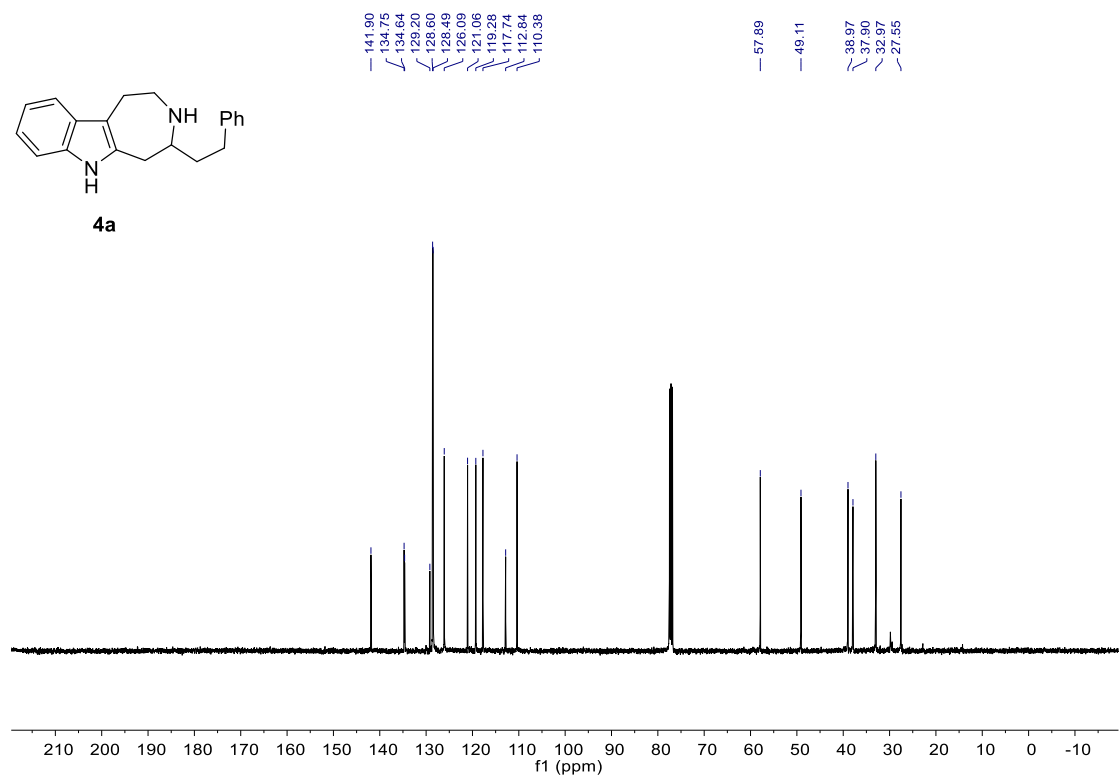

**$^1\text{H}$  NMR (400 MHz,  $\text{CDCl}_3$ , compound **4b**)**

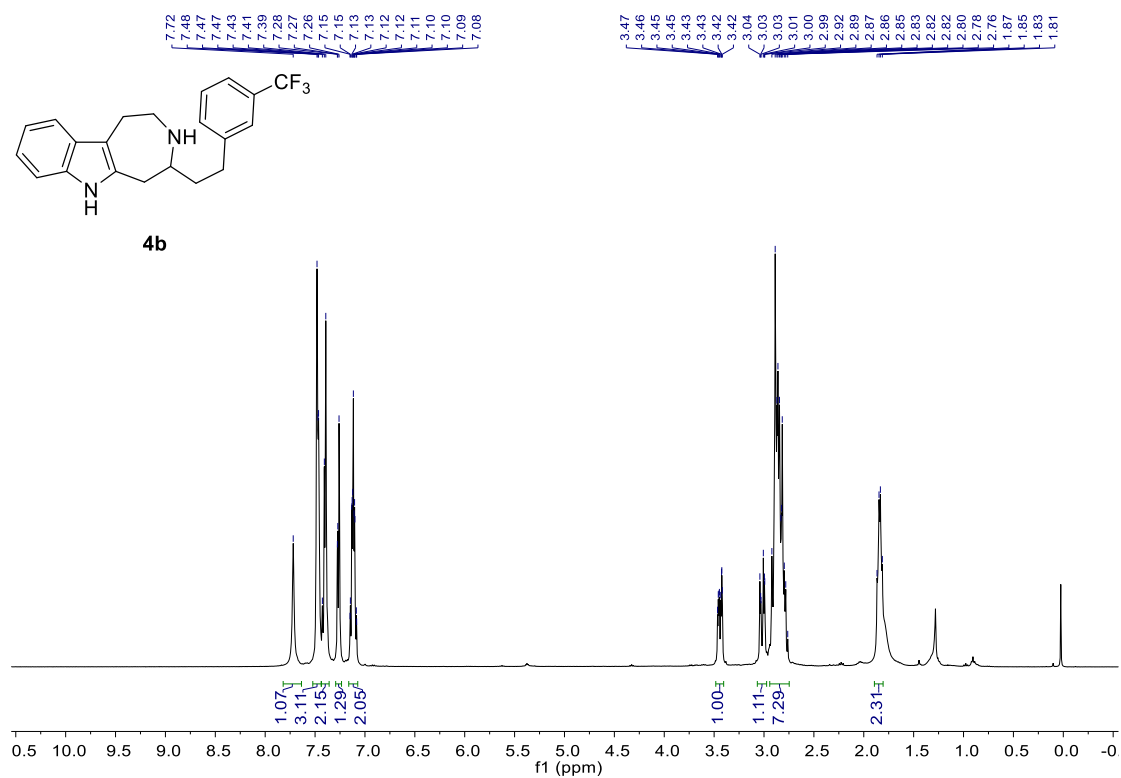

**$^{13}\text{C}$  NMR (100 MHz,  $\text{CDCl}_3$ , compound **2b**)**

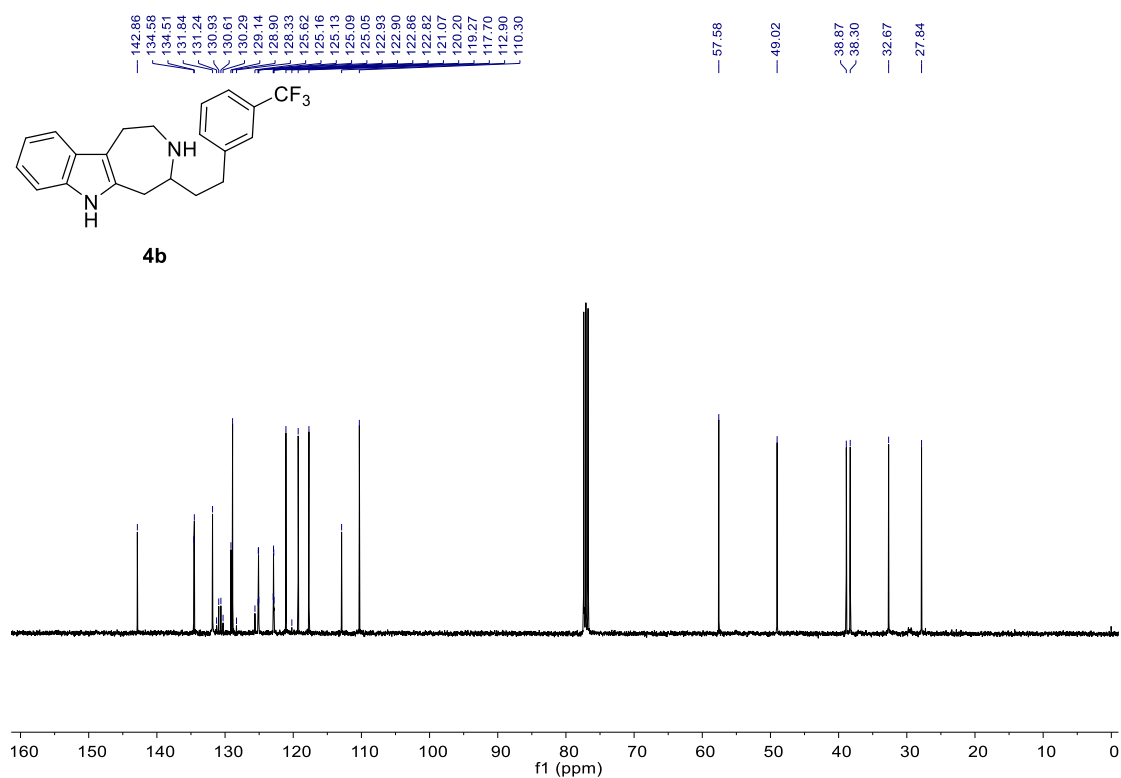

**$^{19}\text{F}$  NMR (376 MHz,  $\text{CDCl}_3$ , compound **4b**)**

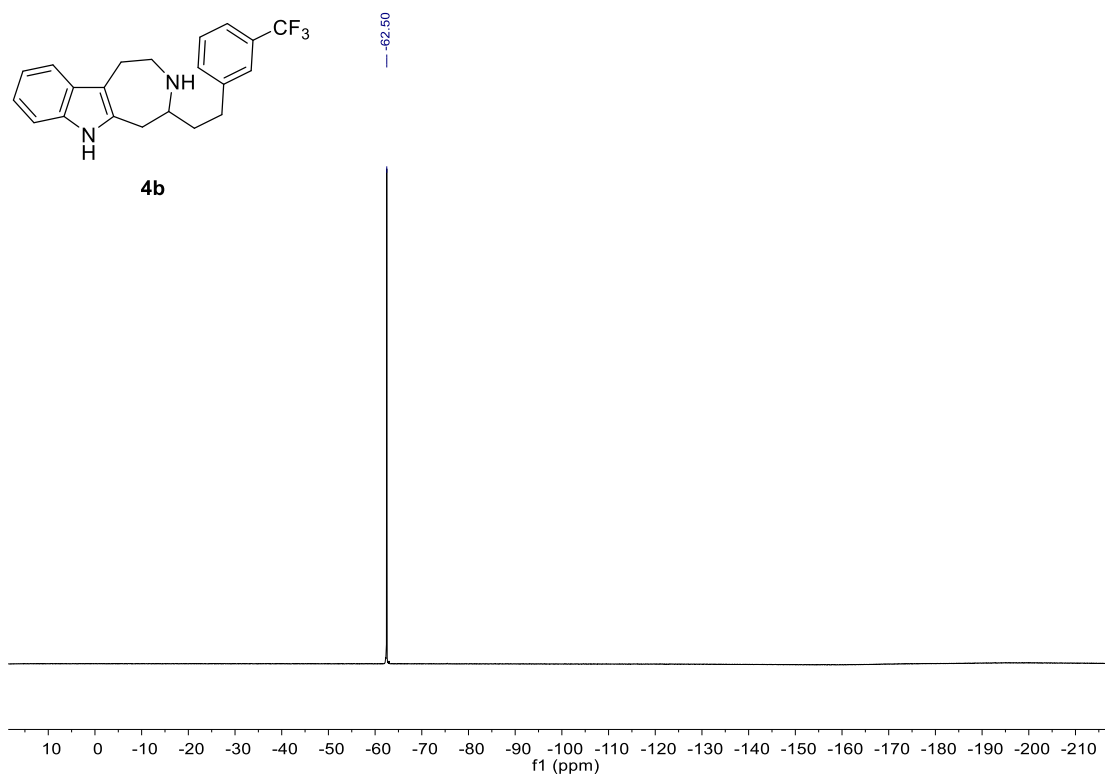

**$^1\text{H}$  NMR (400 MHz,  $\text{CDCl}_3$ , compound **4c**)**

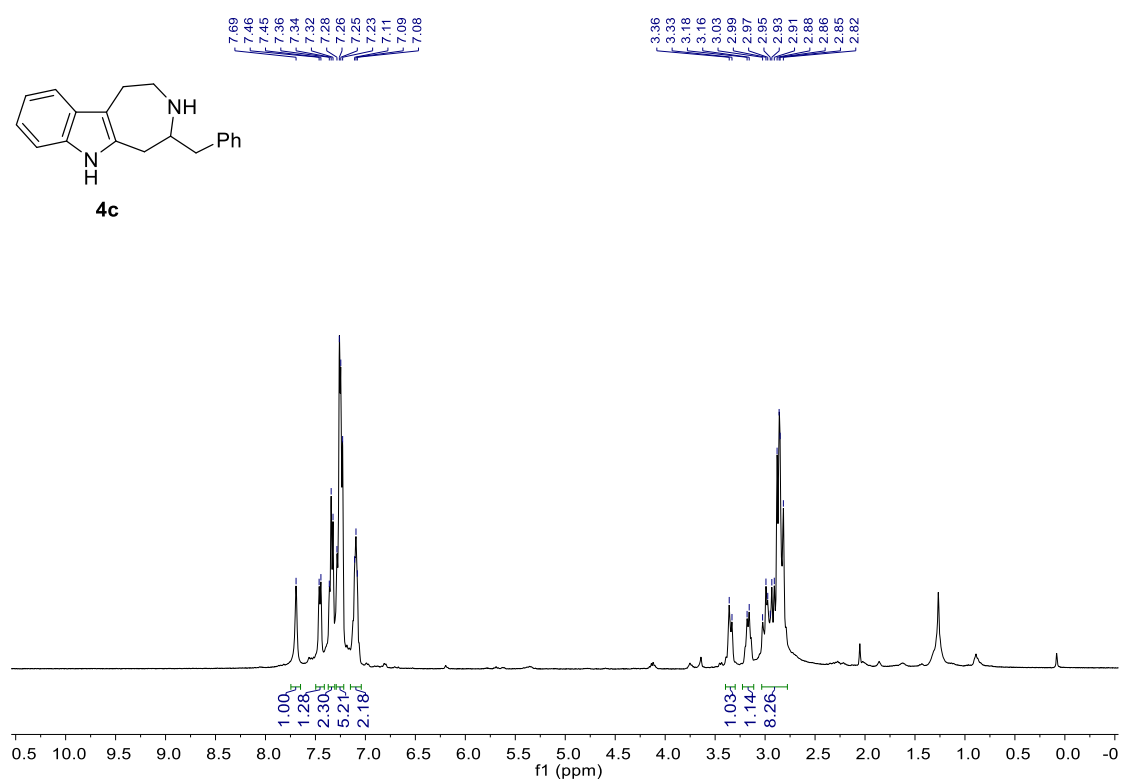

**$^{13}\text{C}$  NMR (100 MHz,  $\text{CDCl}_3$ , compound **4c**)**

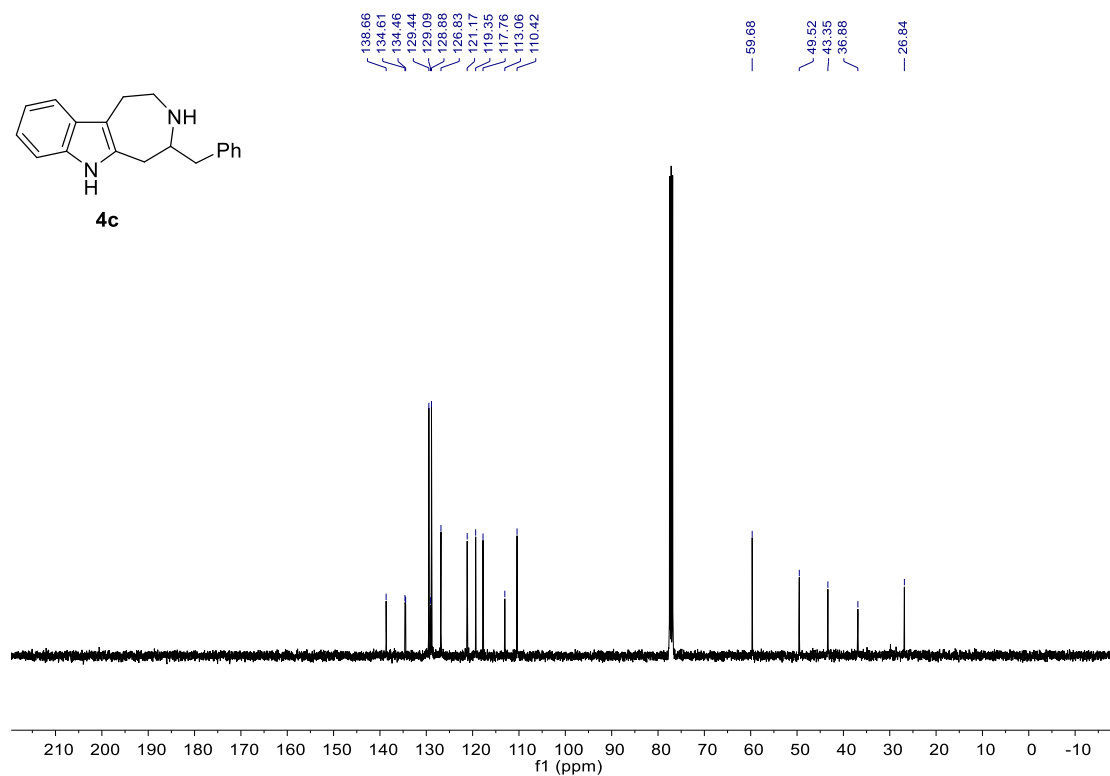

**<sup>1</sup>H NMR (400 MHz, CDCl<sub>3</sub>, compound 4d)**

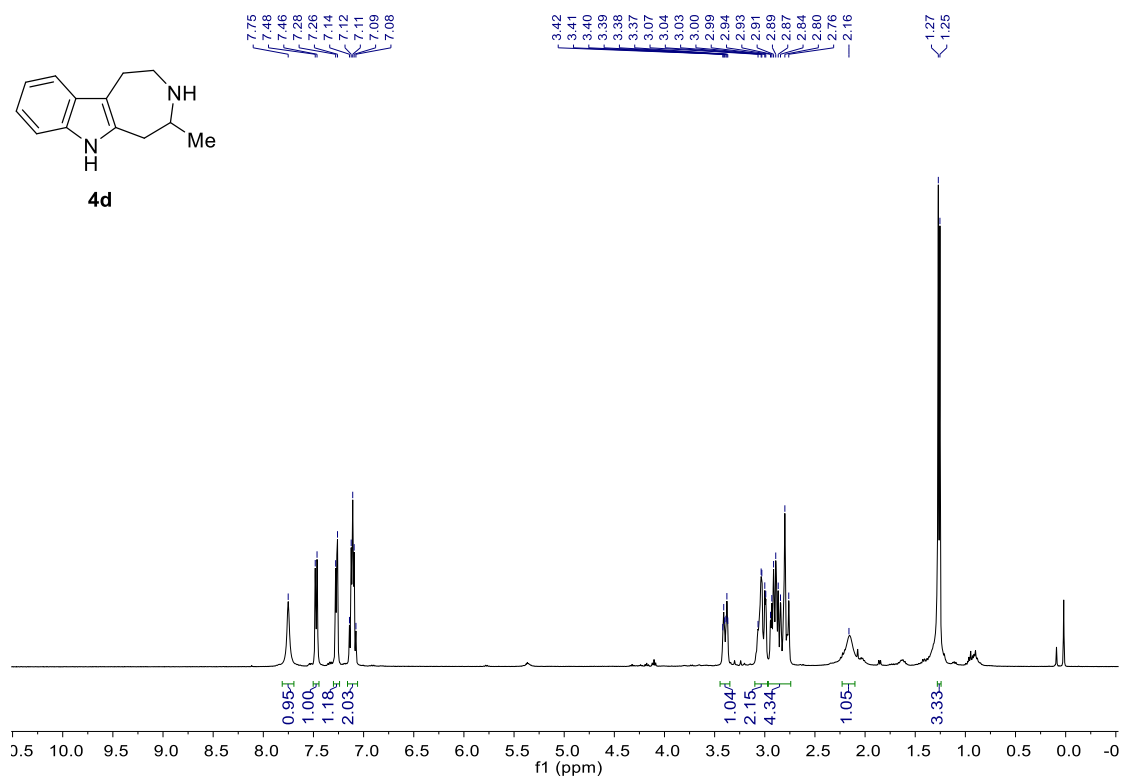

**<sup>13</sup>C NMR (100 MHz, CDCl<sub>3</sub>, compound 4d)**

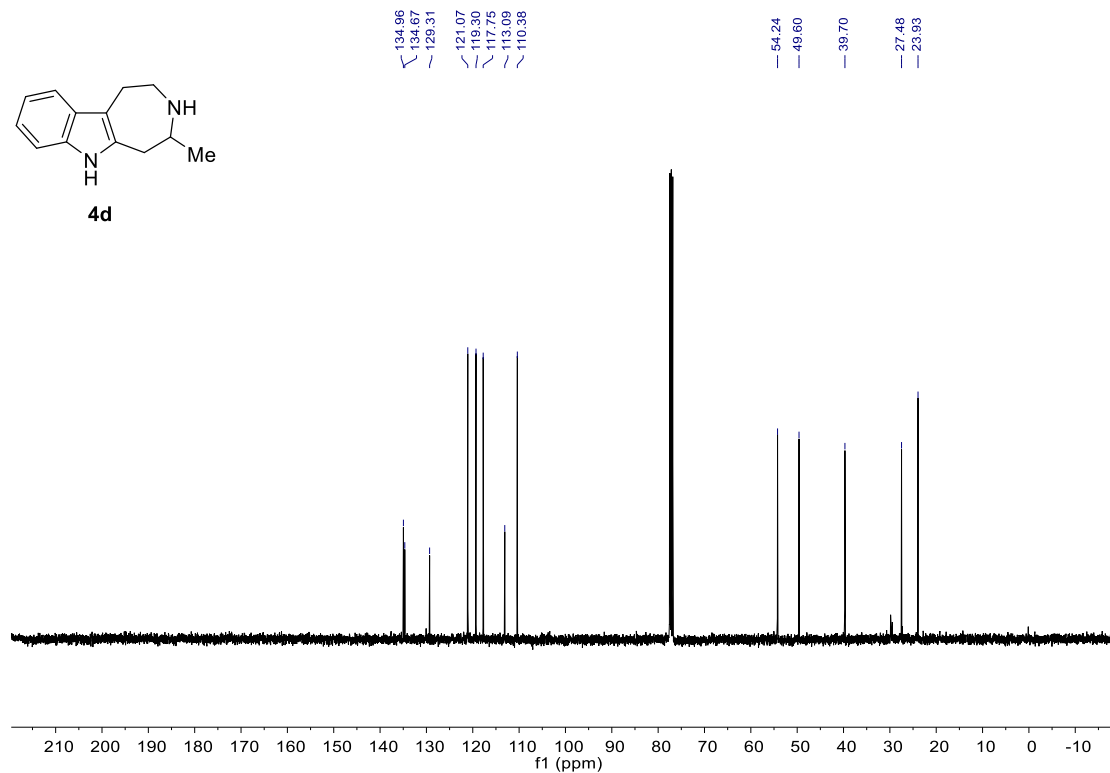

**$^1\text{H}$  NMR (400 MHz,  $\text{CDCl}_3$ , compound **4e**)**

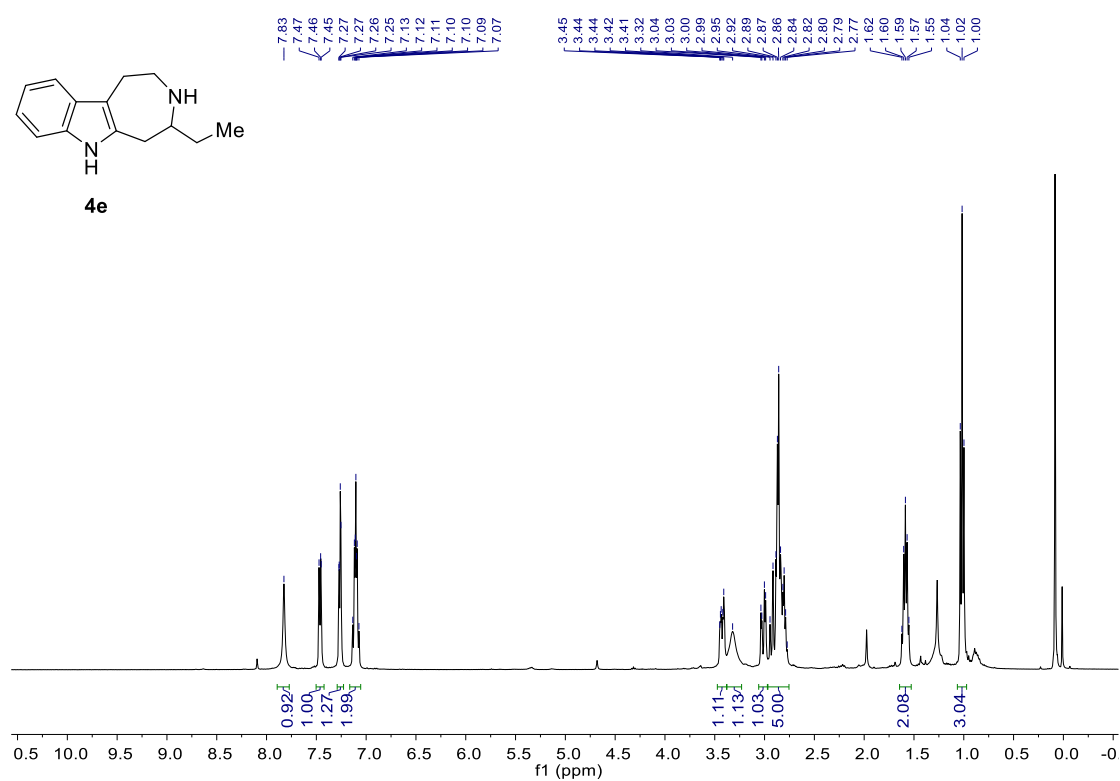

**$^{13}\text{C}$  NMR (100 MHz,  $\text{CDCl}_3$ , compound **4e**)**

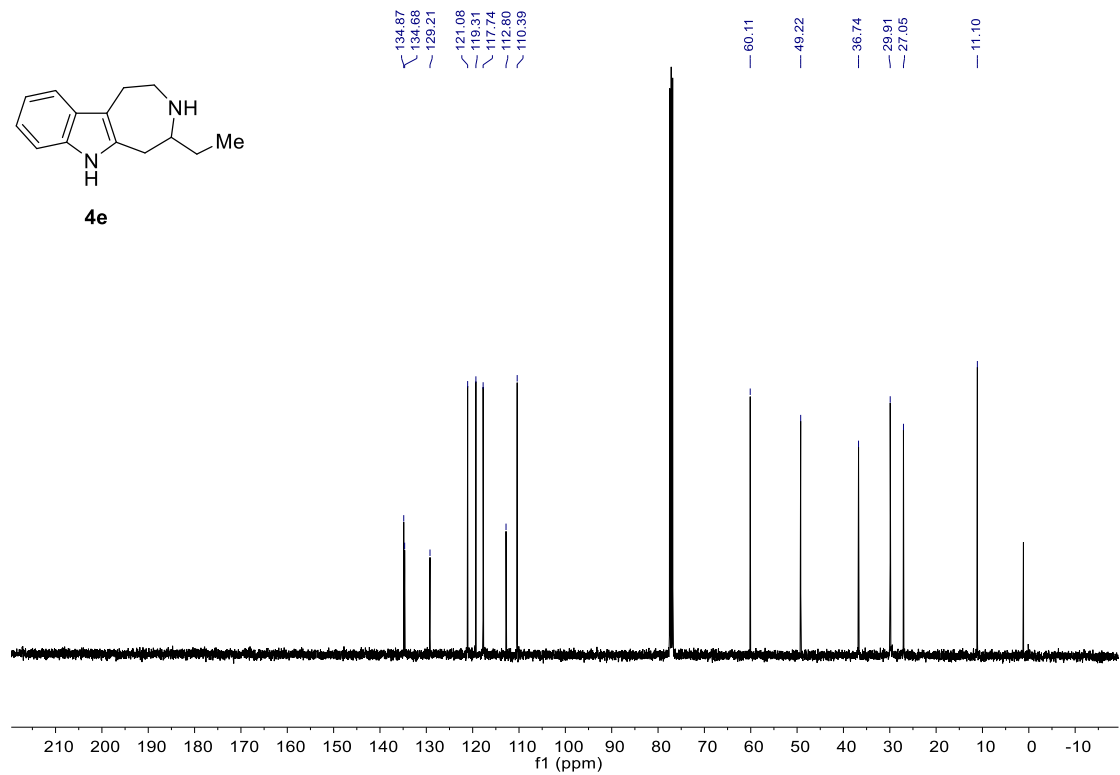

**$^1\text{H}$  NMR (400 MHz,  $\text{CDCl}_3$ , compound **4f**)**

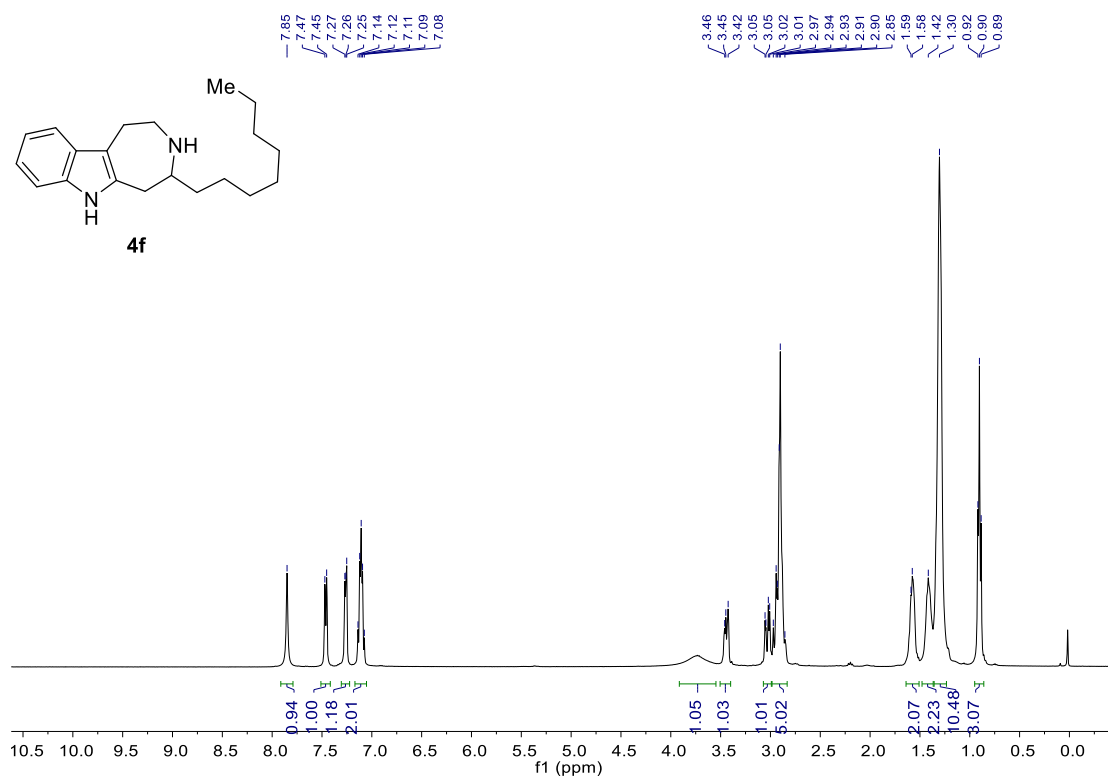

**$^{13}\text{C}$  NMR (100 MHz,  $\text{CDCl}_3$ , compound **4f**)**

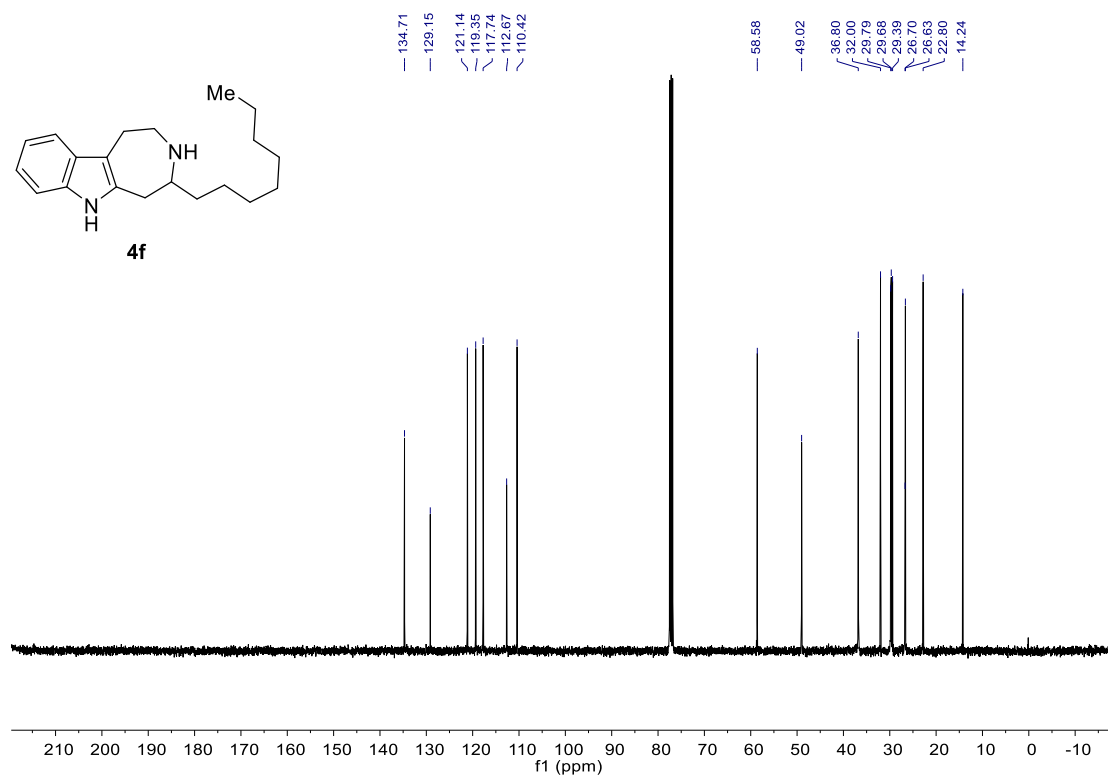

**$^1\text{H}$  NMR (400 MHz,  $\text{CDCl}_3$ , compound **4g**)**

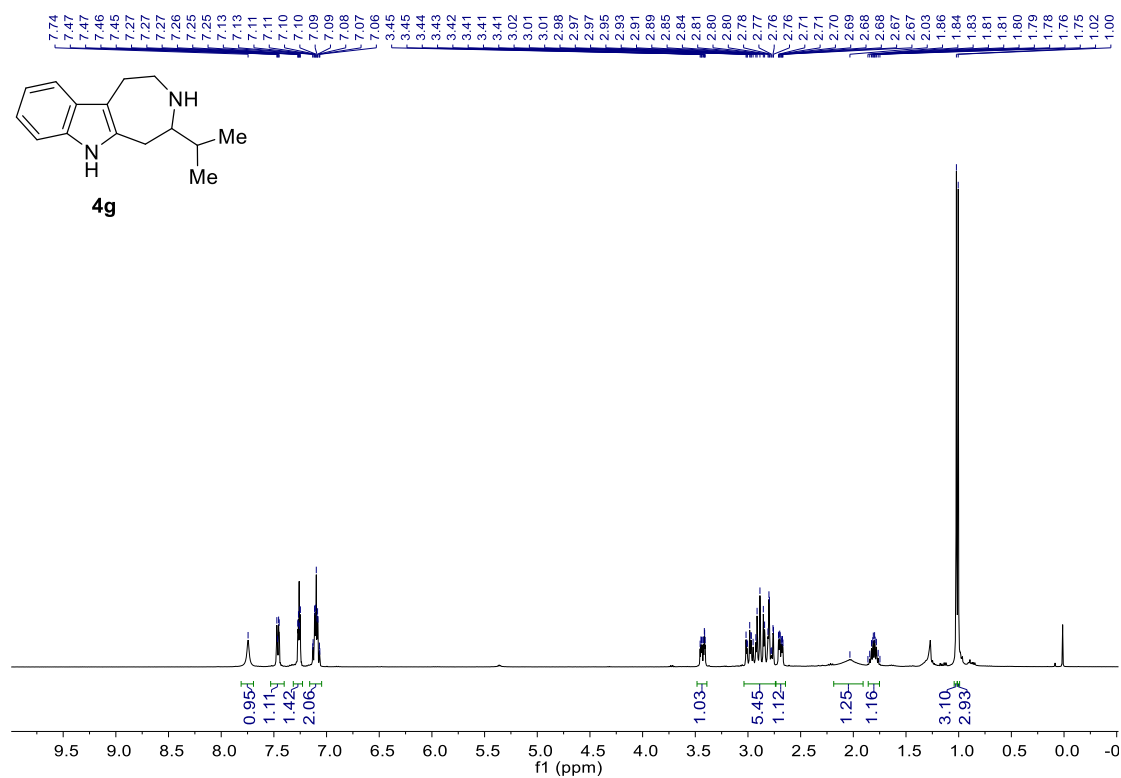

**$^{13}\text{C}$  NMR (100 MHz,  $\text{CDCl}_3$ , compound **4g**)**

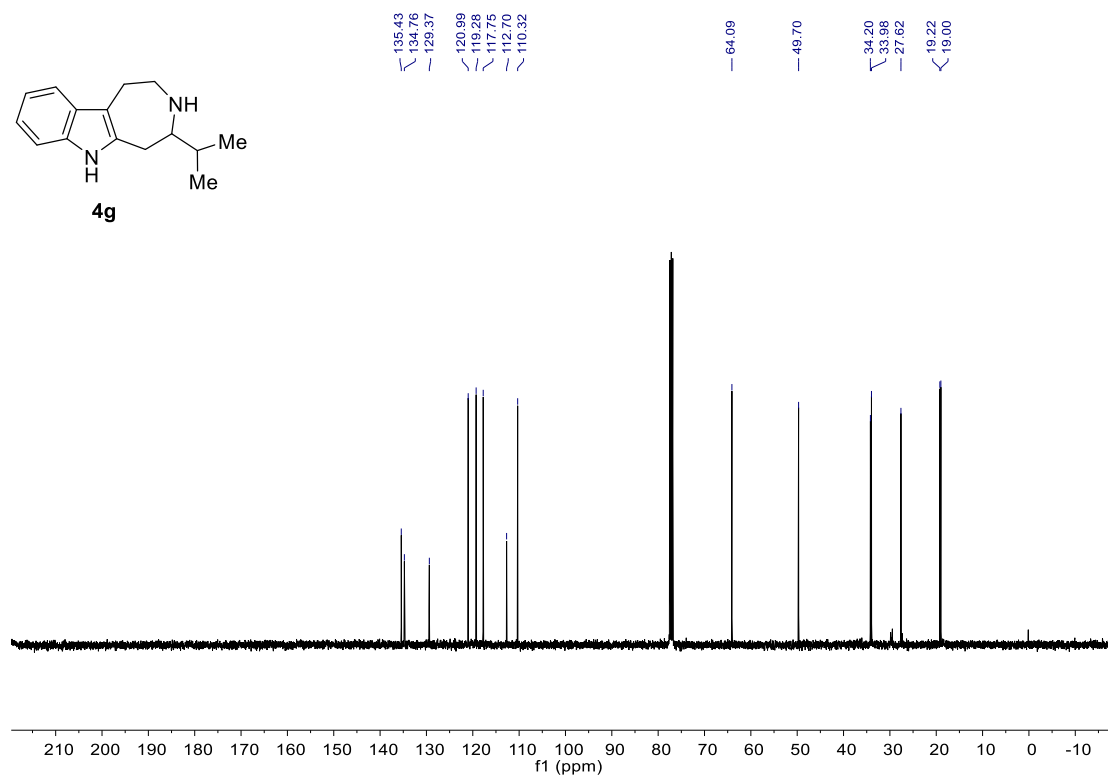

**$^1\text{H}$  NMR (400 MHz,  $\text{CDCl}_3$ , compound **4h**)**

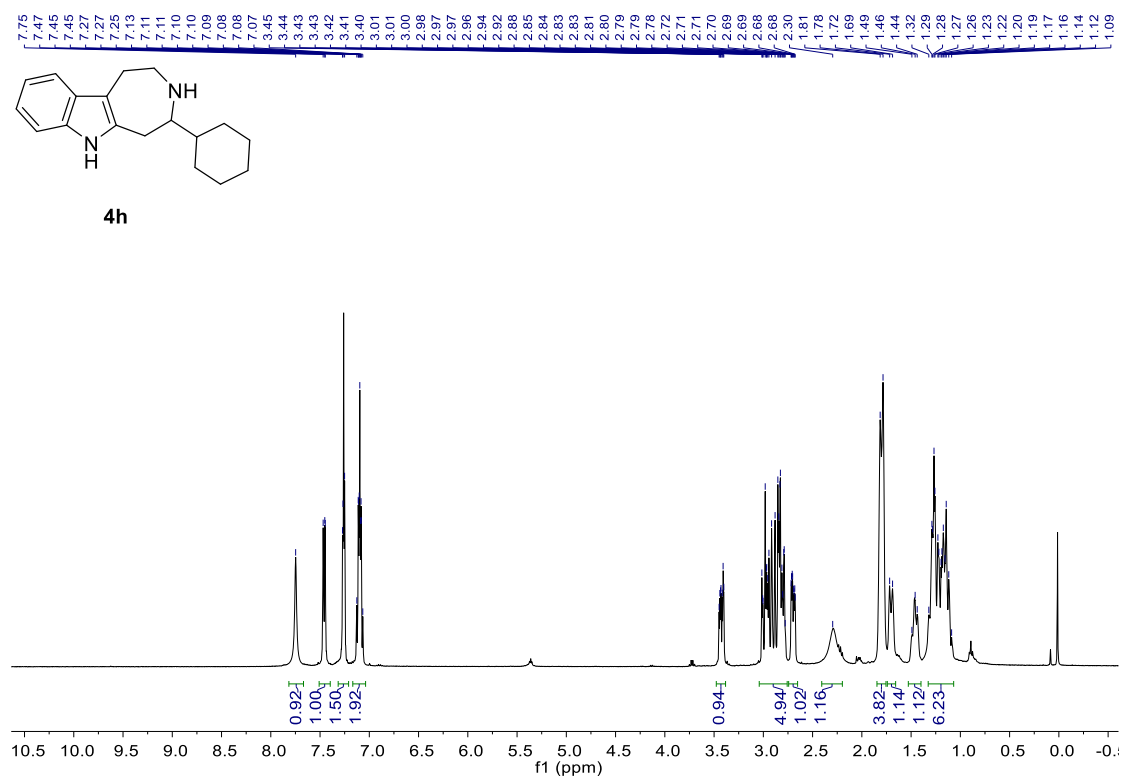

**$^{13}\text{C}$  NMR (100 MHz,  $\text{CDCl}_3$ , compound **4h**)**

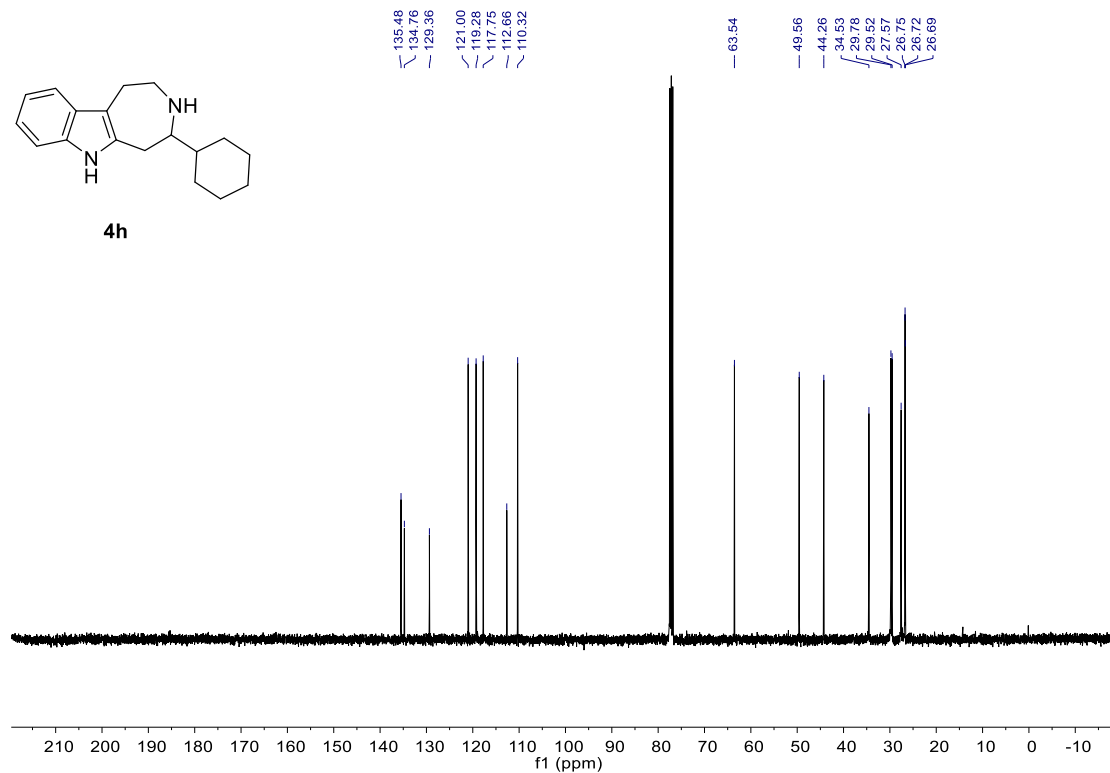

**$^1\text{H}$  NMR (400 MHz,  $\text{CDCl}_3$ , compound **4i**)**

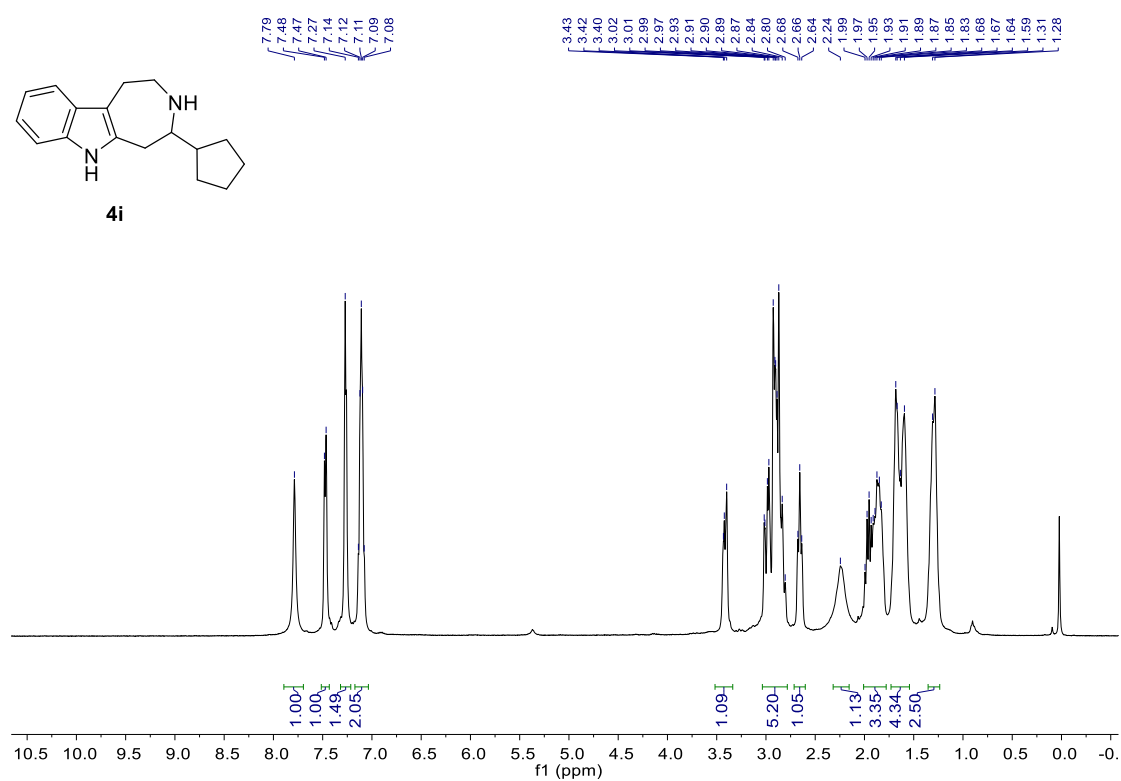

**$^{13}\text{C}$  NMR (100 MHz,  $\text{CDCl}_3$ , compound **4i**)**

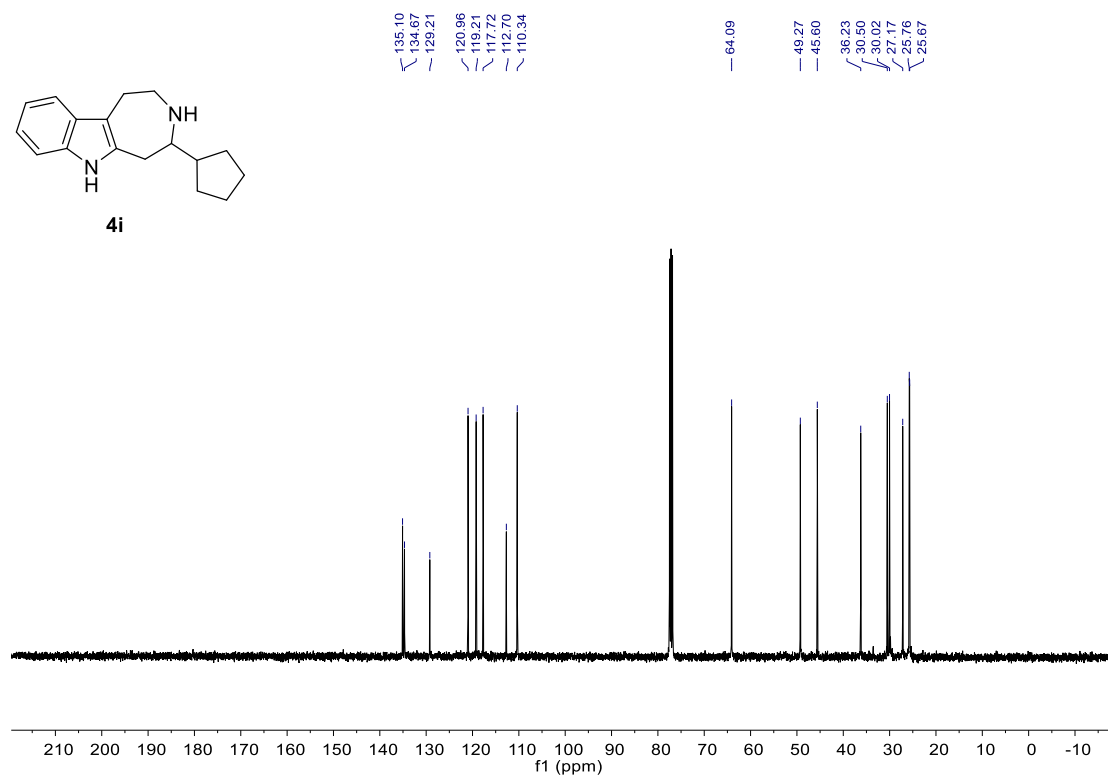

**$^1\text{H}$  NMR (400 MHz,  $\text{CDCl}_3$ , compound **4j**)**

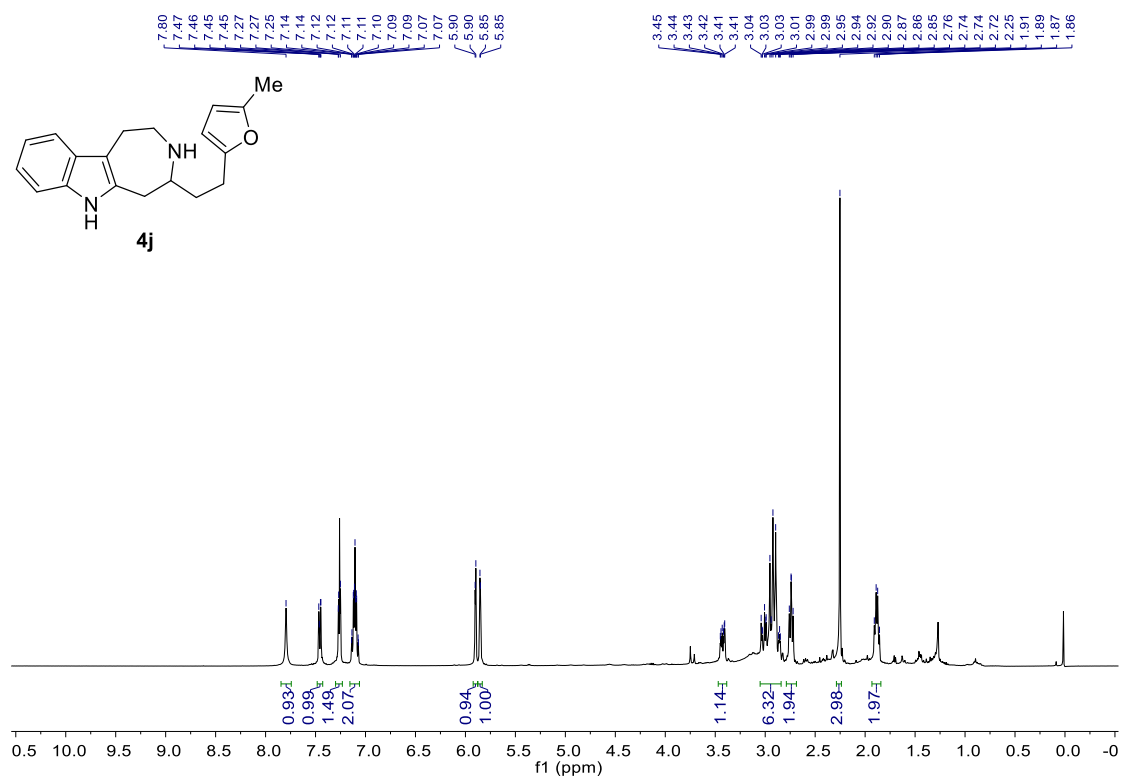

**$^{13}\text{C}$  NMR (100 MHz,  $\text{CDCl}_3$ , compound **4j**)**

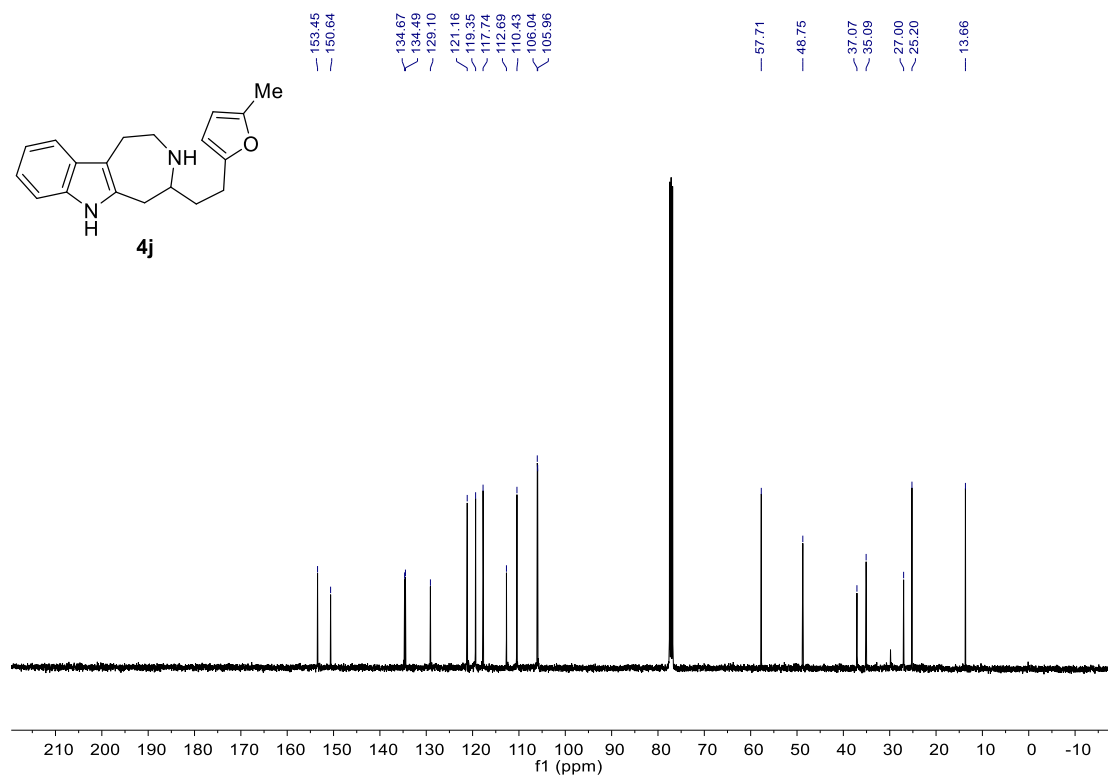

**$^1\text{H}$  NMR (400 MHz,  $\text{CDCl}_3$ , compound **4k**, isomer 1)**

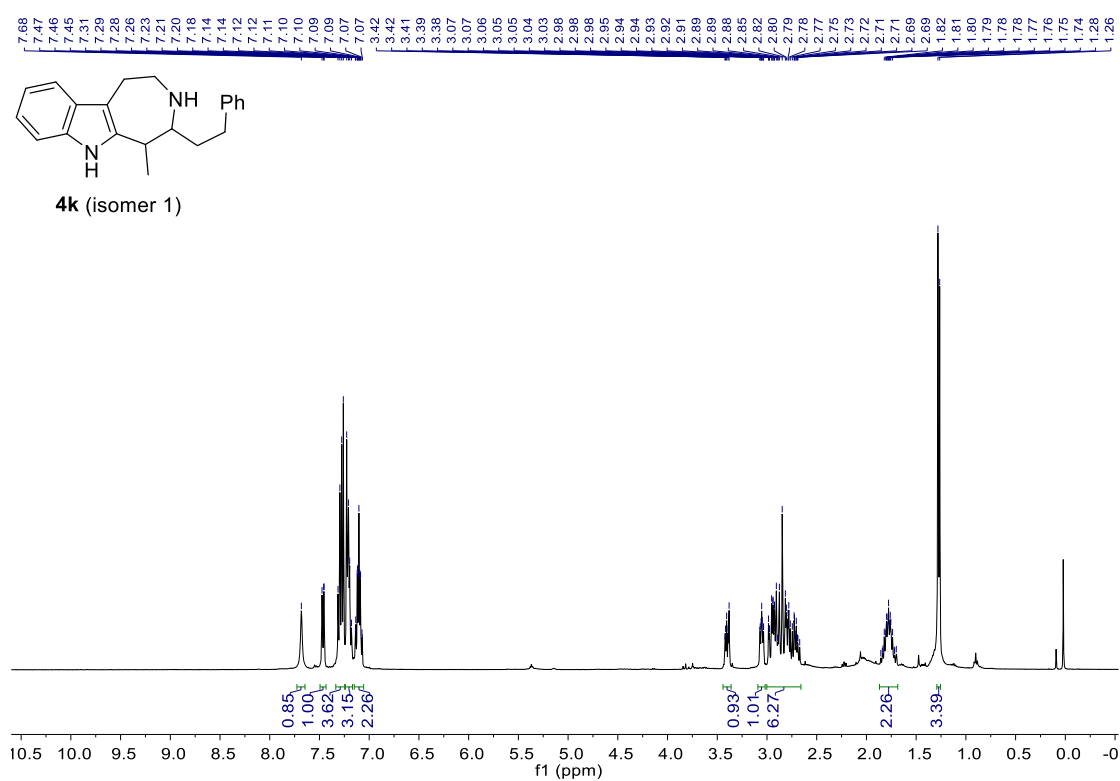

**$^{13}\text{C}$  NMR (100 MHz,  $\text{CDCl}_3$ , compound **4k**, isomer 1)**

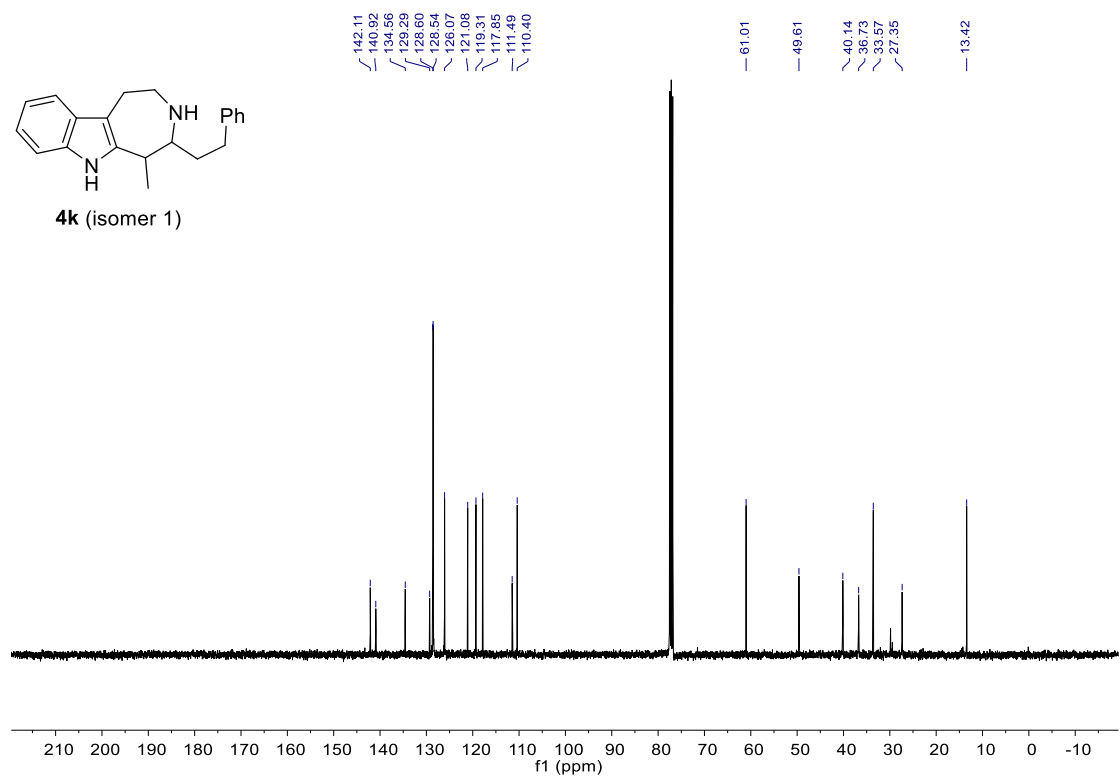

**$^1\text{H}$  NMR (400 MHz,  $\text{CDCl}_3$ , compound **4k**, isomer 2)**

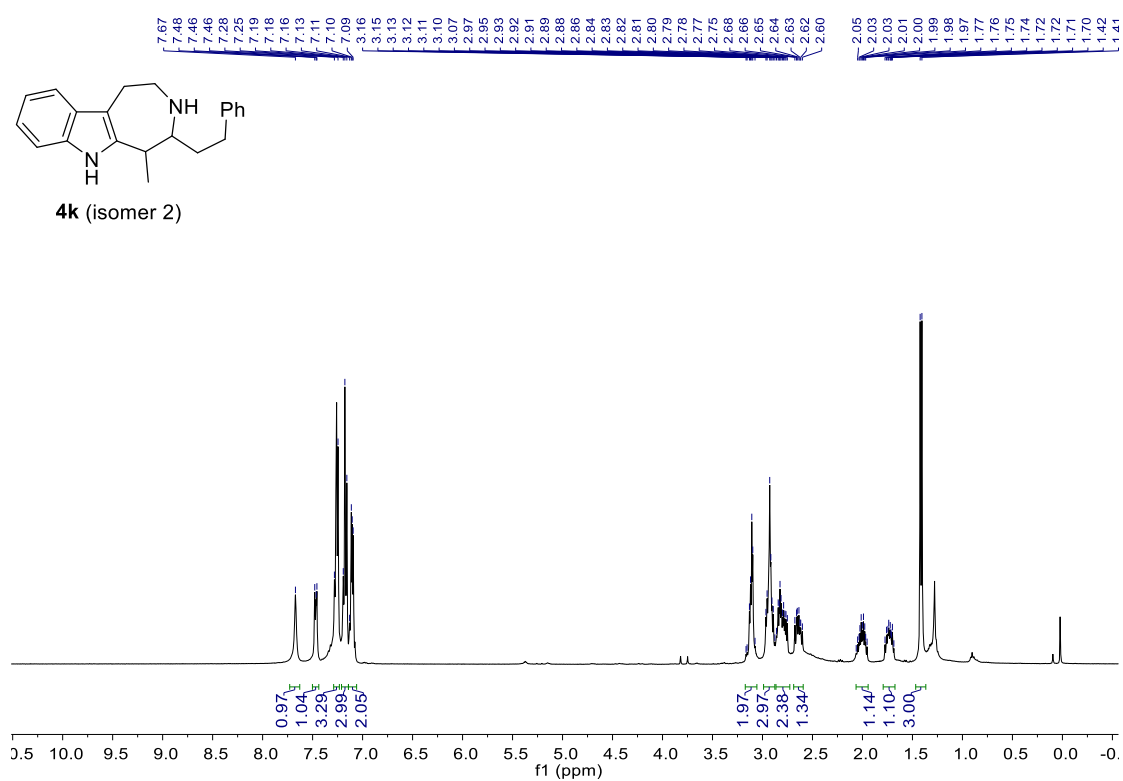

**$^{13}\text{C}$  NMR (100 MHz,  $\text{CDCl}_3$ , compound **4k**, isomer 2)**

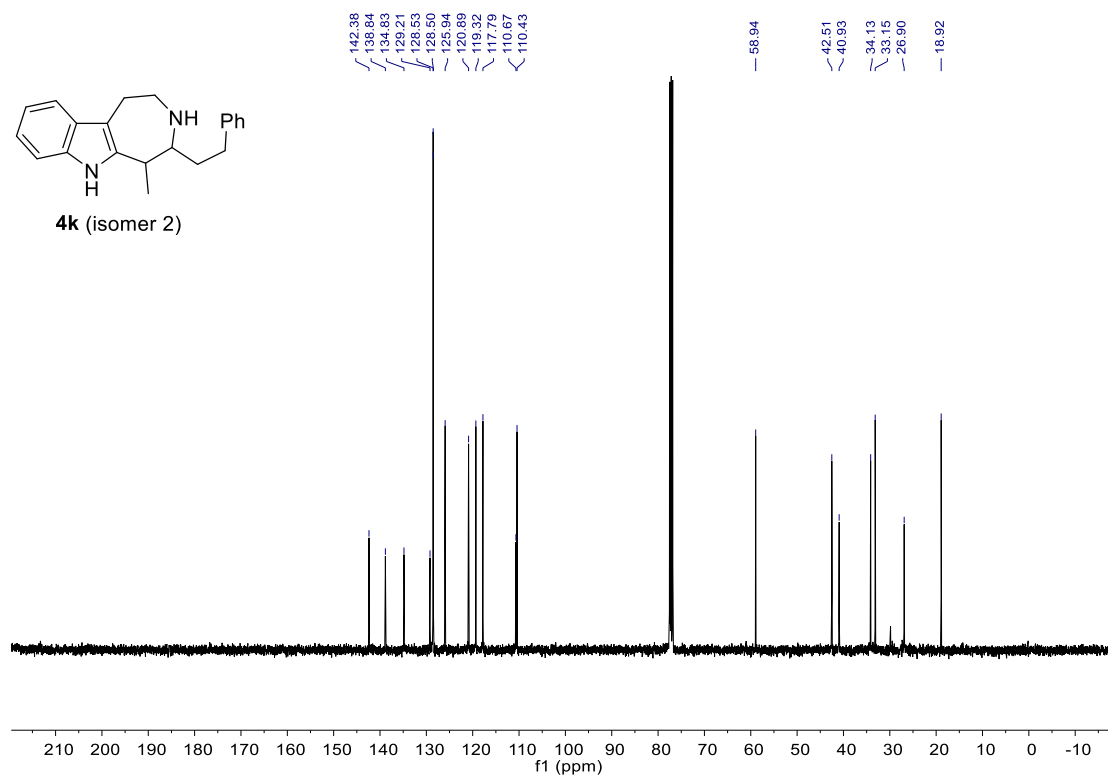

**$^1\text{H}$  NMR (400 MHz,  $\text{CDCl}_3$ , compound **4I**)**

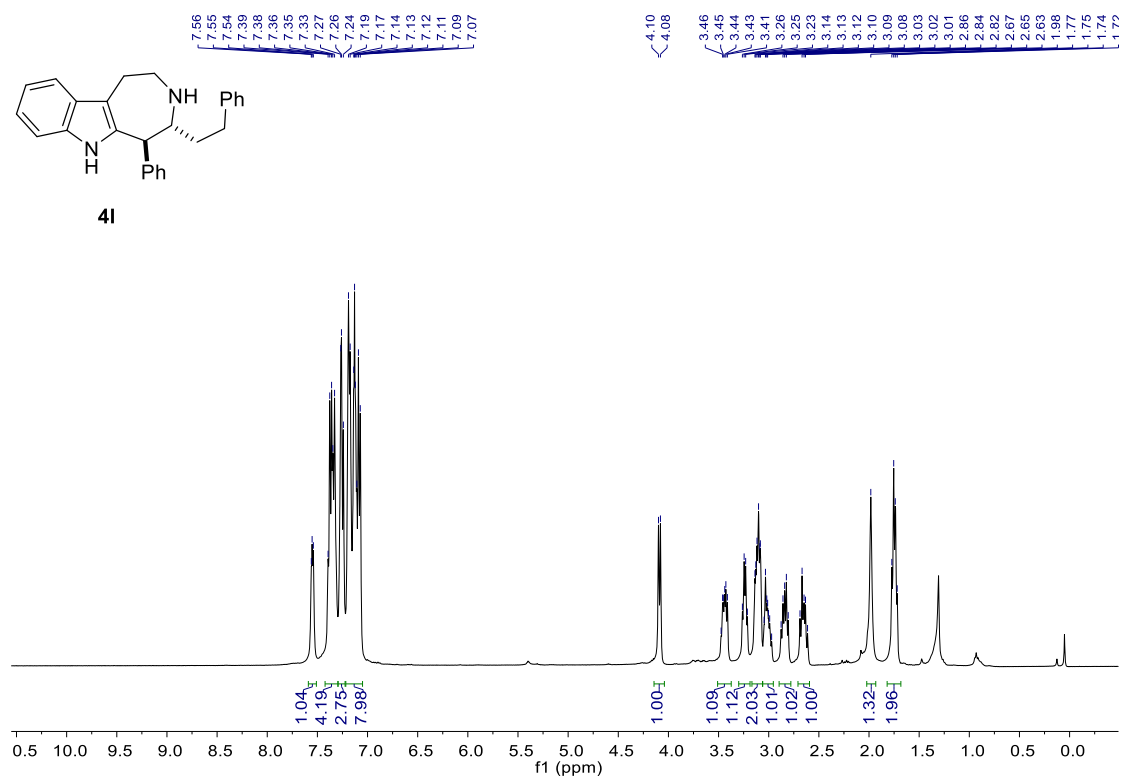

**$^{13}\text{C}$  NMR (100 MHz,  $\text{CDCl}_3$ , compound **4I**)**

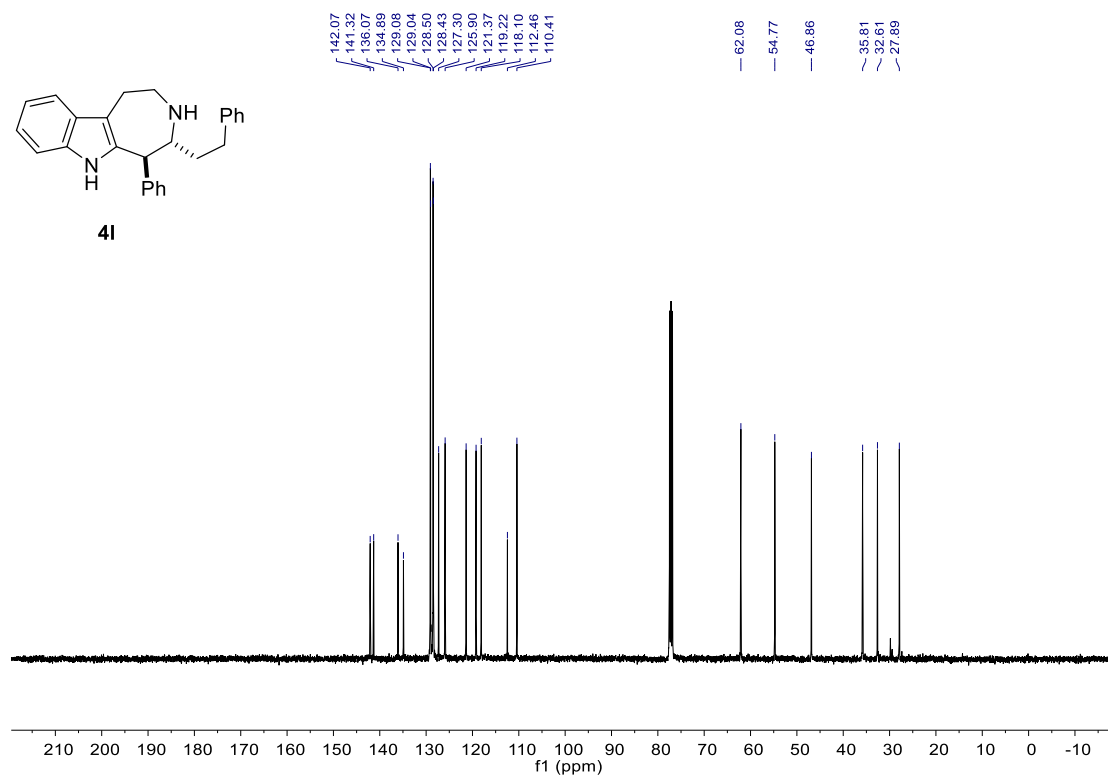

**$^1\text{H}$  NMR (400 MHz,  $\text{CDCl}_3$ , compound **4m**)**

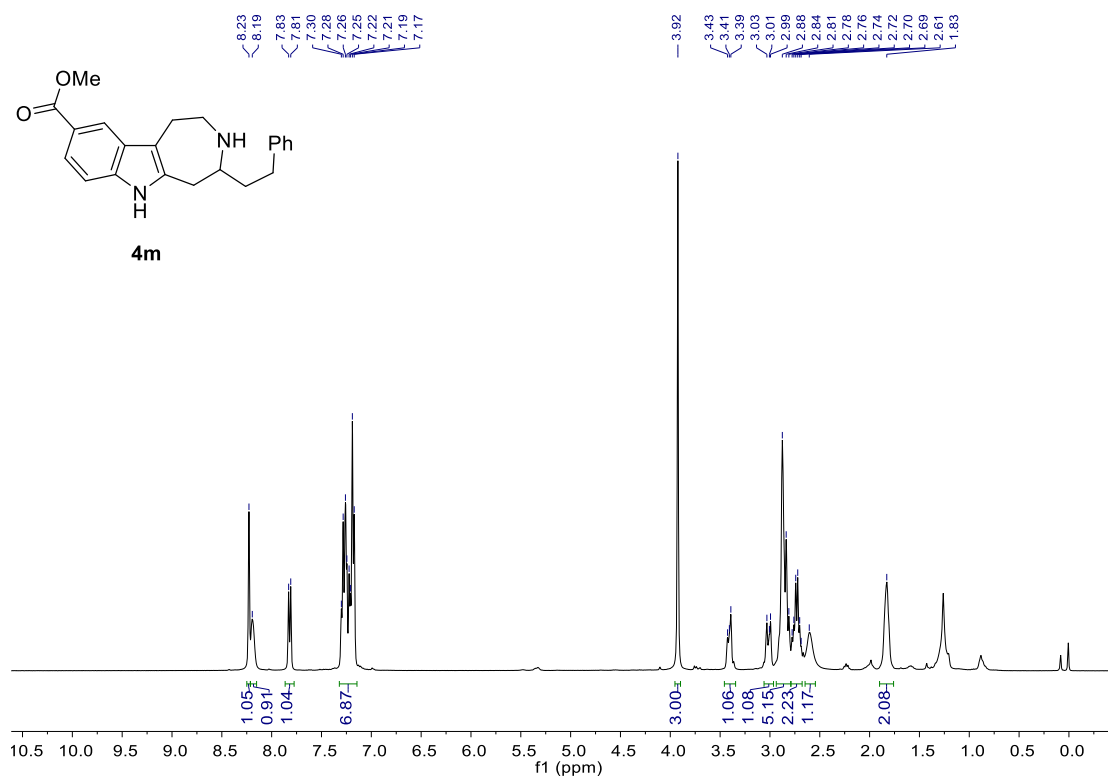

**$^{13}\text{C}$  NMR (100 MHz,  $\text{CDCl}_3$ , compound **4m**)**

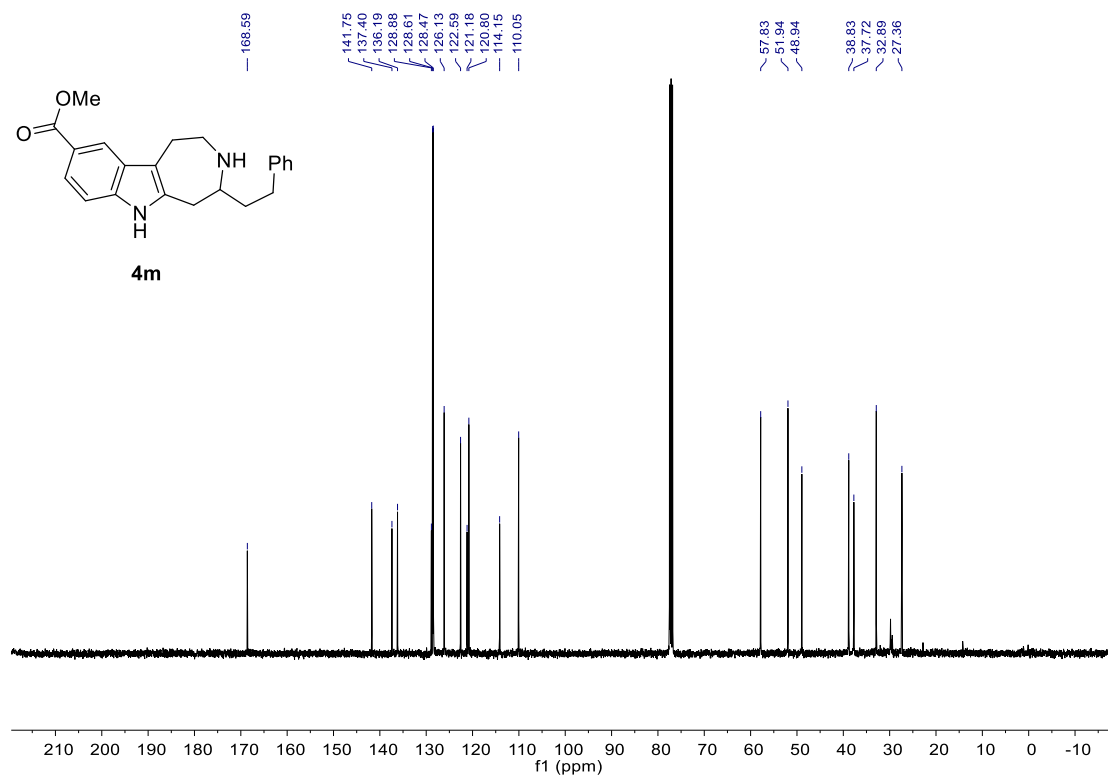

**$^1\text{H}$  NMR (400 MHz,  $\text{CDCl}_3$ , compound **4n**)**

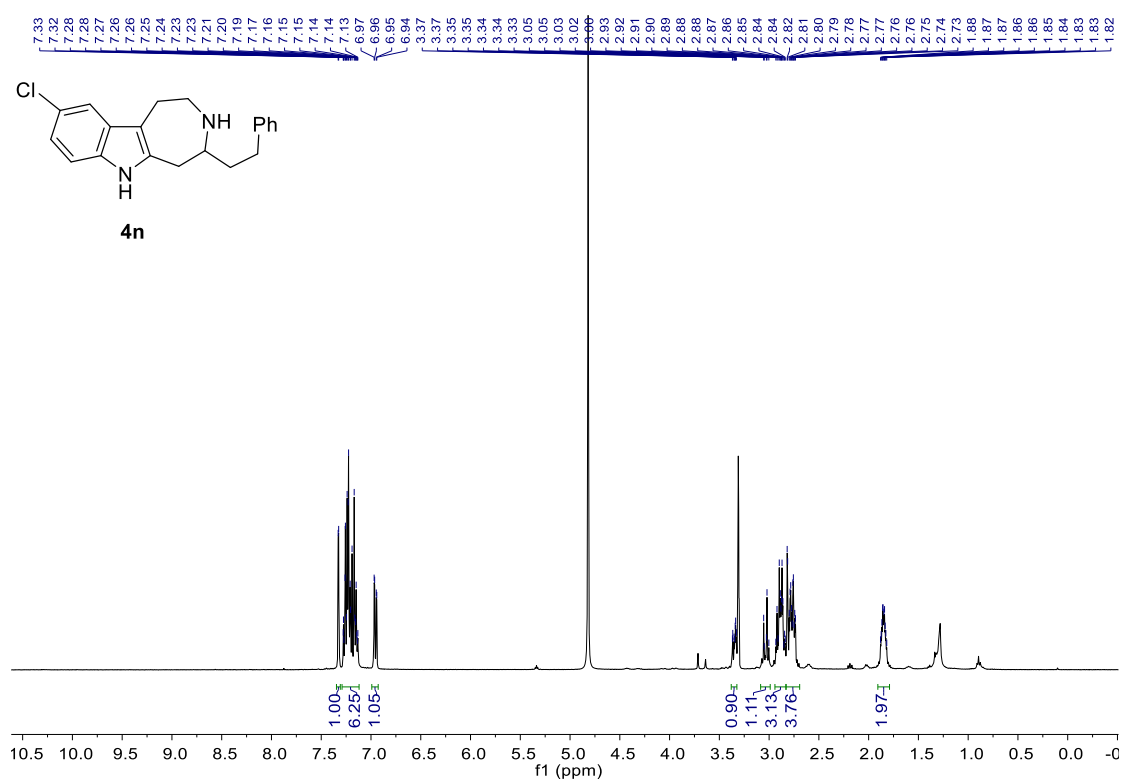

**$^{13}\text{C}$  NMR (100 MHz,  $\text{CDCl}_3$ , compound **4n**)**

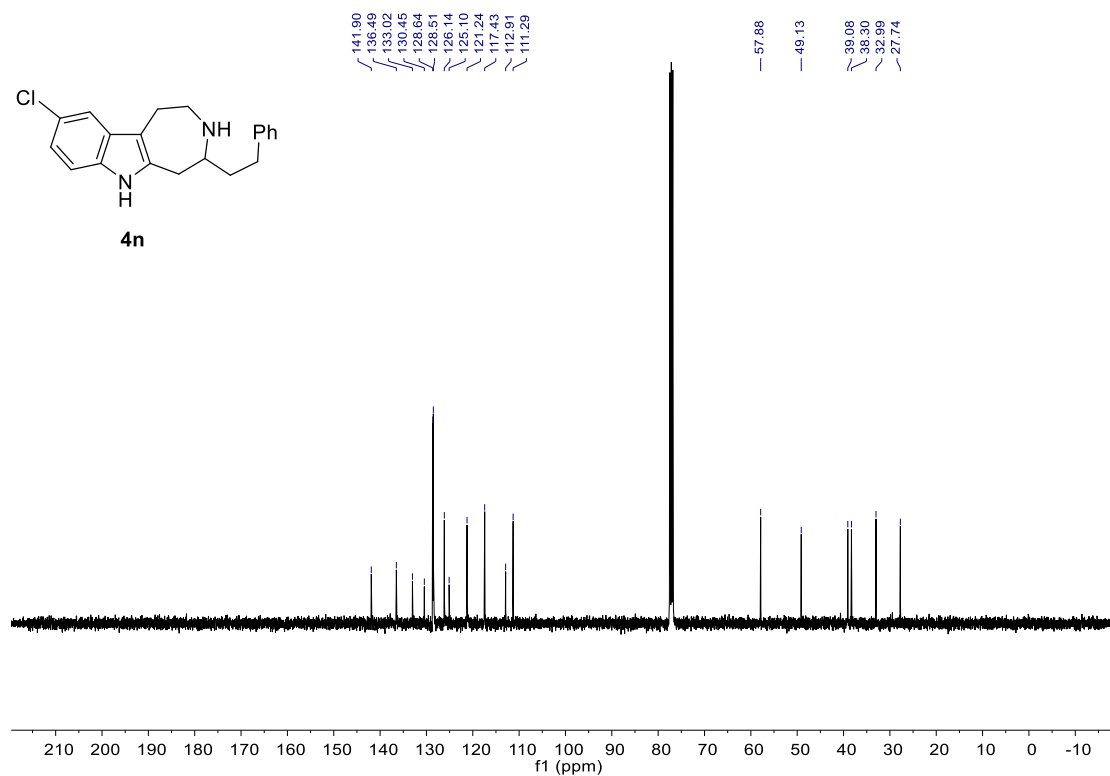

**<sup>1</sup>H NMR (400 MHz, CDCl<sub>3</sub>, compound 4o)**

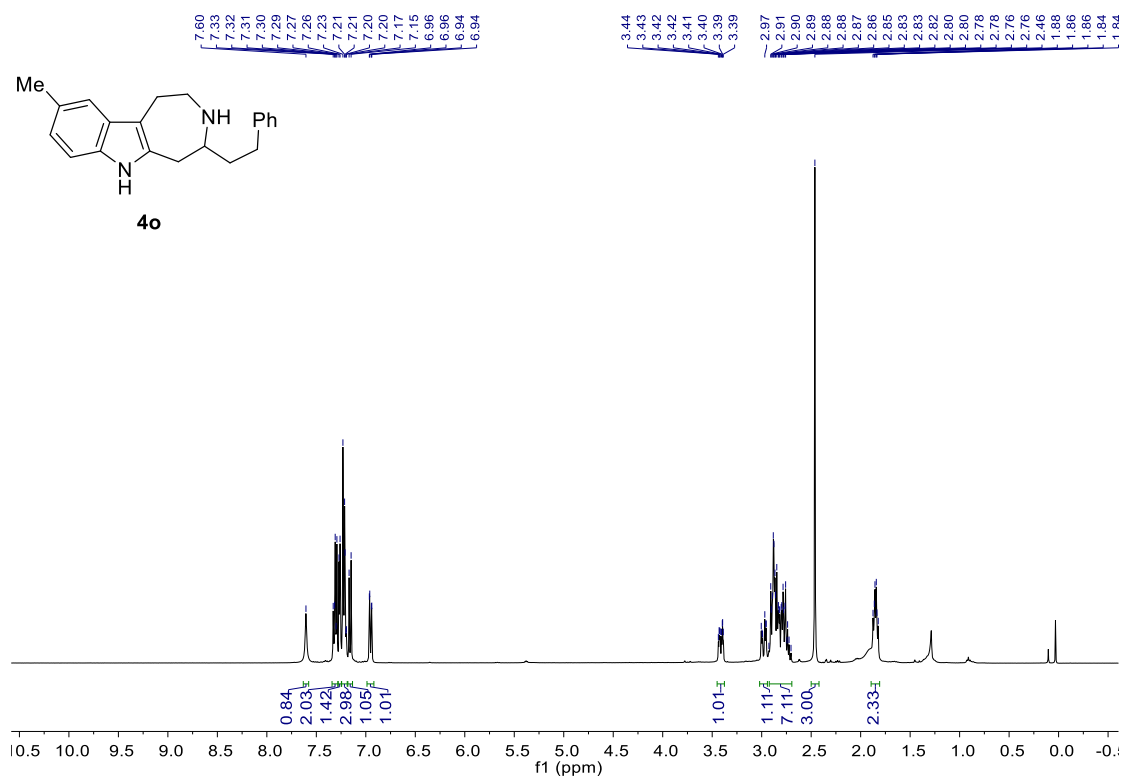

**<sup>13</sup>C NMR (100 MHz, CDCl<sub>3</sub>, compound 4o)**

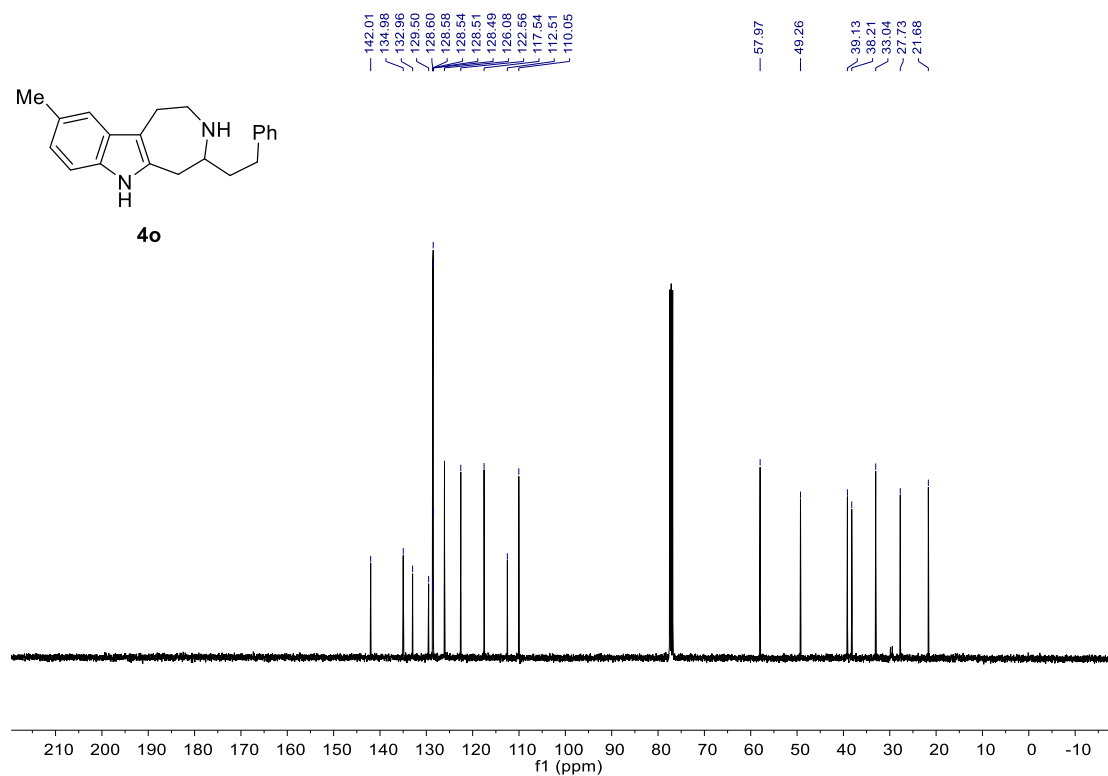

**$^1\text{H}$  NMR (400 MHz,  $\text{CDCl}_3$ , compound **4p**)**

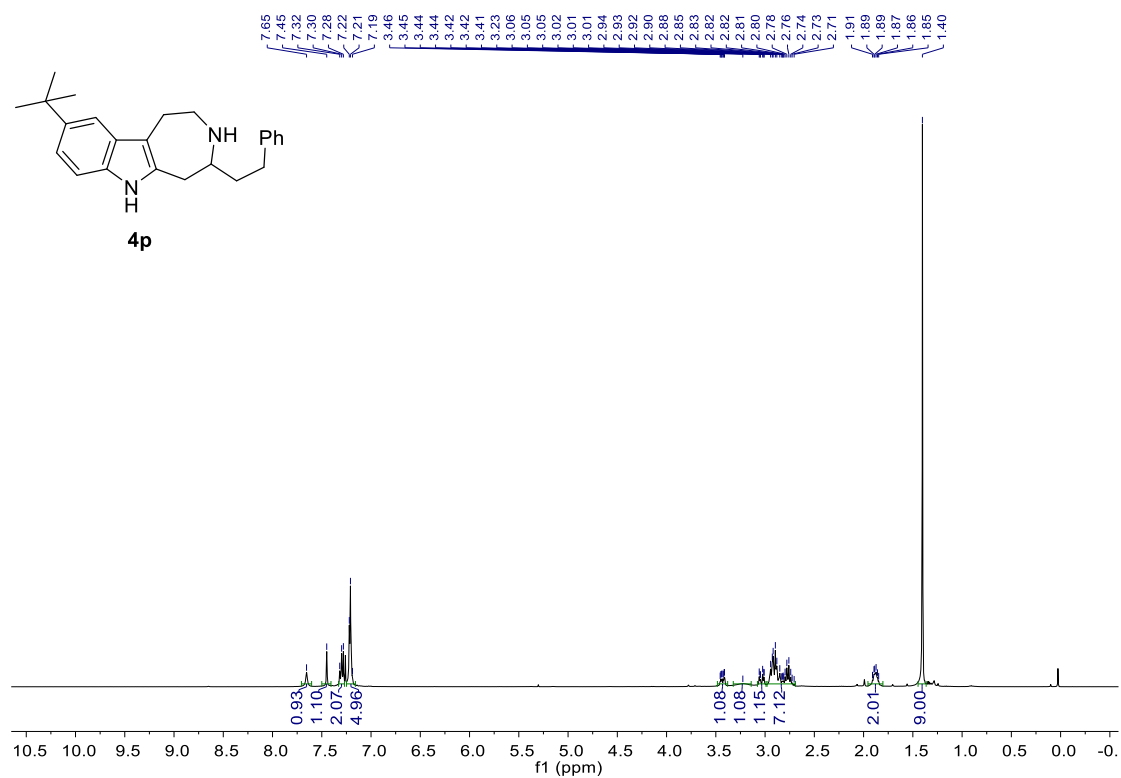

**$^{13}\text{C}$  NMR (100 MHz,  $\text{CDCl}_3$ , compound **4p**)**

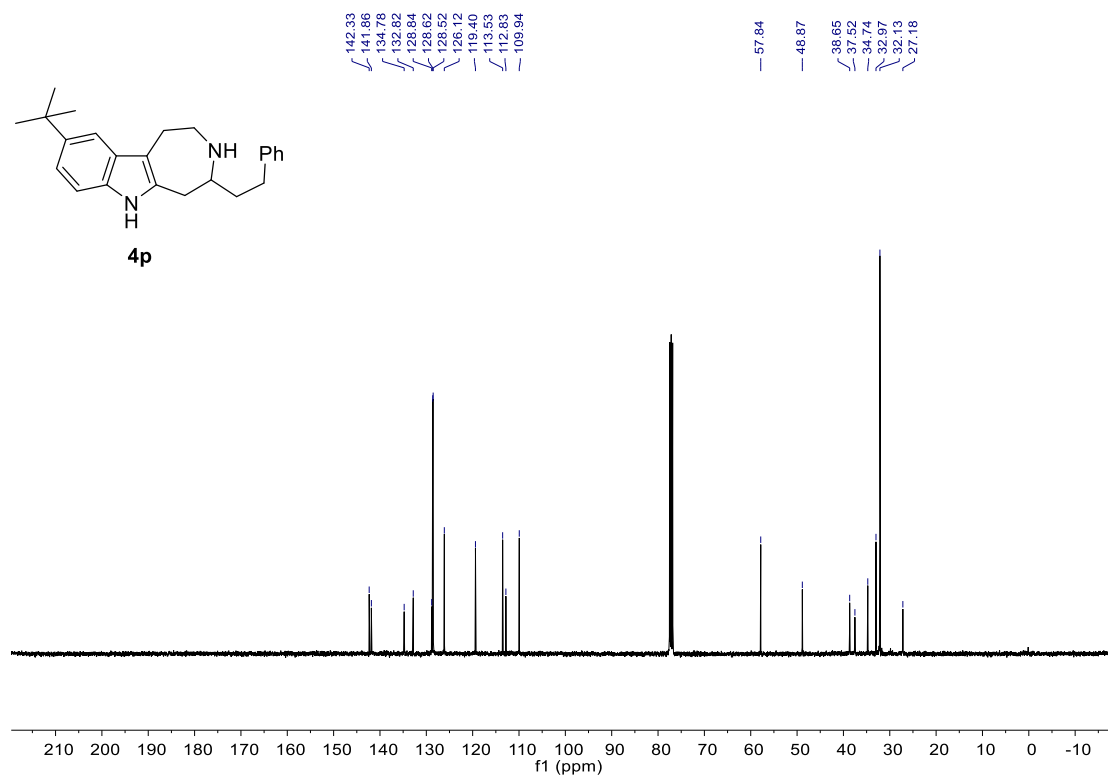

**$^1\text{H}$  NMR (400 MHz,  $\text{CDCl}_3$ , compound **4q**)**

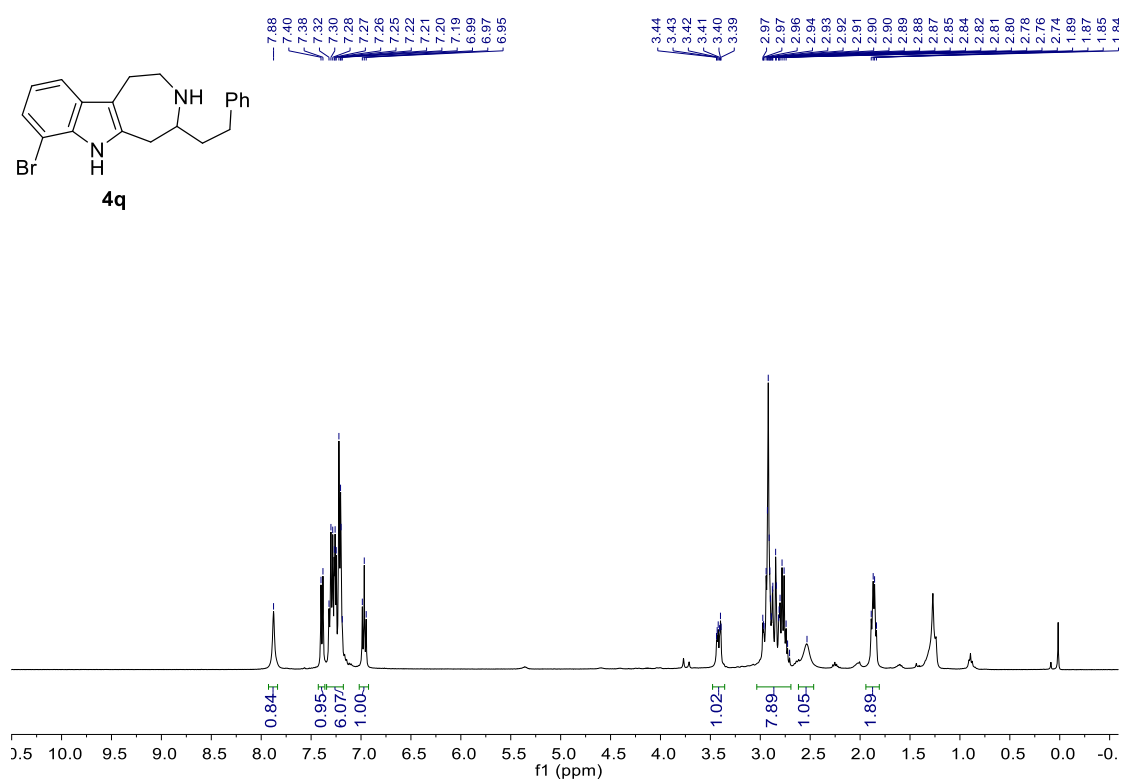

**$^{13}\text{C}$  NMR (100 MHz,  $\text{CDCl}_3$ , compound **4q**)**

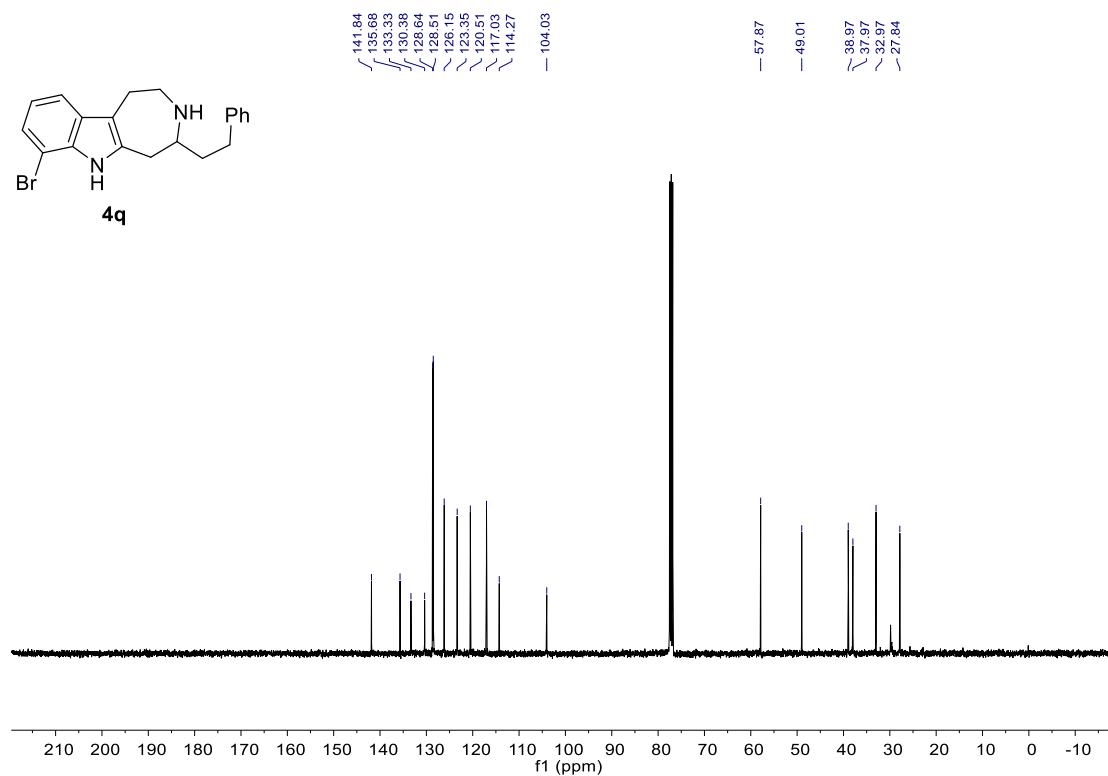

**$^1\text{H}$  NMR (400 MHz,  $\text{CDCl}_3$ , compound **4r**)**

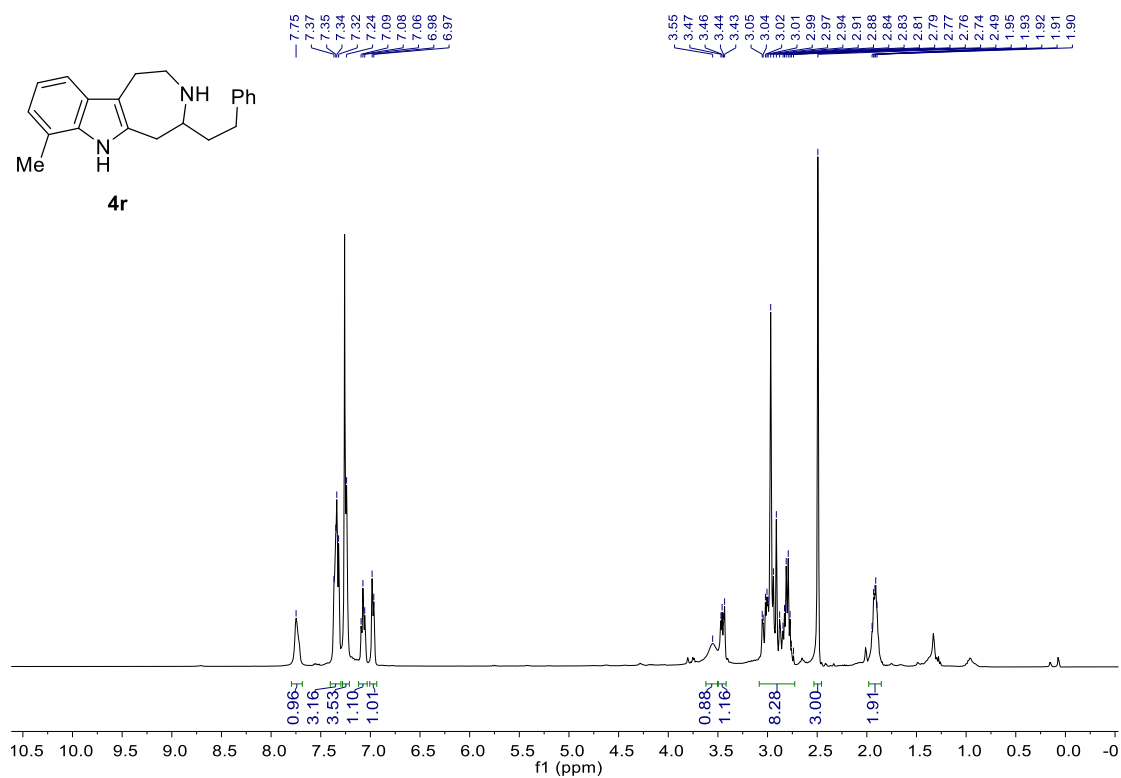

**$^{13}\text{C}$  NMR (100 MHz,  $\text{CDCl}_3$ , compound **4r**)**

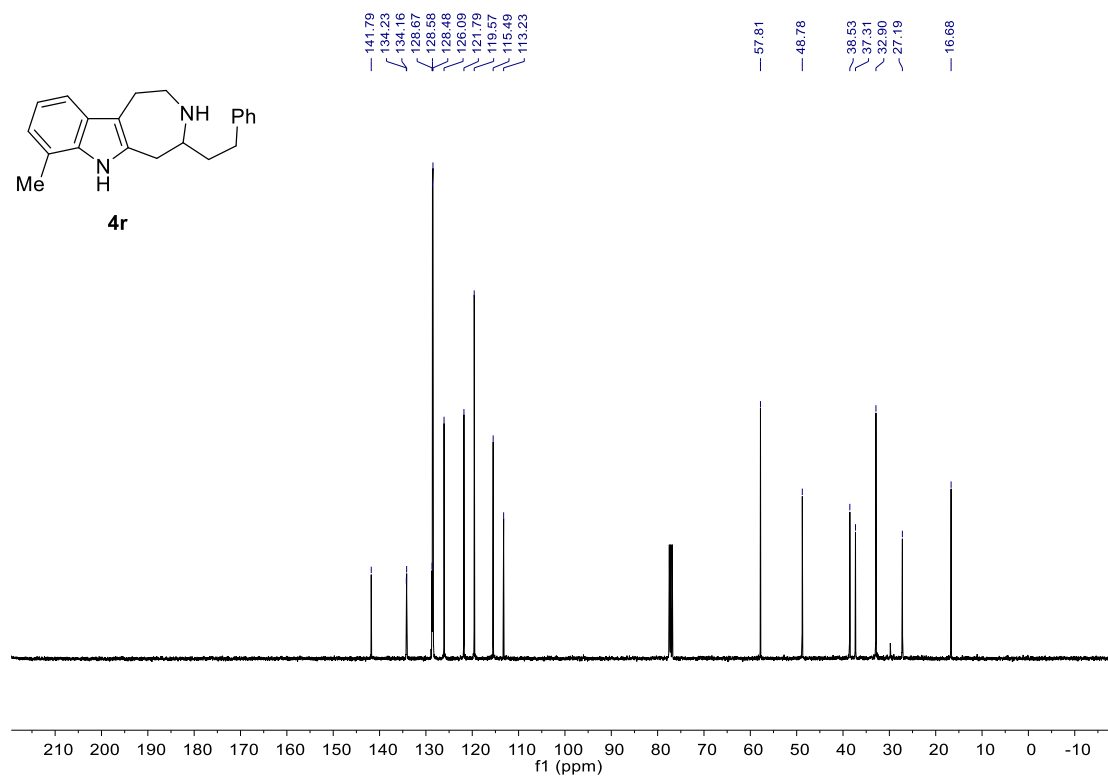

**$^1\text{H}$  NMR (400 MHz,  $\text{CDCl}_3$ , compound **4s**)**

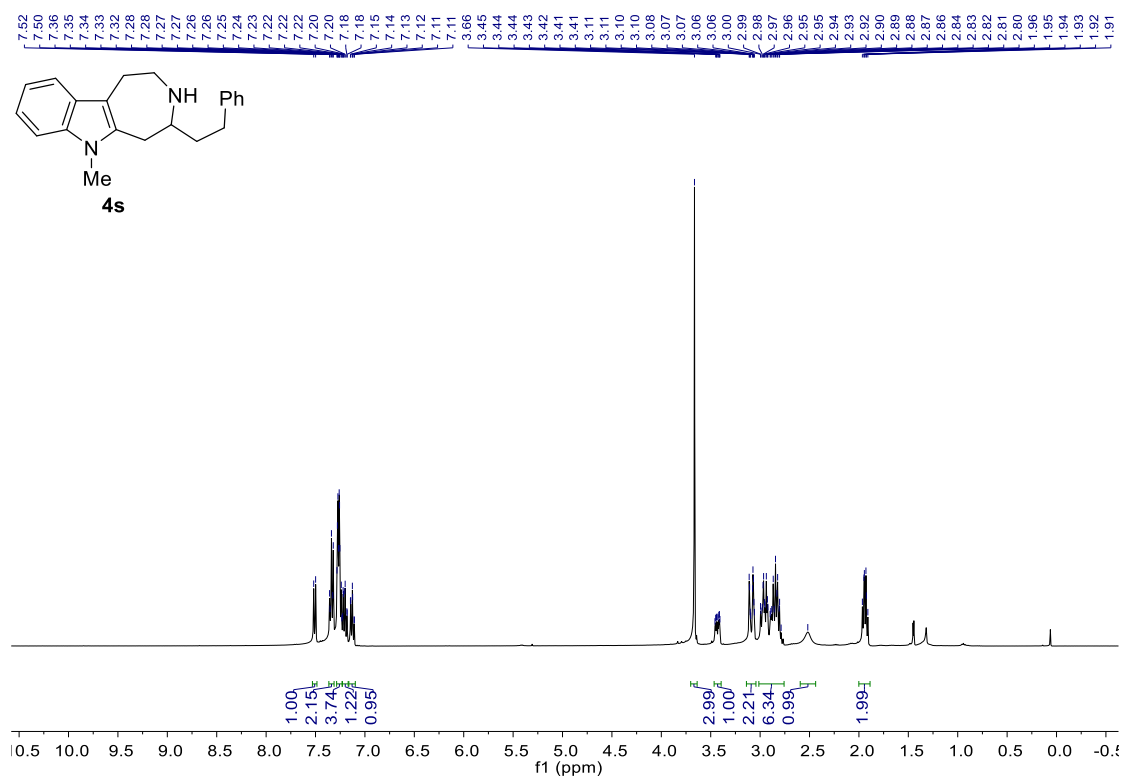

**$^{13}\text{C}$  NMR (100 MHz,  $\text{CDCl}_3$ , compound **4s**)**

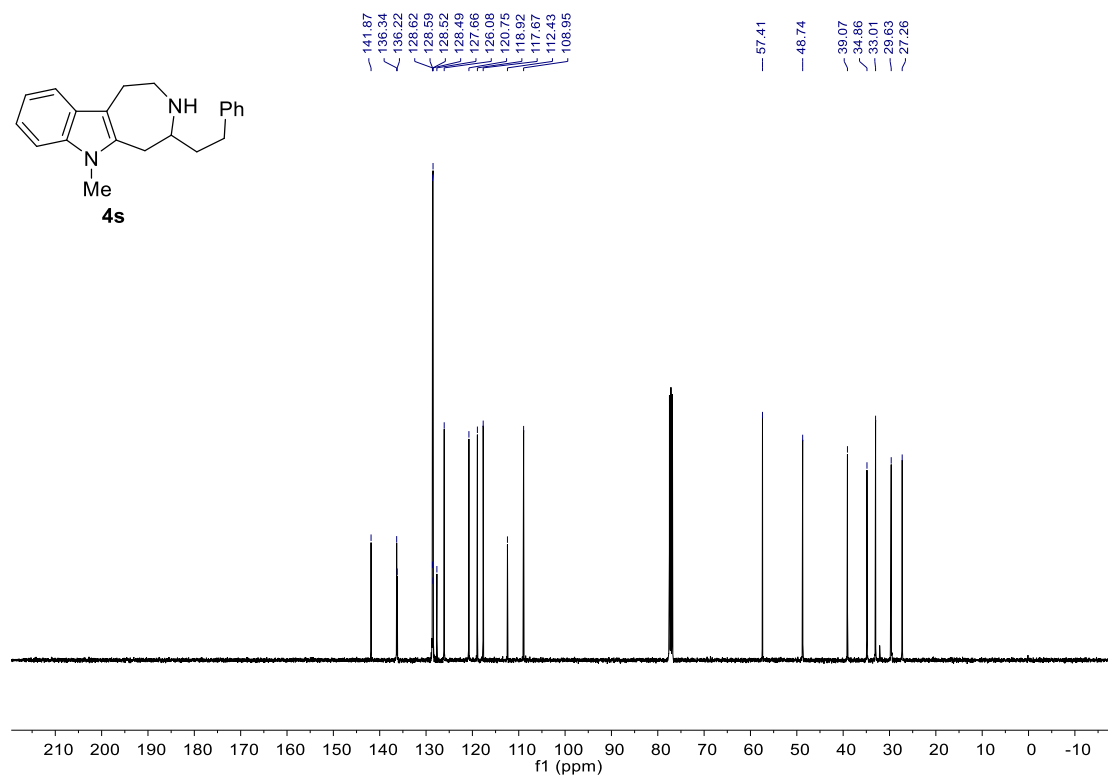

**$^1\text{H}$  NMR (400 MHz,  $\text{CDCl}_3$ , compound **4t**)**

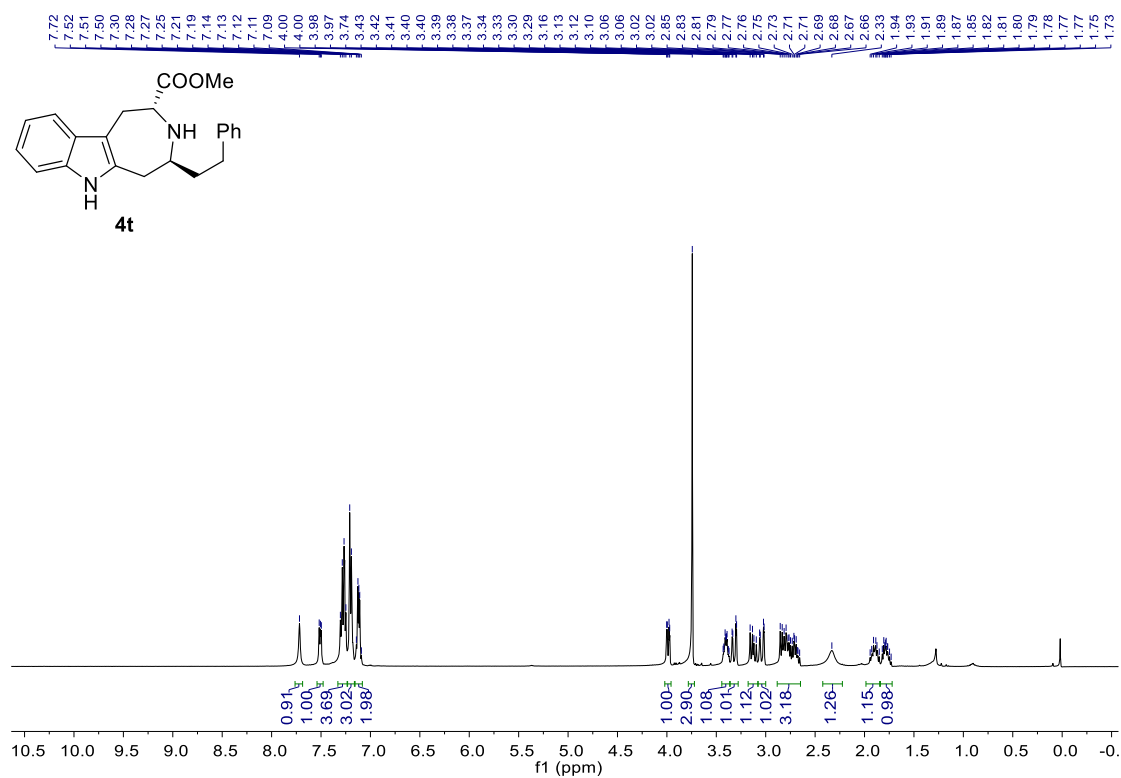

**$^{13}\text{C}$  NMR (100 MHz,  $\text{CDCl}_3$ , compound **4t**)**

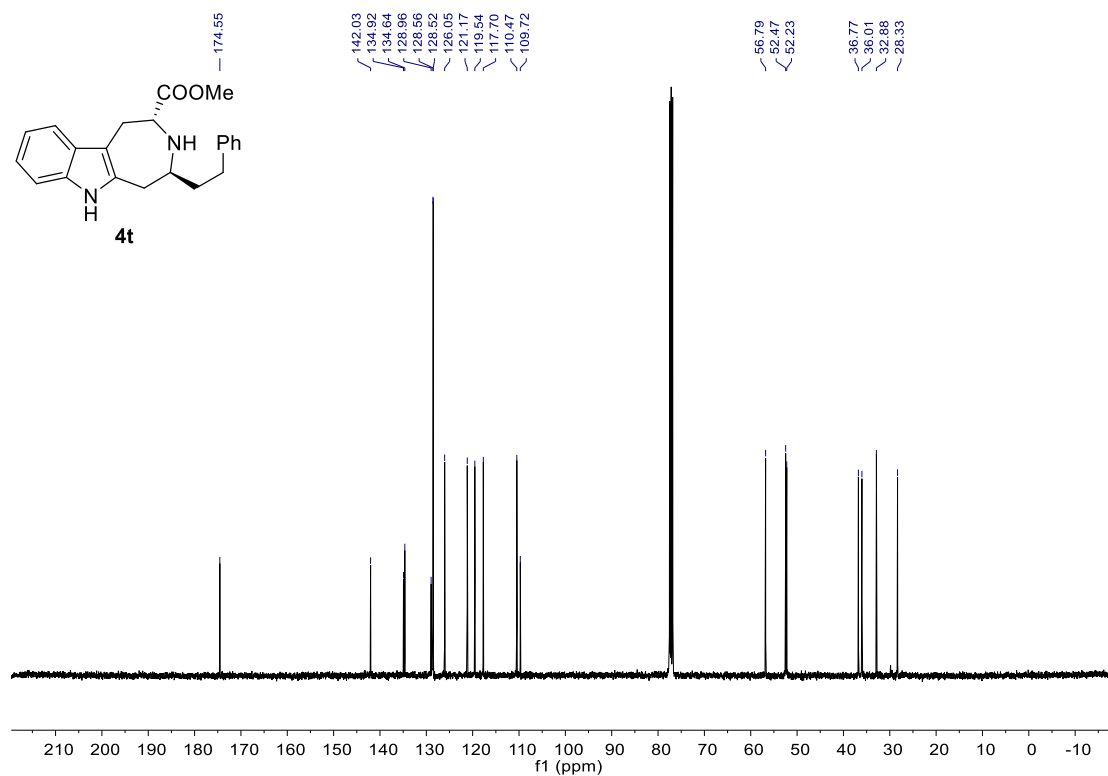

**$^1\text{H}$  NMR (400 MHz,  $\text{CDCl}_3$ , compound **4u**)**

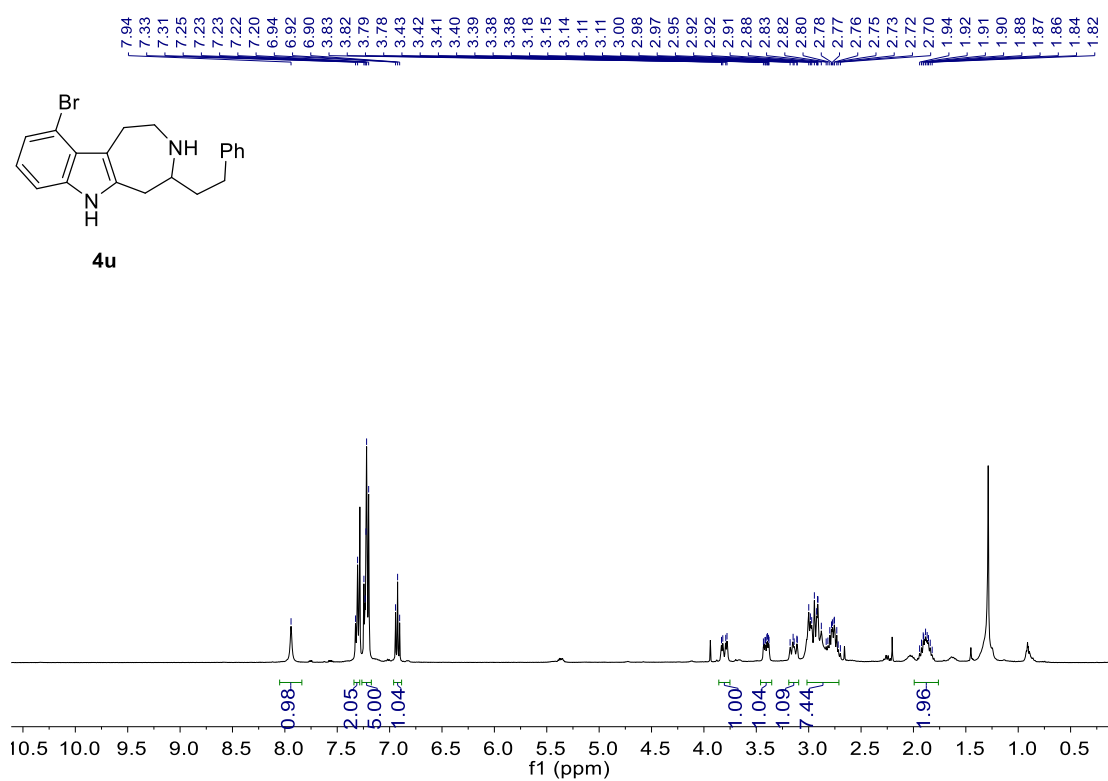

**$^{13}\text{C}$  NMR (100 MHz,  $\text{Methanol-}d_4$ , compound **4u**)**

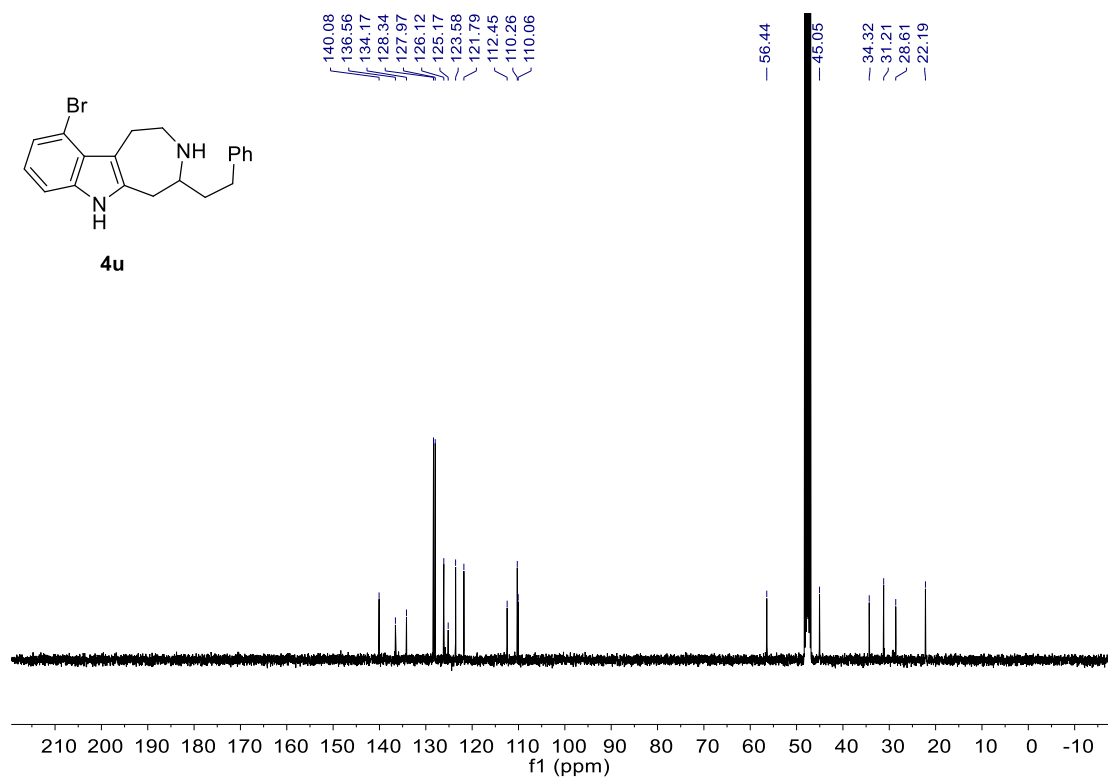

**$^1\text{H}$  NMR (400 MHz,  $\text{CDCl}_3$ , compound **4w**)**

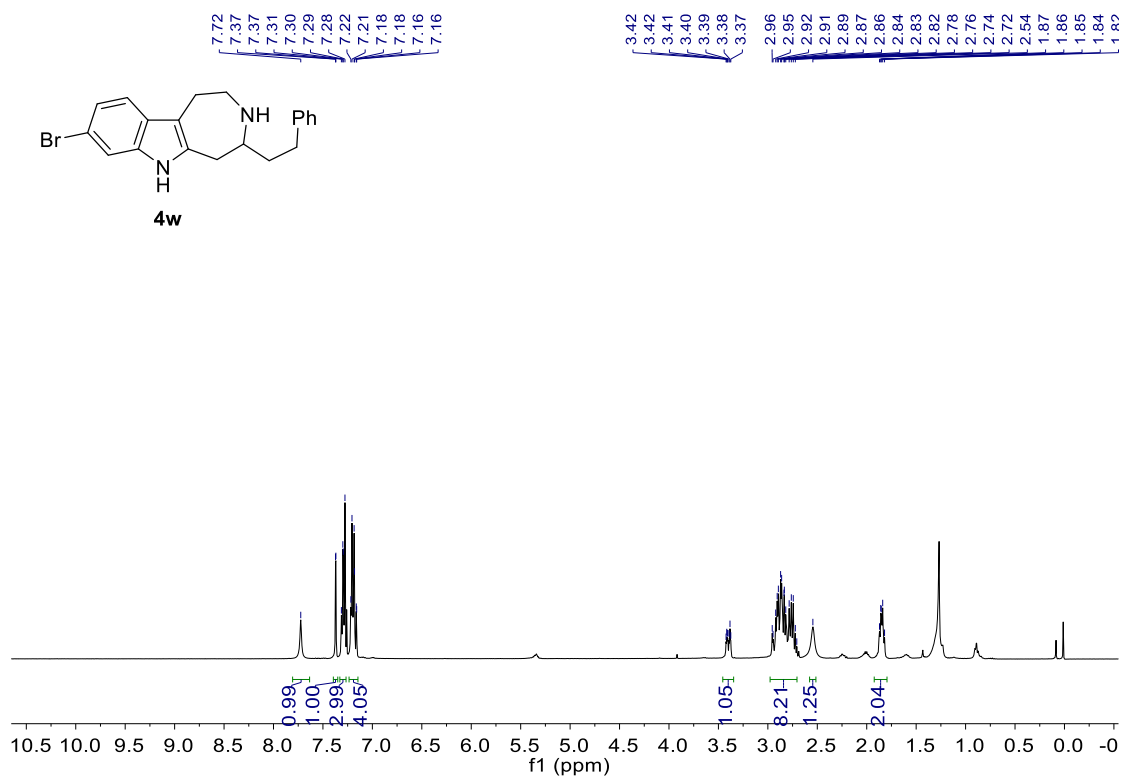

**$^{13}\text{C}$  NMR (100 MHz,  $\text{Methanol-}d_4$ , compound **4w**)**

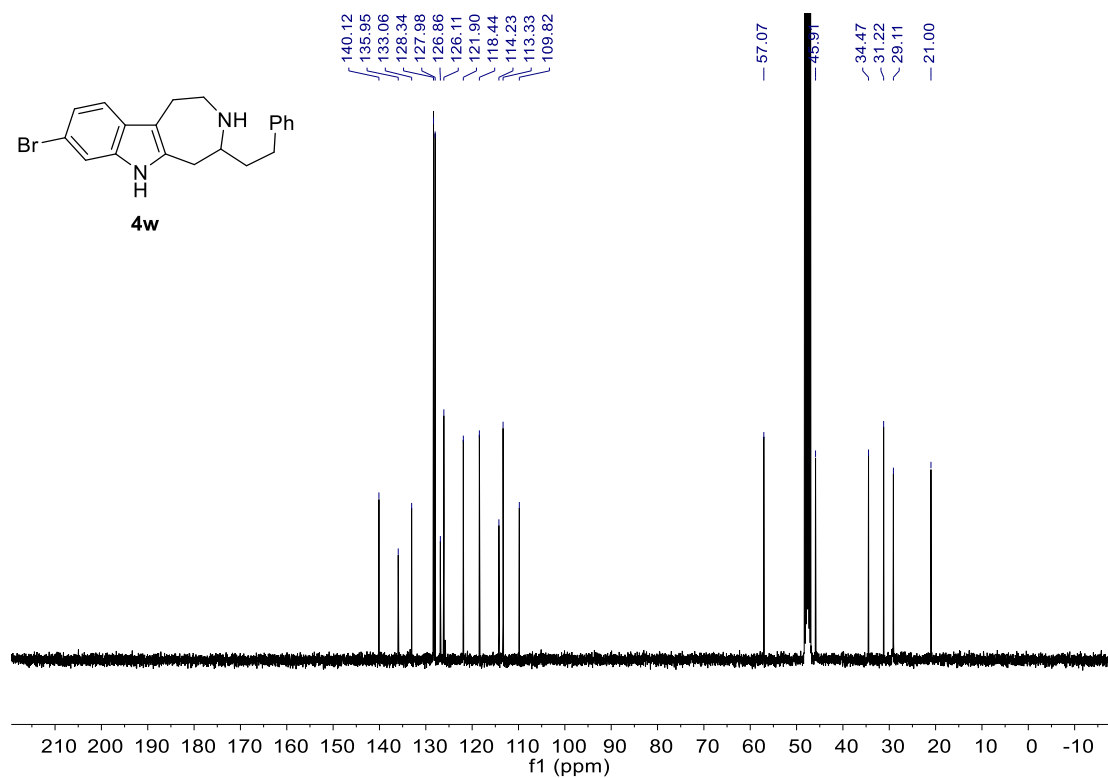

**$^1\text{H}$  NMR (400 MHz,  $\text{CDCl}_3$ , compound **5**)**

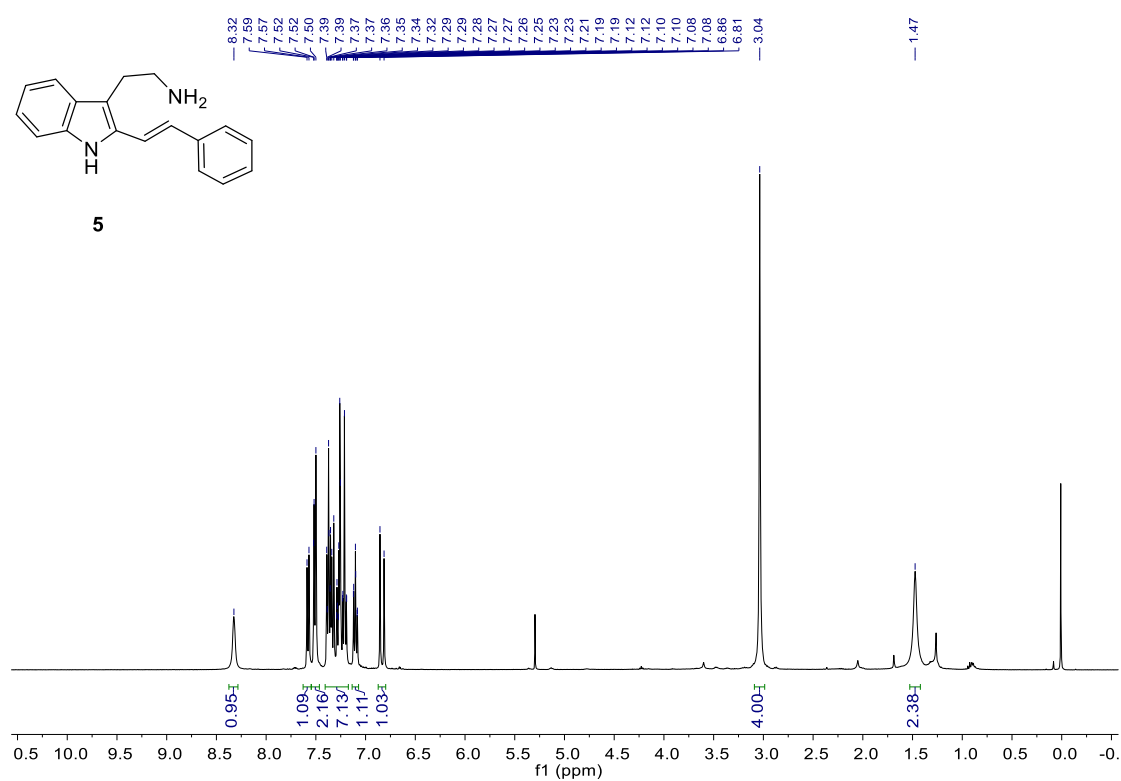

**$^{13}\text{C}$  NMR (100 MHz,  $\text{CDCl}_3$ , compound **5**)**

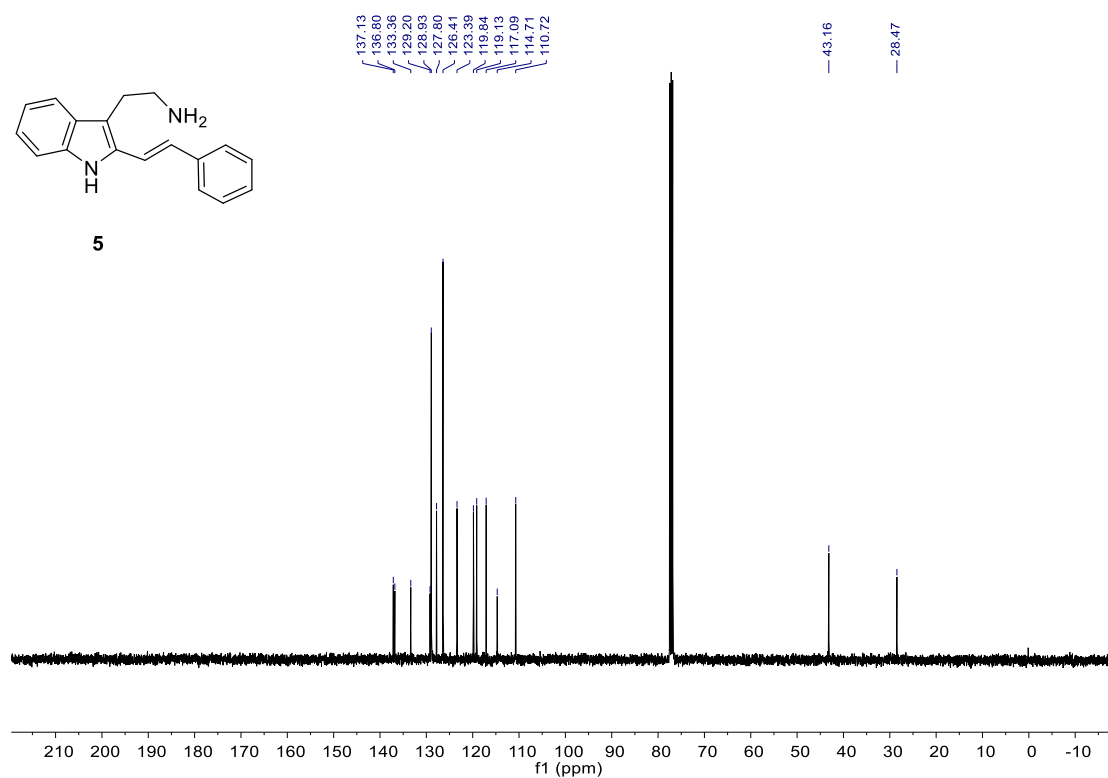

**$^1\text{H}$  NMR (400 MHz,  $\text{CDCl}_3$ , compound **6a**)**

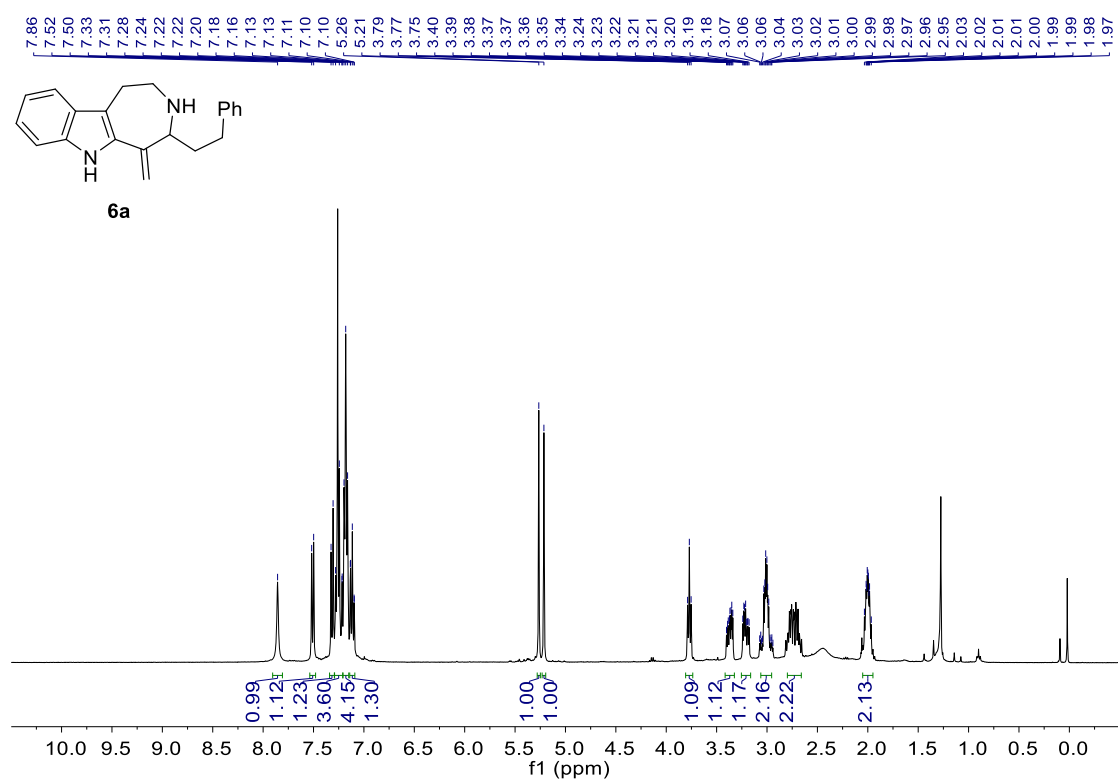

**$^{13}\text{C}$  NMR (100 MHz,  $\text{CDCl}_3$ , compound **6a**)**

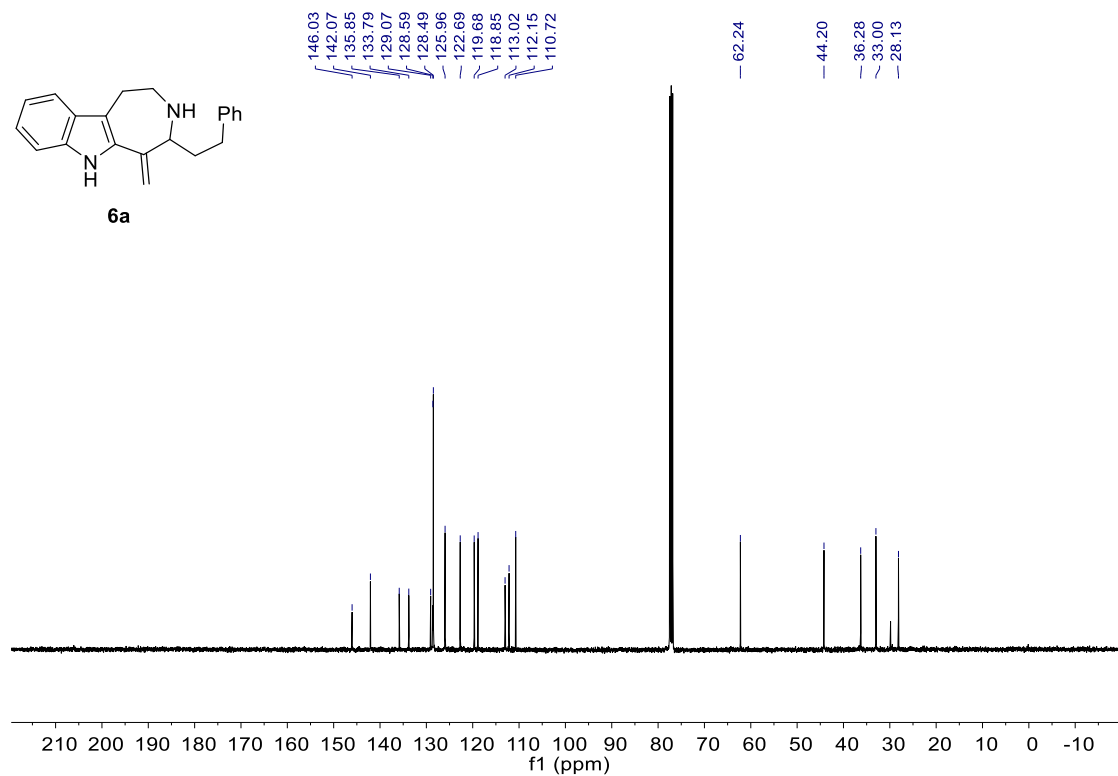

**$^1\text{H}$  NMR (400 MHz,  $\text{CDCl}_3$ , compound Z-6b)**

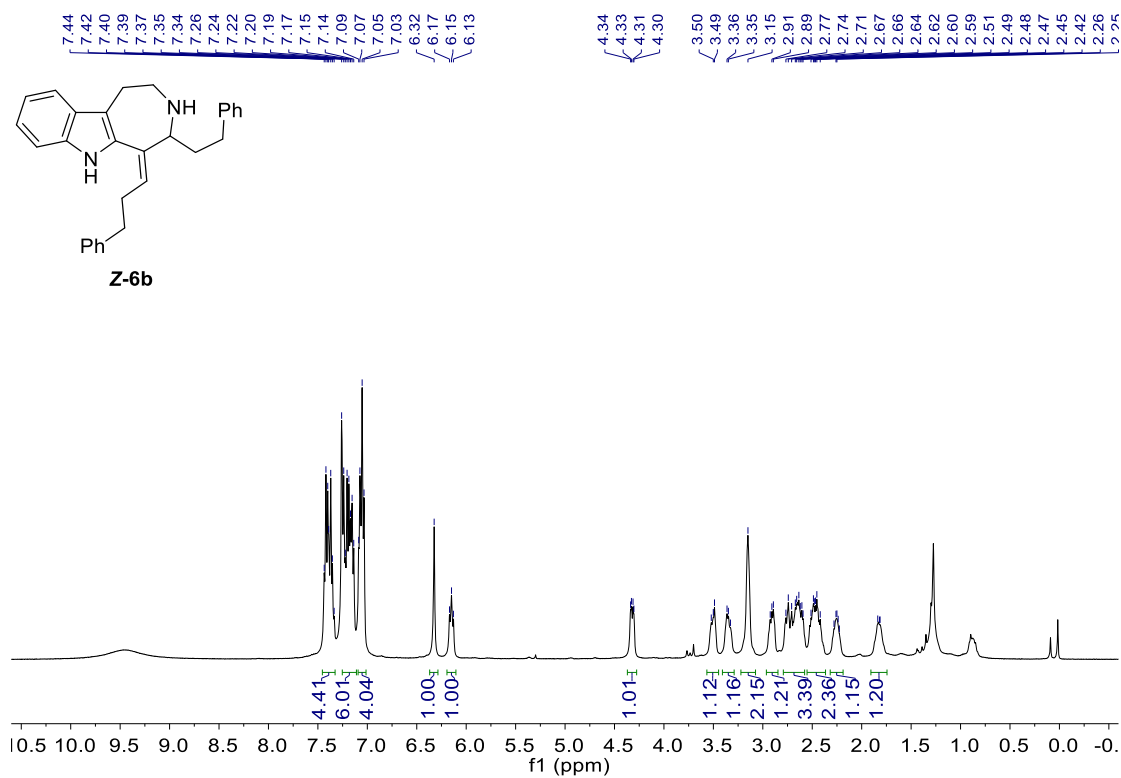

**$^{13}\text{C}$  NMR (100 MHz,  $\text{CDCl}_3$ , compound Z-6b)**

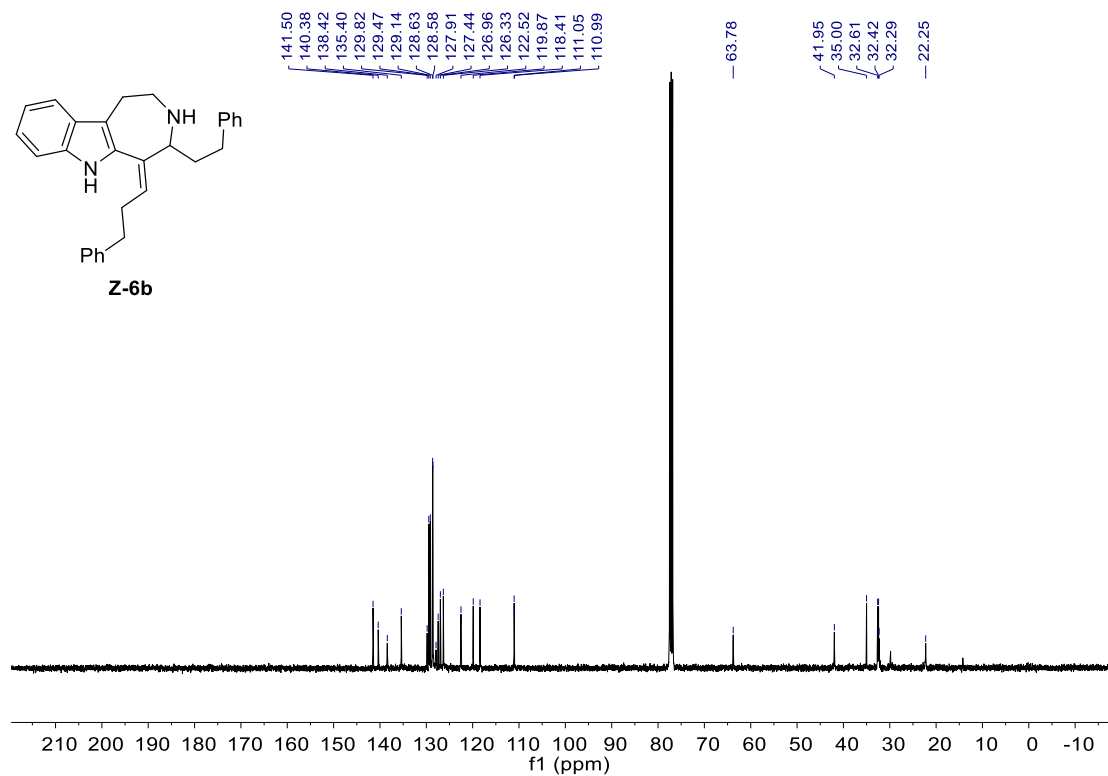

**$^1\text{H}$  NMR (400 MHz,  $\text{CDCl}_3$ , compound *E-6b*)**

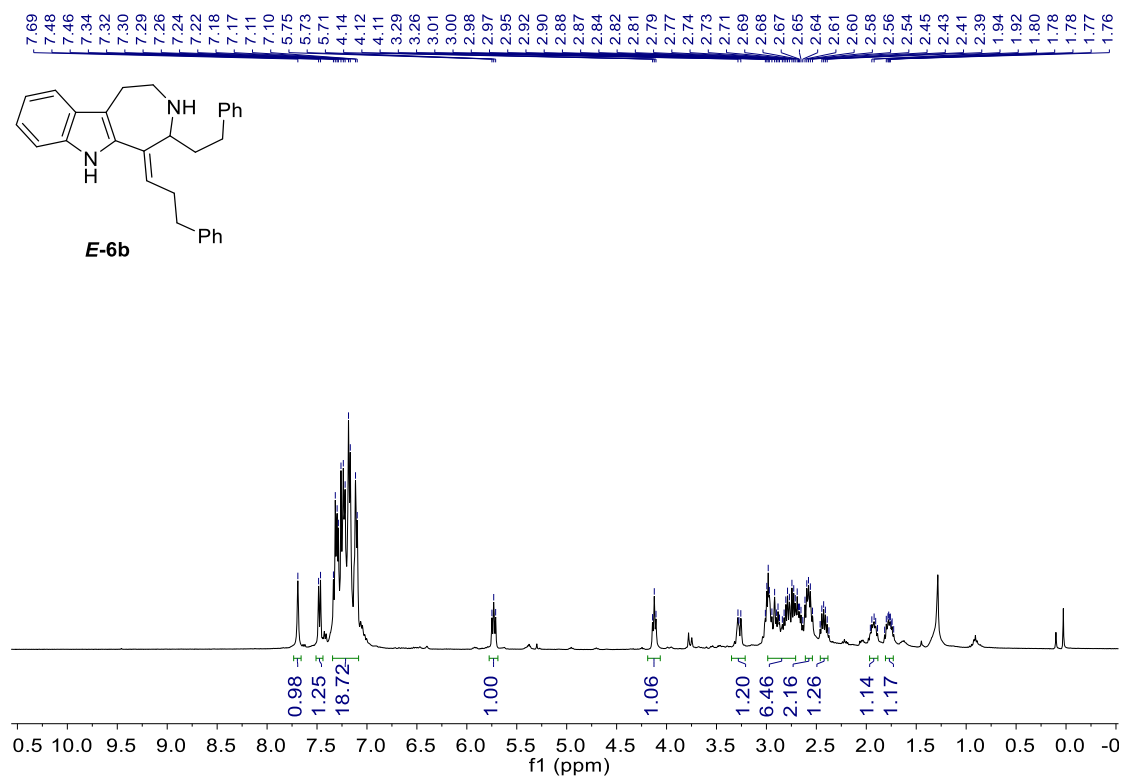

**$^{13}\text{C}$  NMR (100 MHz,  $\text{CDCl}_3$ , compound *E-6b*)**

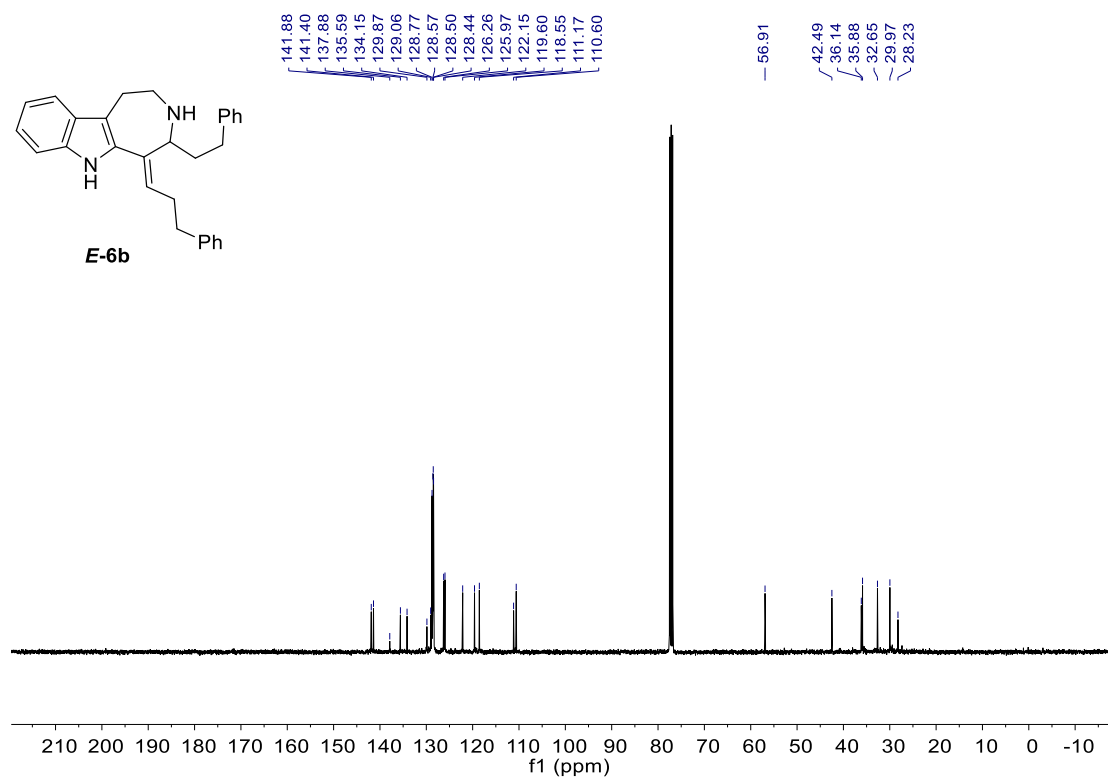

**$^1\text{H}$  NMR (400 MHz,  $\text{CDCl}_3$ , compound **3v**)**

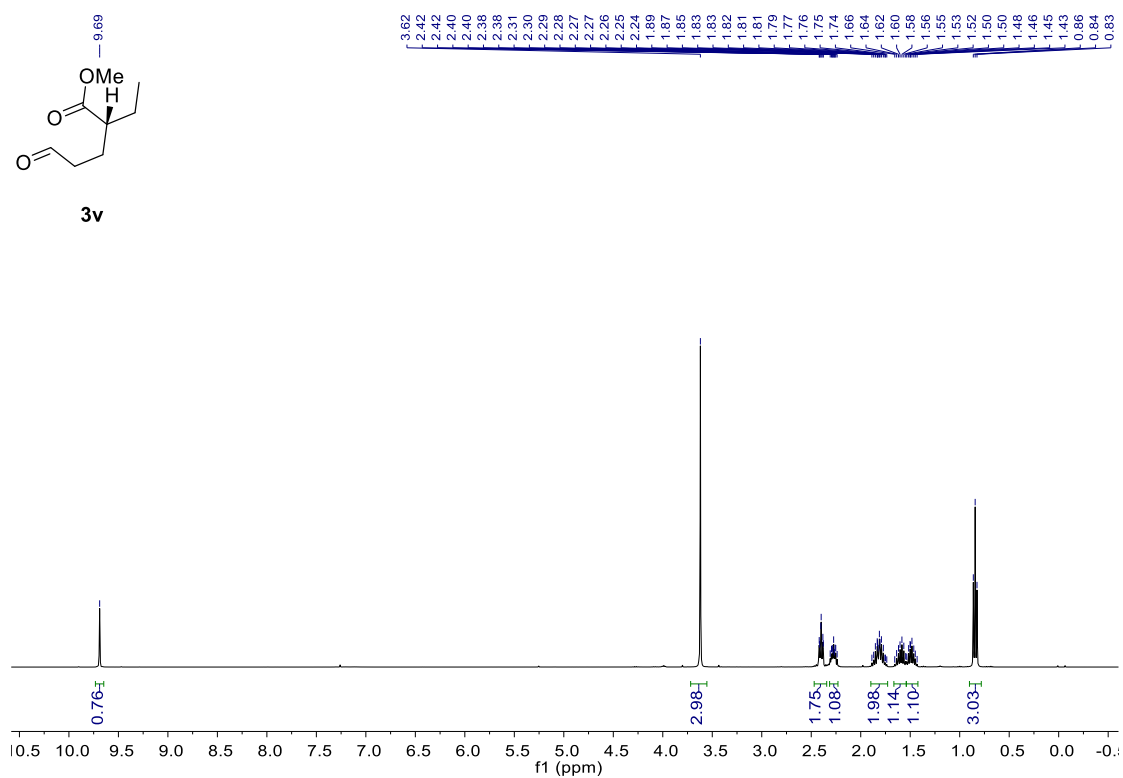

**$^{13}\text{C}$  NMR (100 MHz,  $\text{CDCl}_3$ , compound **3v**)**

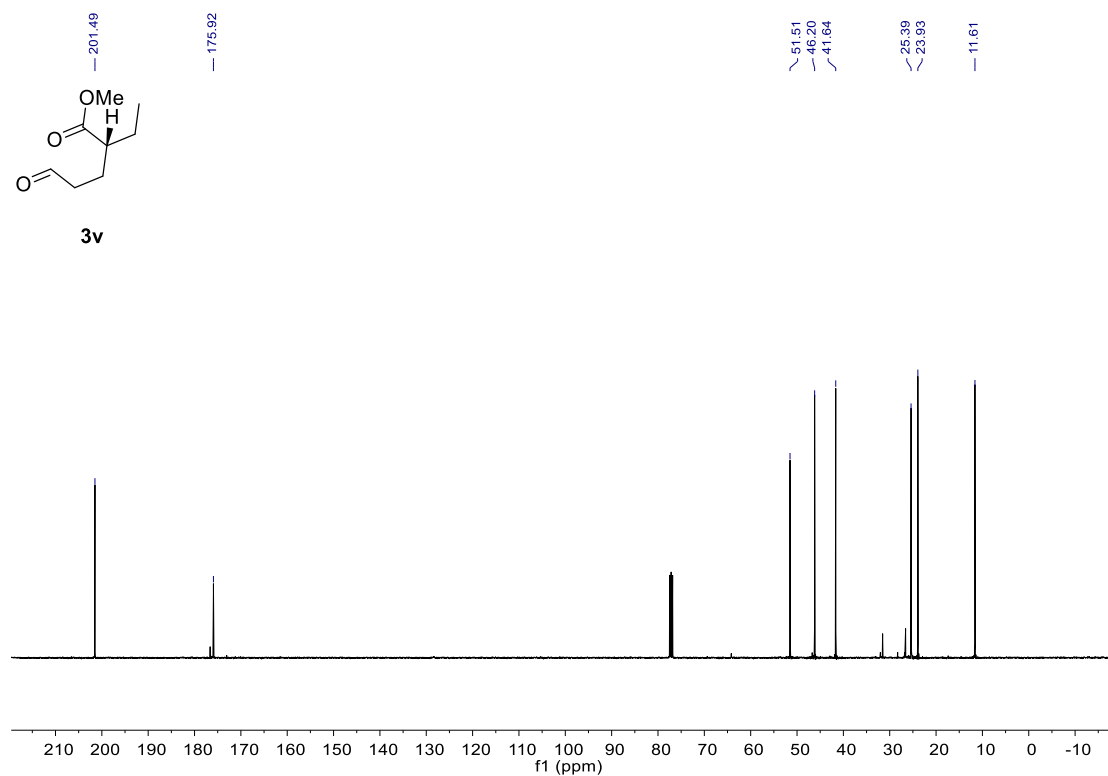

**$^1\text{H}$  NMR (400 MHz,  $\text{CDCl}_3$ , compound **4v**, mixture of diastereomers)**

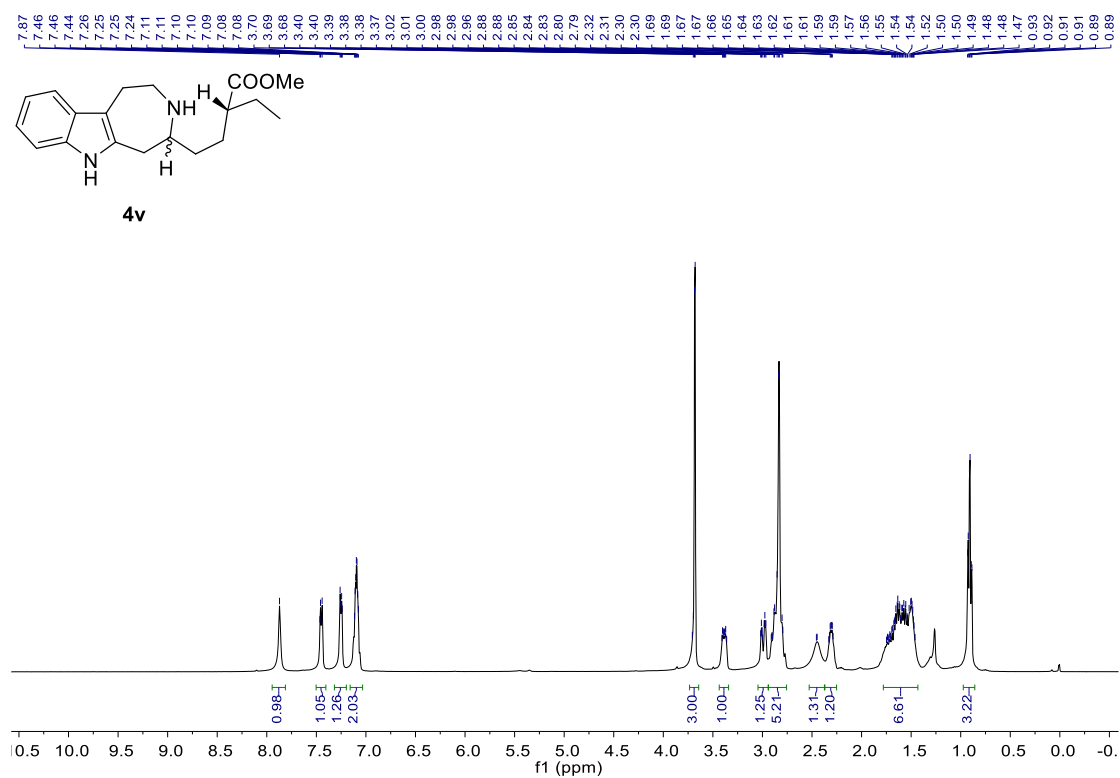

**$^{13}\text{C}$  NMR (100 MHz,  $\text{CDCl}_3$ , compound **4v**, mixture of diastereomers)**

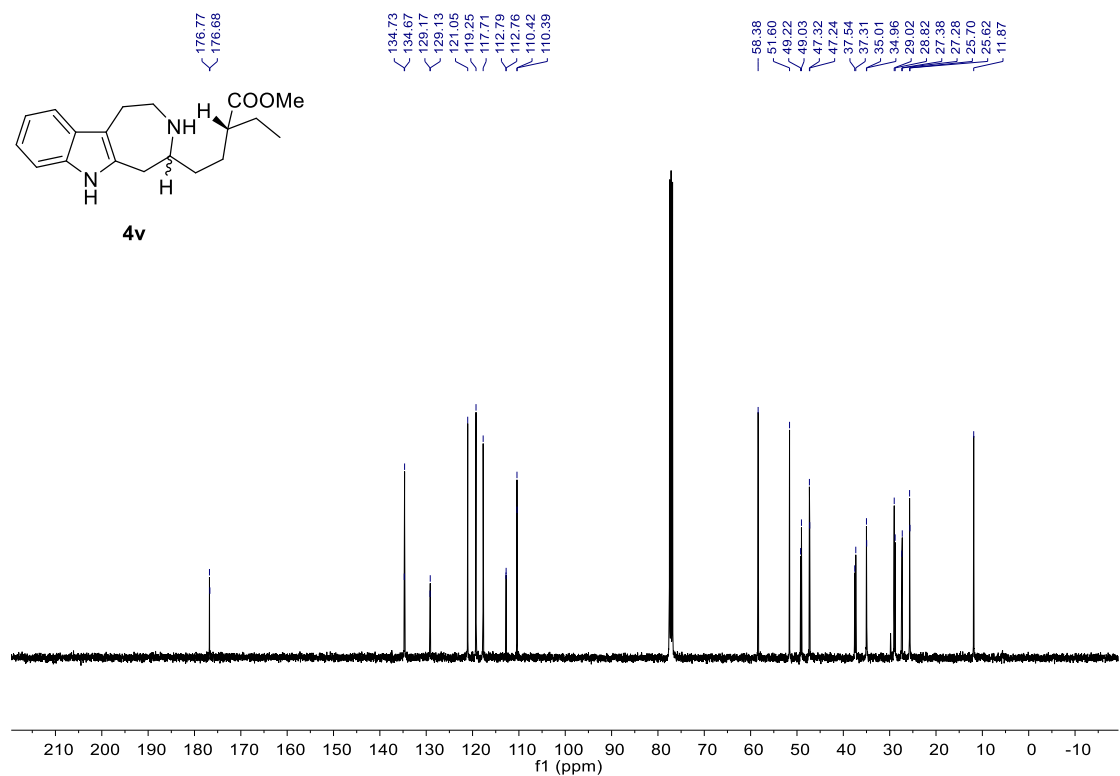

**$^1\text{H}$  NMR (400 MHz,  $\text{CDCl}_3$ , compound **6v**, mixture of diastereomers)**

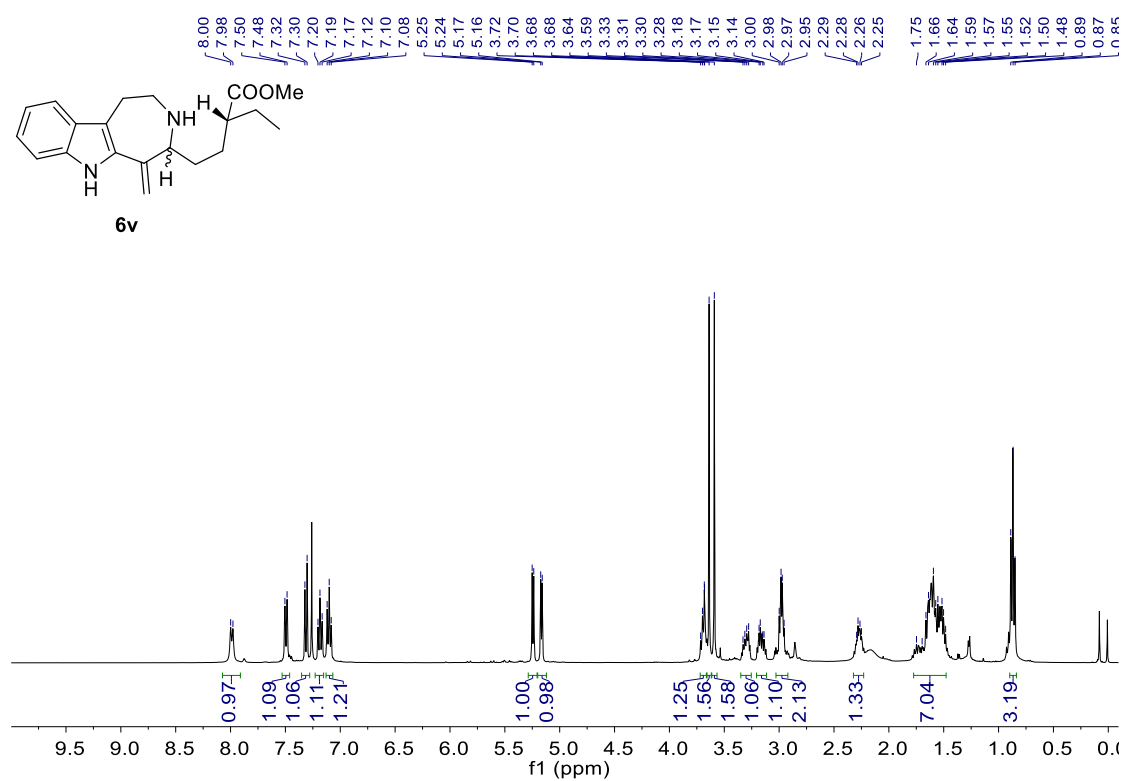

**$^{13}\text{C}$  NMR (100 MHz,  $\text{CDCl}_3$ , compound **6v**, mixture of diastereomers)**

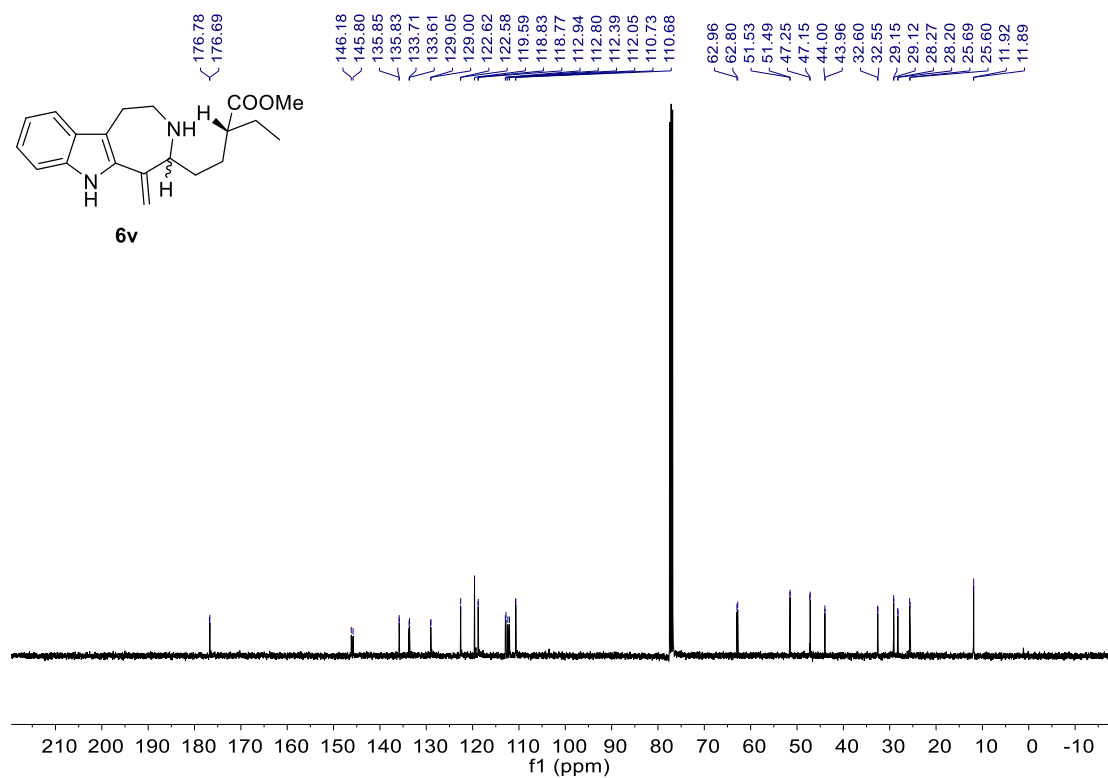

**$^1\text{H}$  NMR (400 MHz, DMSO- $d_6$ , compound **7a**)**

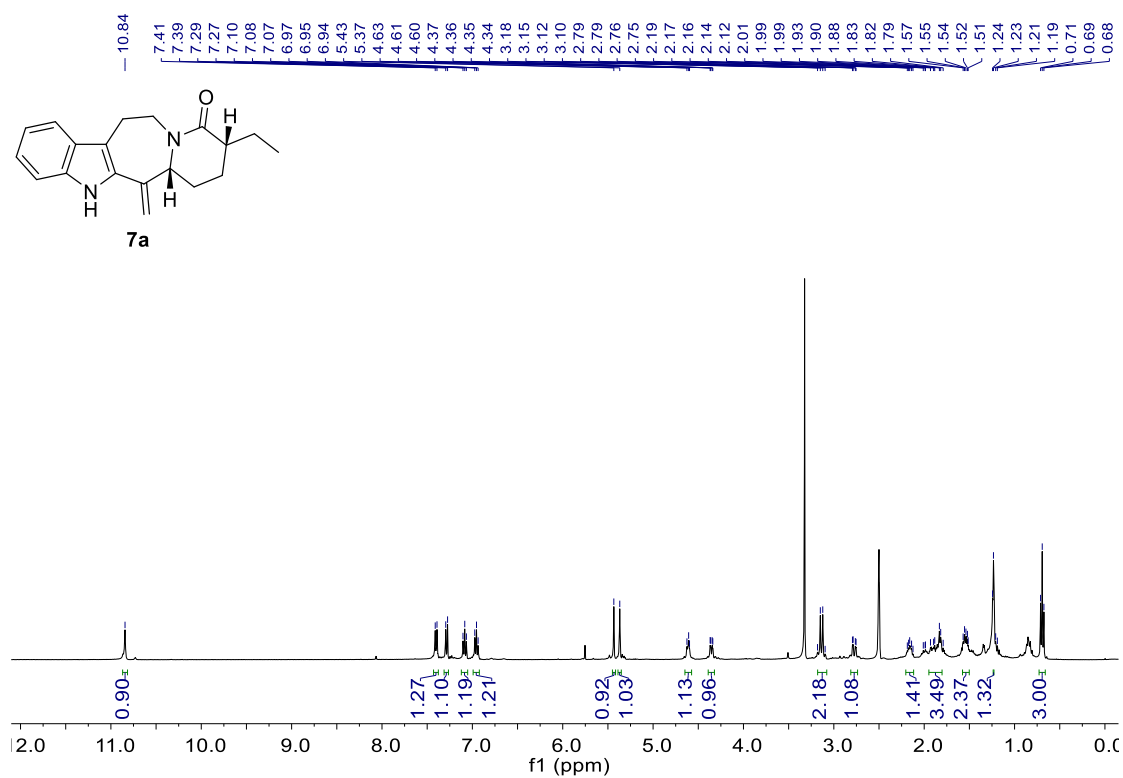

**$^{13}\text{C}$  NMR (100 MHz, DMSO- $d_6$ , compound **7a**)**

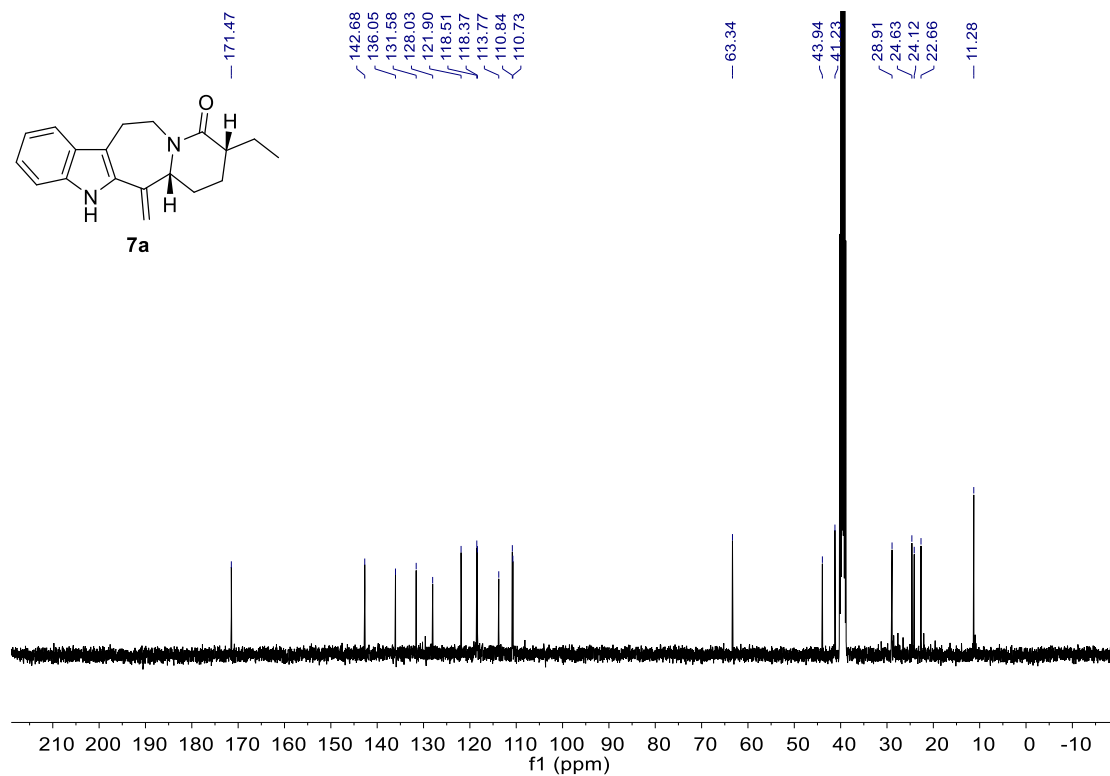

**$^1\text{H}$  NMR (400 MHz, DMSO- $d_6$ , compound **7b**)**

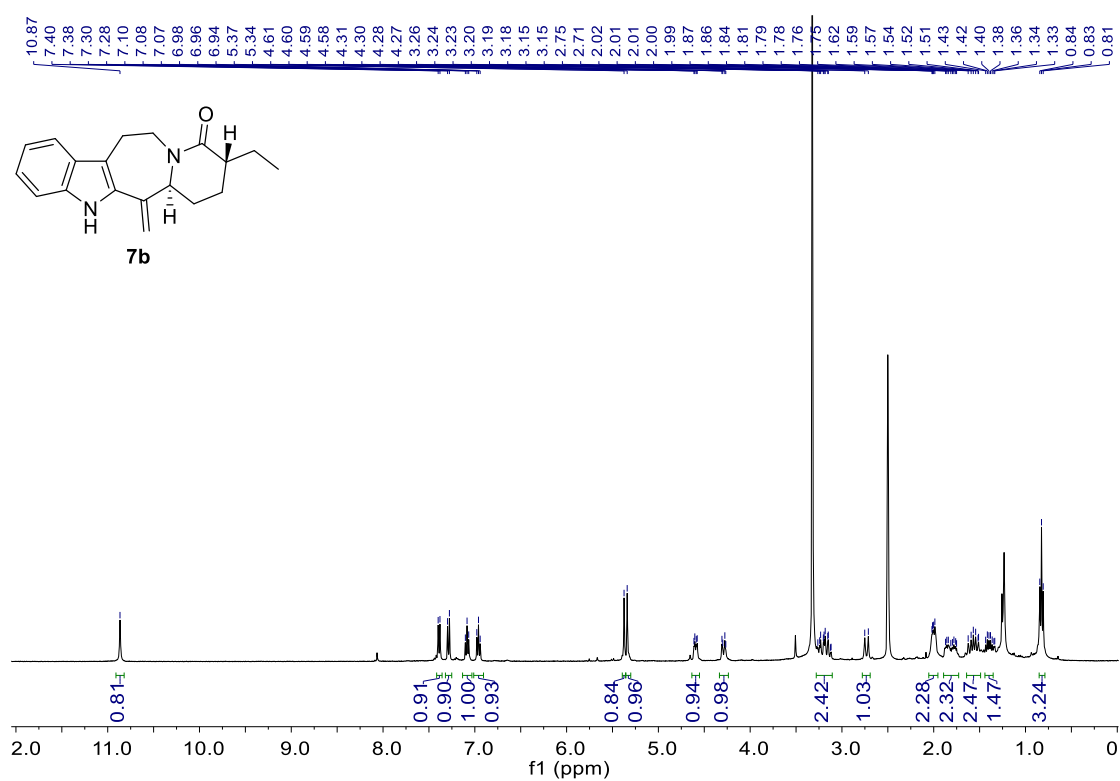

**$^{13}\text{C}$  NMR (100 MHz, DMSO- $d_6$ , compound **7b**)**

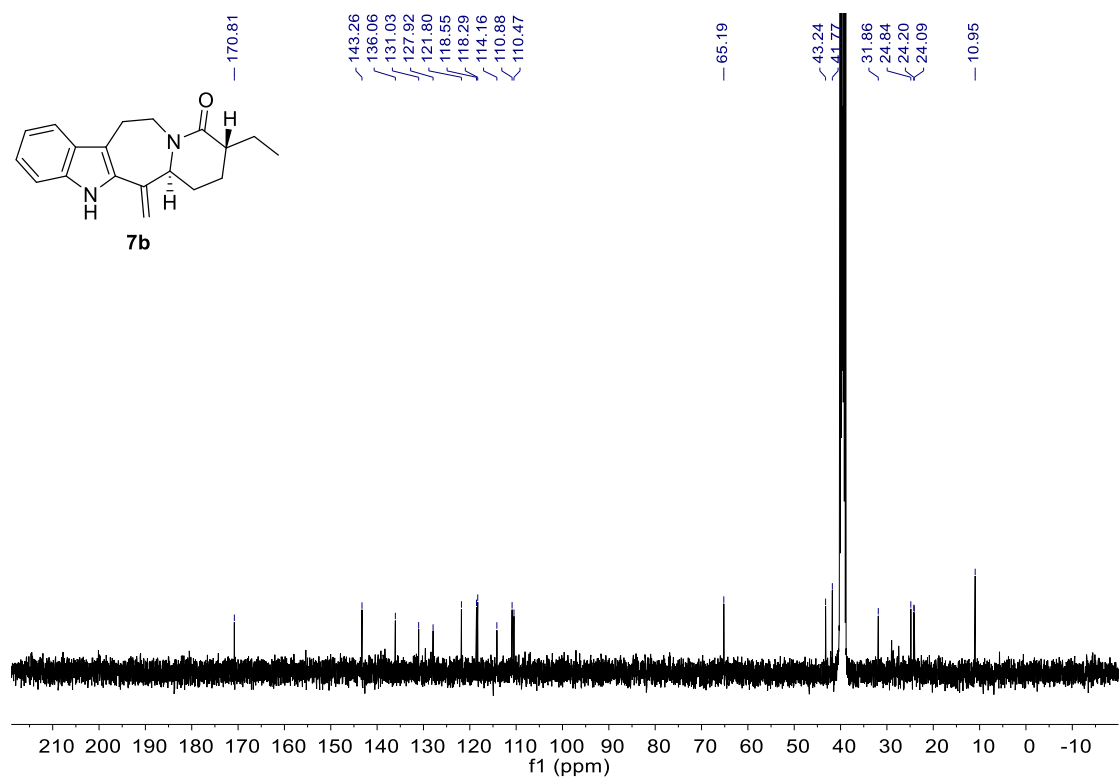

**$^1\text{H}$  NMR (400 MHz,  $\text{CDCl}_3$ , ngouniensine, **1a**)**

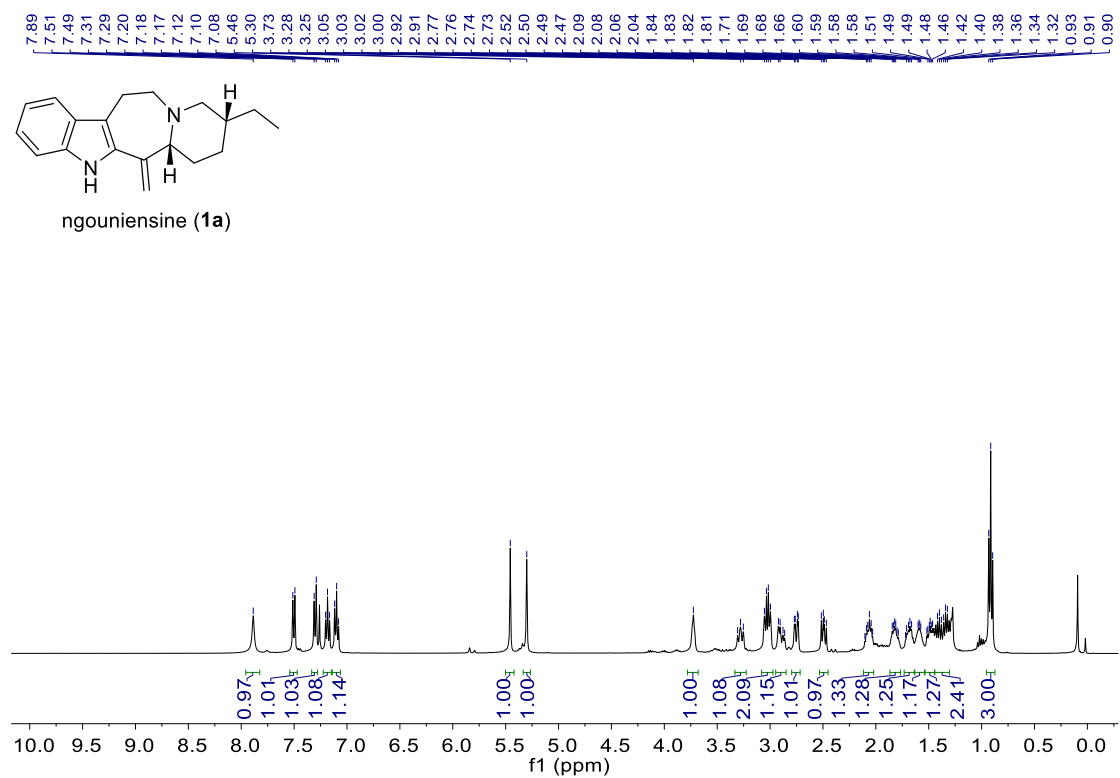

**$^{13}\text{C}$  NMR (100 MHz,  $\text{CDCl}_3$ , ngouniensine, **1a**)**

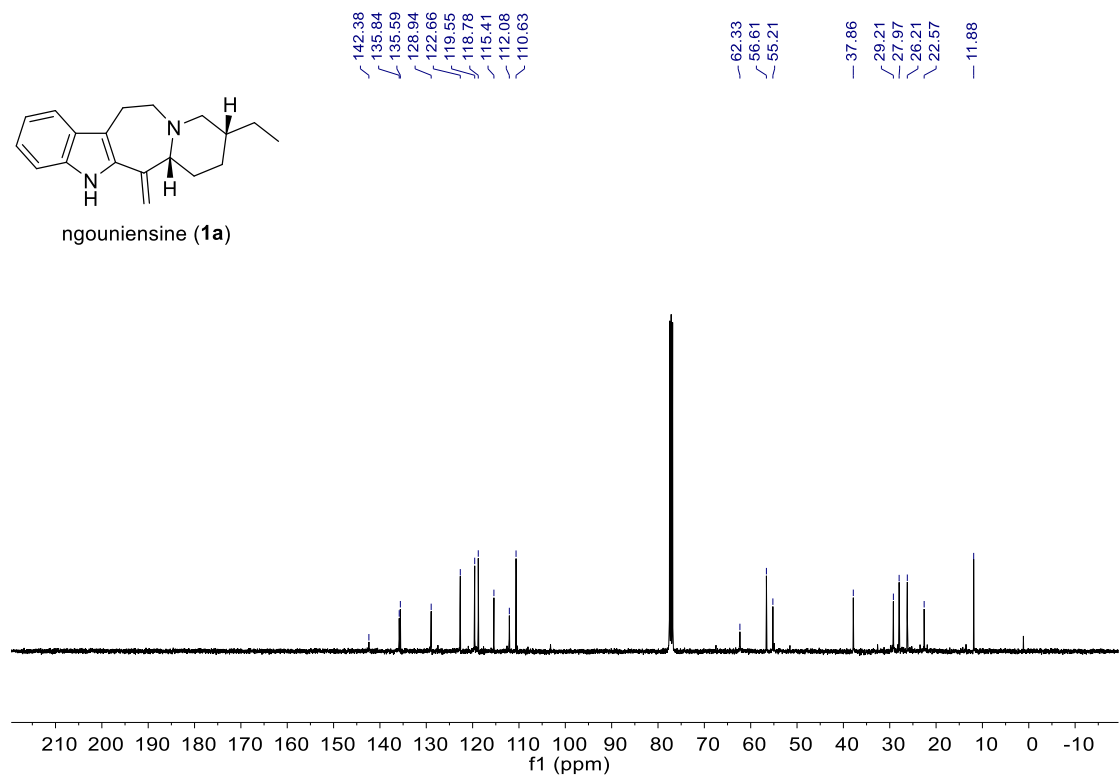

**<sup>1</sup>H NMR (400 MHz, CDCl<sub>3</sub>, epingouniensine, **1b**)**

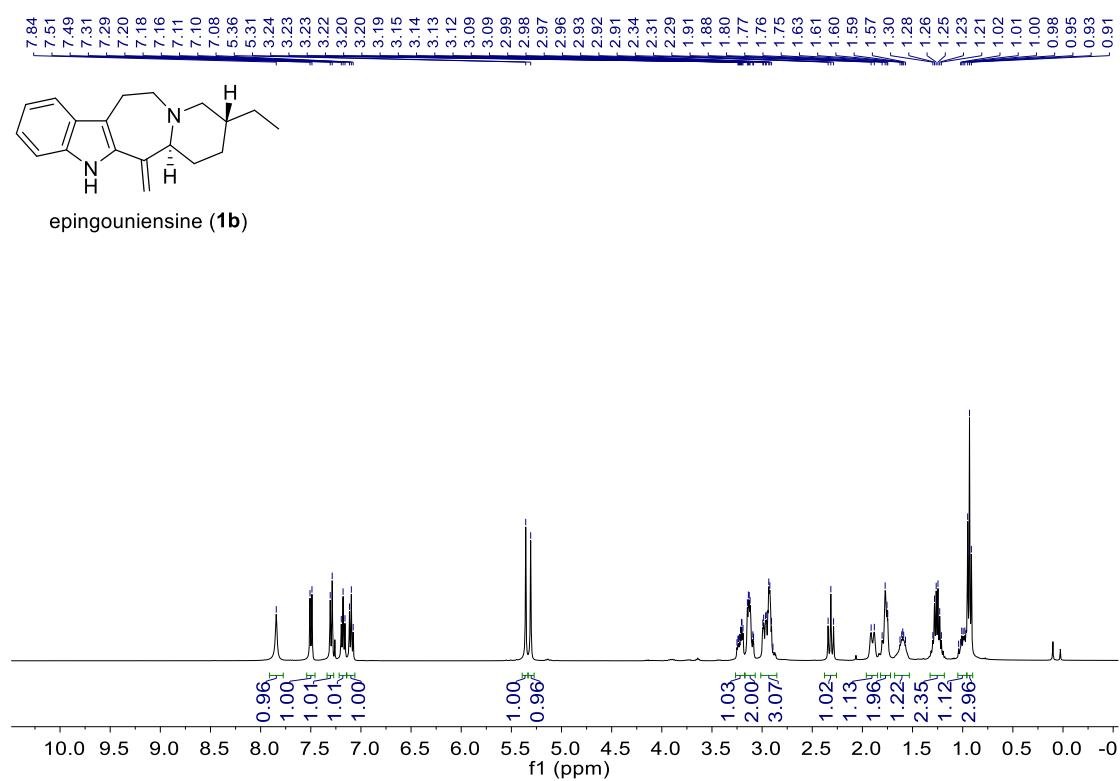

**<sup>13</sup>C NMR (100 MHz, CDCl<sub>3</sub>, epingouniensine, **1b**)**

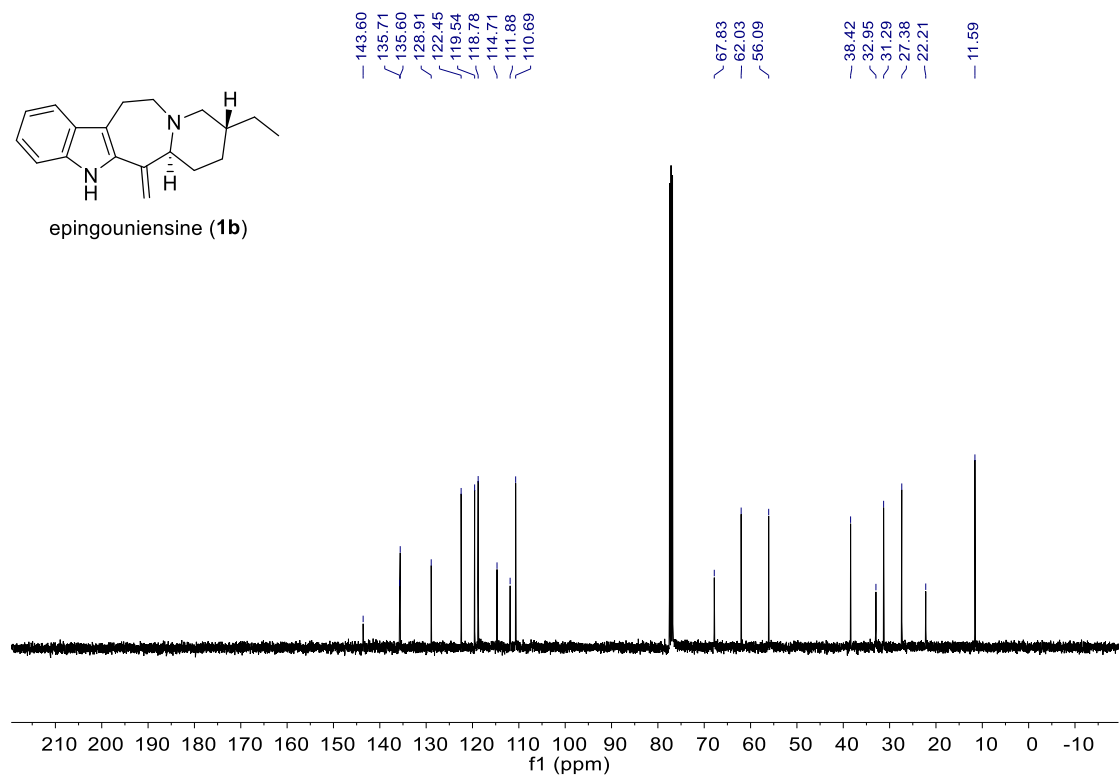

**$^1\text{H}$  NMR (400 MHz,  $\text{CDCl}_3$ , compound **8**)**

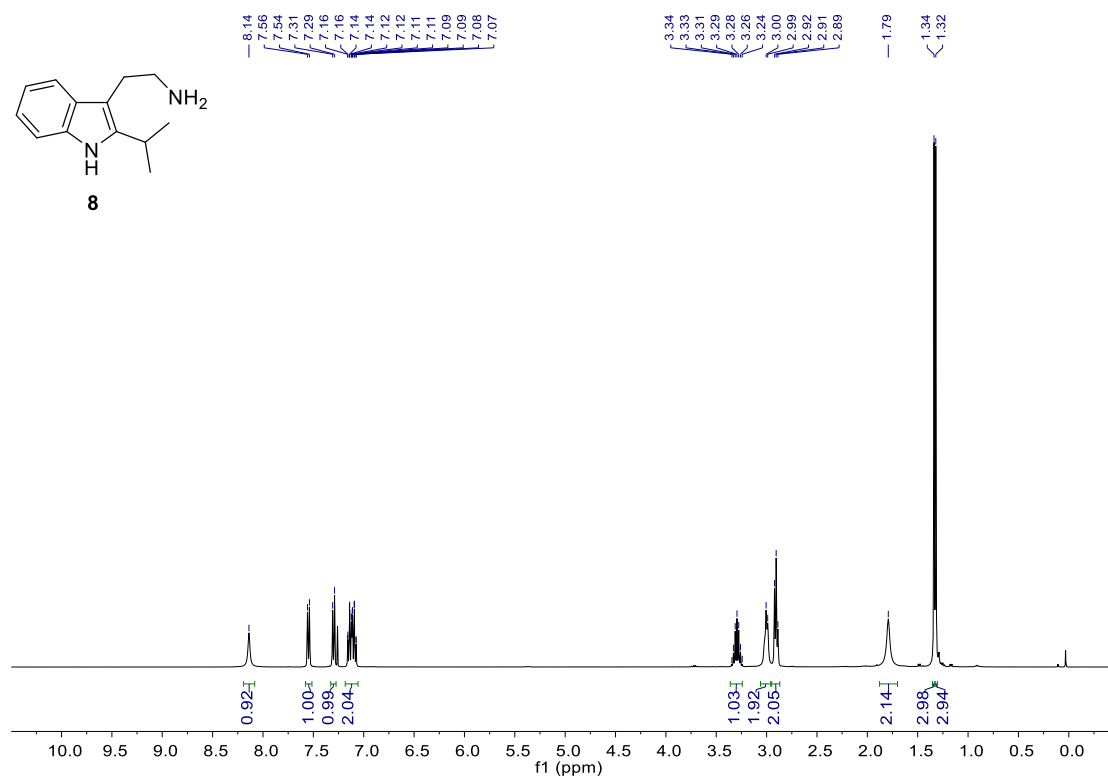

**$^{13}\text{C}$  NMR (100 MHz,  $\text{CDCl}_3$ , compound **8**)**

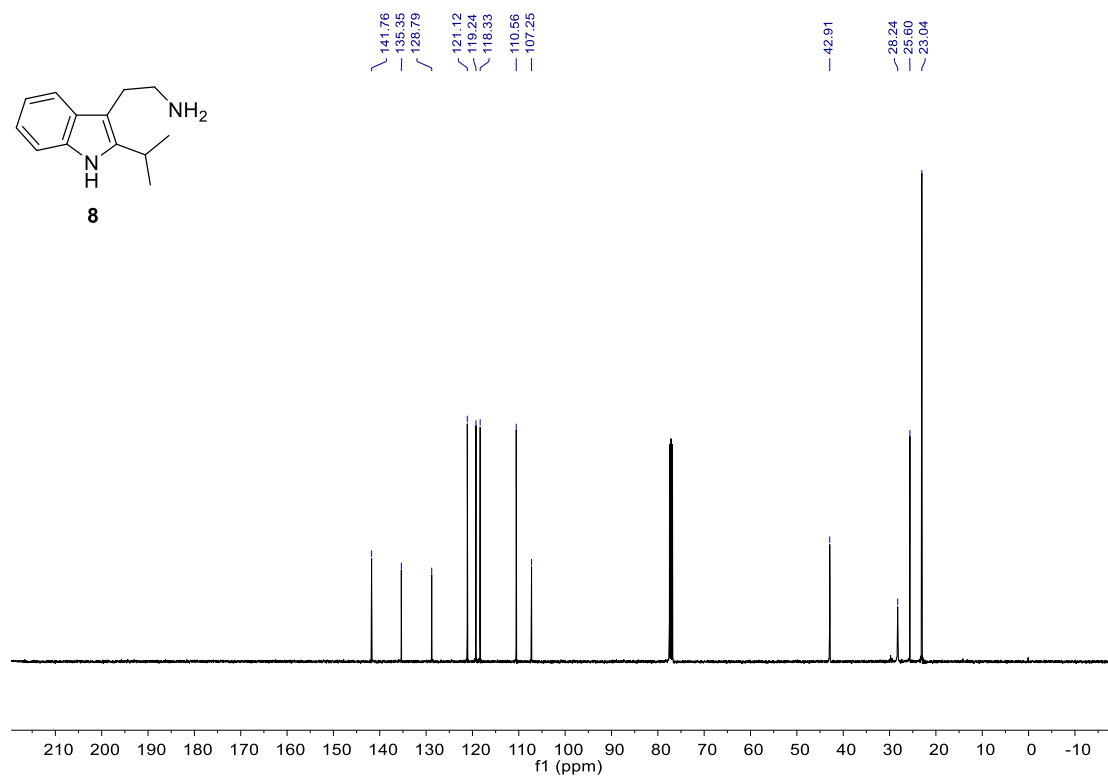

**$^1\text{H}$  NMR (400 MHz,  $\text{CDCl}_3$ , compound **9**, mixture of diastereomers)**

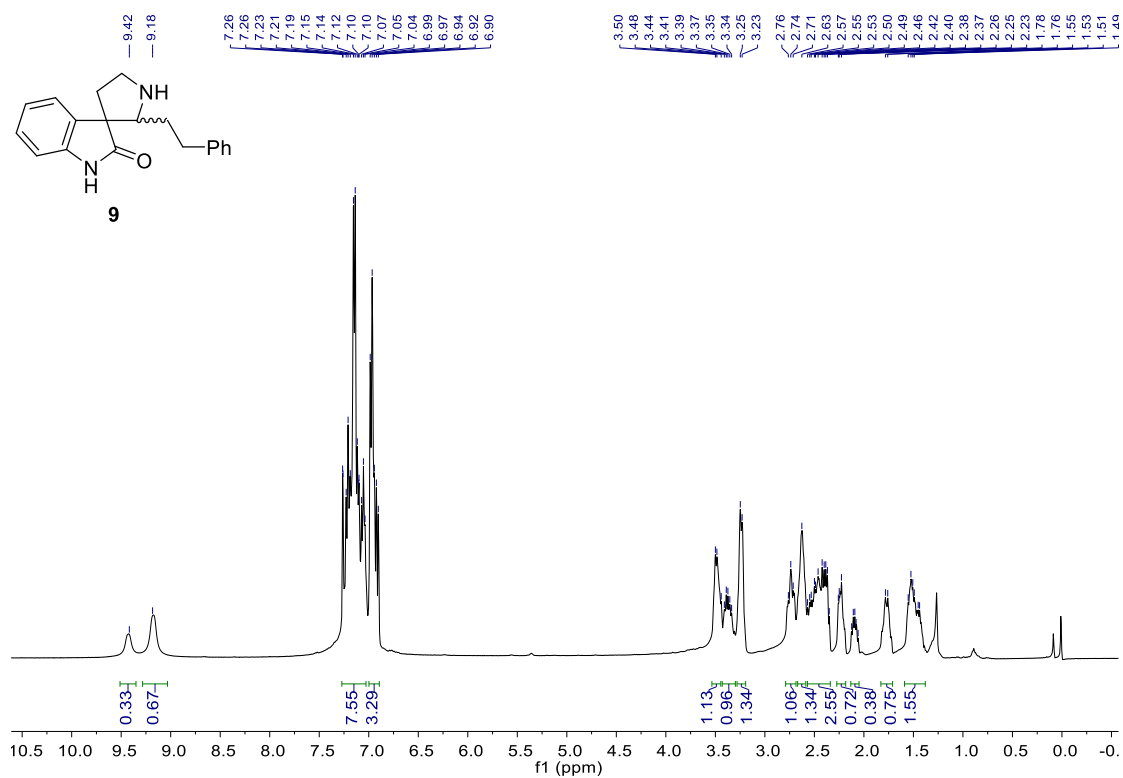

**$^{13}\text{C}$  NMR (100 MHz,  $\text{CDCl}_3$ , compound **9**, mixture of diastereomers)**

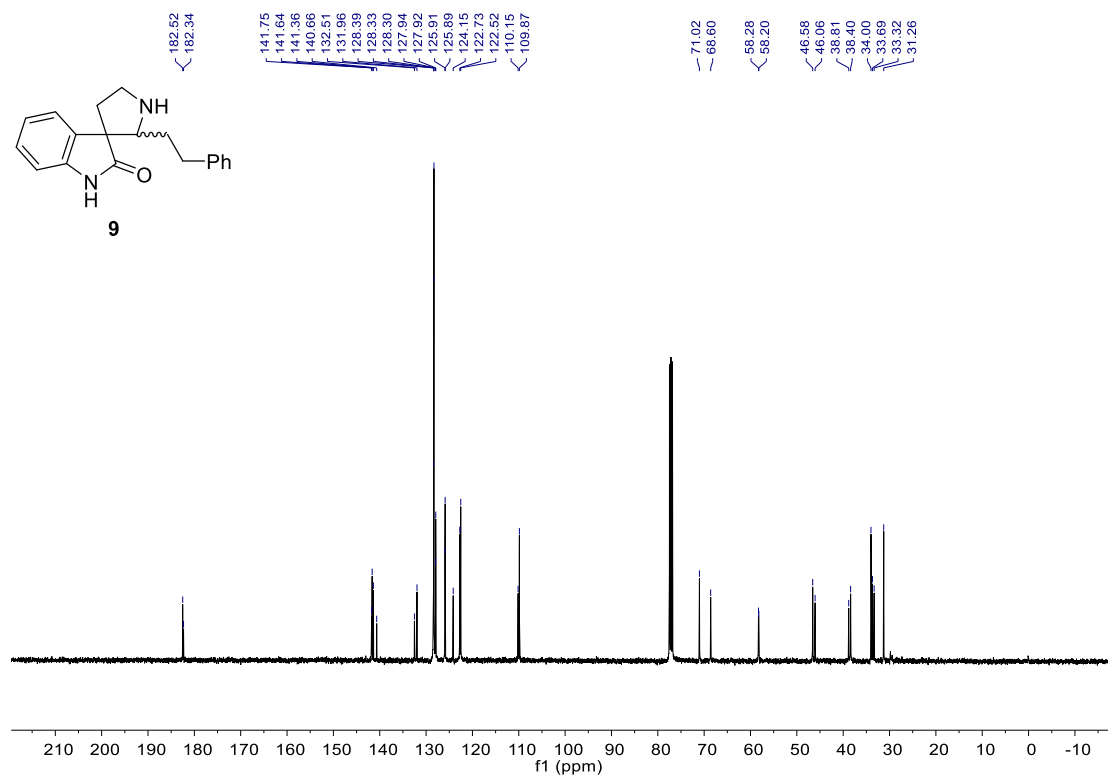

## 7. X-Ray Structures of 4a and Derivatives of 4l and 4t

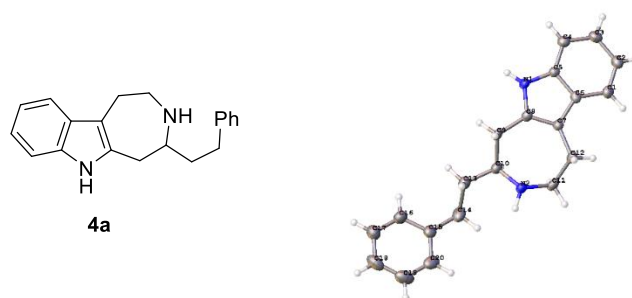

**Table S1:** Crystal data and structure refinement for compound **4a**

|                                                                         |                                                   |
|-------------------------------------------------------------------------|---------------------------------------------------|
| Identification code                                                     | exp_7889                                          |
| Empirical formula                                                       | C <sub>20</sub> H <sub>22</sub> N <sub>2</sub>    |
| Formula weight                                                          | 290.40                                            |
| Temperature / K                                                         | 111.60(14)                                        |
| Crystal system                                                          | monoclinic                                        |
| Space group                                                             | P2 <sub>1</sub>                                   |
| a / Å, b / Å, c / Å                                                     | 6.8833(11), 7.8177(10), 14.677(4)                 |
| α/°, β/°, γ/°                                                           | 90.00, 99.67(2), 90.00                            |
| Volume / Å <sup>3</sup>                                                 | 778.6(3)                                          |
| Z                                                                       | 2                                                 |
| ρ <sub>calc</sub> / mg mm <sup>-3</sup>                                 | 1.239                                             |
| μ / mm <sup>-1</sup>                                                    | 0.073                                             |
| F(000)                                                                  | 312                                               |
| Crystal size / mm <sup>3</sup>                                          | 0.41 × 0.37 × 0.16                                |
| 2θ range for data collection                                            | 6 to 51.98°                                       |
| Index ranges                                                            | -8 ≤ h ≤ 8, -9 ≤ k ≤ 9, -17 ≤ l ≤ 18              |
| Reflections collected                                                   | 6324                                              |
| Independent reflections                                                 | 2965[R(int) = 0.0469 (inf-0.9Å)]                  |
| Data/restraints/parameters                                              | 2965/1/199                                        |
| Goodness-of-fit on F <sup>2</sup>                                       | 1.059                                             |
| Final R indexes [I > 2σ (I) i.e. F <sub>o</sub> > 4σ (F <sub>o</sub> )] | R <sub>1</sub> = 0.0573, wR <sub>2</sub> = 0.1181 |
| Final R indexes [all data]                                              | R <sub>1</sub> = 0.0725, wR <sub>2</sub> = 0.1337 |
| Largest diff. peak/hole / e Å <sup>-3</sup>                             | 0.351/-0.210                                      |
| Flack Parameters                                                        | -2(4)                                             |
| Completeness                                                            | 0.9967                                            |

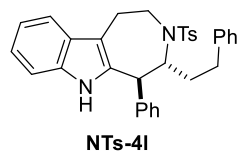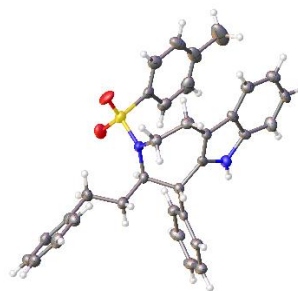

**Table S2:** Crystal data and structure refinement for **NTs-4I**

|                                                                                         |                                                                 |
|-----------------------------------------------------------------------------------------|-----------------------------------------------------------------|
| Identification code                                                                     | exp_8244                                                        |
| Empirical formula                                                                       | C <sub>33</sub> H <sub>32</sub> N <sub>2</sub> O <sub>2</sub> S |
| Formula weight                                                                          | 520.67                                                          |
| Temperature / K                                                                         | 115.00(14)                                                      |
| Crystal system                                                                          | orthorhombic                                                    |
| Space group                                                                             | Pbca                                                            |
| a / Å, b / Å, c / Å                                                                     | 12.115(3), 20.818(4), 21.153(3)                                 |
| $\alpha$ /°, $\beta$ /°, $\gamma$ /°                                                    | 90.00, 90.00, 90.00                                             |
| Volume / Å <sup>3</sup>                                                                 | 5334.8(19)                                                      |
| Z                                                                                       | 8                                                               |
| $\rho_{\text{calc}}$ / mg mm <sup>-3</sup>                                              | 1.297                                                           |
| $\mu$ / mm <sup>-1</sup>                                                                | 0.155                                                           |
| F(000)                                                                                  | 2208                                                            |
| Crystal size / mm <sup>3</sup>                                                          | 0.37 × 0.28 × 0.05                                              |
| 2 $\theta$ range for data collection                                                    | 6.44 to 52°                                                     |
| Index ranges                                                                            | -14 ≤ h ≤ 11, -25 ≤ k ≤ 23, -26 ≤ l ≤ 25                        |
| Reflections collected                                                                   | 20010                                                           |
| Independent reflections                                                                 | 5213[R(int) = 0.1344 (inf-0.9Å)]                                |
| Data/restraints/parameters                                                              | 5213/0/344                                                      |
| Goodness-of-fit on F <sup>2</sup>                                                       | 1.029                                                           |
| Final R indexes [I > 2 $\sigma$ (I) i.e. F <sub>o</sub> > 4 $\sigma$ (F <sub>o</sub> )] | R <sub>1</sub> = 0.0783, wR <sub>2</sub> = 0.1267               |
| Final R indexes [all data]                                                              | R <sub>1</sub> = 0.1700, wR <sub>2</sub> = 0.1670               |
| Largest diff. peak/hole / e Å <sup>-3</sup>                                             | 0.378/-0.309                                                    |
| Flack Parameters                                                                        | N                                                               |
| Completeness                                                                            | 0.9968                                                          |

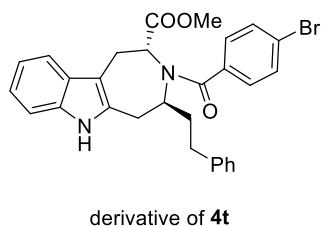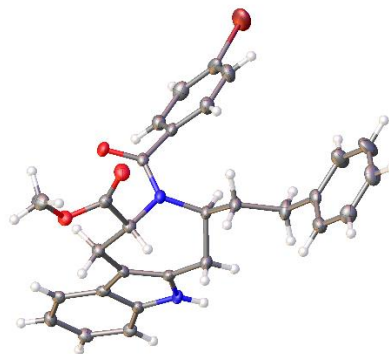

**Table S3:** Crystal data and structure refinement for derivative of **4t**

|                                                                         |                                                                 |
|-------------------------------------------------------------------------|-----------------------------------------------------------------|
| Identification code                                                     | exp_8216                                                        |
| Empirical formula                                                       | C <sub>29</sub> H <sub>27</sub> BrN <sub>2</sub> O <sub>3</sub> |
| Formula weight                                                          | 531.43                                                          |
| Temperature / K                                                         | 116.5(3)                                                        |
| Crystal system                                                          | triclinic                                                       |
| Space group                                                             | P1                                                              |
| a / Å, b / Å, c / Å                                                     | 7.1378(8), 8.1657(5), 11.6045(11)                               |
| α/°, β/°, γ/°                                                           | 85.389(6), 79.331(9), 68.354(8)                                 |
| Volume / Å <sup>3</sup>                                                 | 617.75(11)                                                      |
| Z                                                                       | 1                                                               |
| ρ <sub>calc</sub> / mg mm <sup>-3</sup>                                 | 1.429                                                           |
| μ / mm <sup>-1</sup>                                                    | 2.539                                                           |
| F(000)                                                                  | 274                                                             |
| Crystal size / mm <sup>3</sup>                                          | 0.350 × 0.060 × 0.015                                           |
| 2θ range for data collection                                            | 7.754 to 142.214°                                               |
| Index ranges                                                            | -8 ≤ h ≤ 8, -9 ≤ k ≤ 9, -13 ≤ l ≤ 14                            |
| Reflections collected                                                   | 8110                                                            |
| Independent reflections                                                 | 4161[R(int) = 0.0405 (inf-0.9Å)]                                |
| Data/restraints/parameters                                              | 4161/3/317                                                      |
| Goodness-of-fit on F <sup>2</sup>                                       | 1.055                                                           |
| Final R indexes [I > 2σ (I) i.e. F <sub>o</sub> > 4σ (F <sub>o</sub> )] | R <sub>1</sub> = 0.0367, wR <sub>2</sub> = 0.0888               |
| Final R indexes [all data]                                              | R <sub>1</sub> = 0.0390, wR <sub>2</sub> = 0.0911               |
| Largest diff. peak/hole / e Å <sup>-3</sup>                             | 0.543/-0.285                                                    |
| Flack Parameters                                                        | -0.017(14)                                                      |
| Completeness                                                            | 0.9991                                                          |

---

## 8. Computational Studies

### 8.1 Computational Methods

DFT calculations were performed with Gaussian 09.<sup>1</sup> Geometry optimizations of all the stationary points were carried out using the PBE0 functional,<sup>2</sup> which performs well in previous mechanistic study of Pictet-Spengler Reactions.<sup>3</sup> The D3(BJ) version of Grimme's dispersion<sup>4</sup> was added due to the existence of hydrogen bonding in the reaction system. The 6-31+G(d,p) basis set<sup>5</sup> was used for all atoms. The SMD<sup>6</sup> implicit solvation model was used to account for solvation effects of CHCl<sub>3</sub>. On the basis of the optimized structures, single-point energies were computed at the SMD(CHCl<sub>3</sub>)/PBE0-D3(BJ)/6-311+G(d,p) level. All the discussed energy differences were based on Gibbs energies at 298 K. Reference states for solutes in CHCl<sub>3</sub> solution are the hypothetical states at 1 mol/L, respectively.

### 8.2 Mechanism of the reaction between tryptamine derivatives and aromatic aldehydes

We have also computed the free energy profile of the reaction between tryptamine derivatives and aromatic aldehydes (**Figure S1**). For **5a** is the simplest product in **Scheme 2**, the reaction between substrate **2a** and benzaldehyde was chosen as the model reaction. Substrate **2a-TFA** will first react with benzaldehyde to form imine intermediate **Int7**. Subsequently, the intramolecular Pictet-Spengler type cyclization (via **TS5**) gives the spiroindolenine **Int8**. This step has an activation free energy of 13.6 kcal/mol. The tautomerization of imine to enamine **Int9** has an activation free energy of 16.1 kcal/mol. With excess benzaldehyde, iminium ion **Int10** can be generated and then undergoes a Mannich-type cyclization via **TS7** to give **Int11**, which requires an activation free energy of 5.5 kcal/mol.

**Int11** might undergo two different reaction pathways (**Figure S1b**). The first pathway is similar to the transformation of **Int5** to **4d-TFA**, which involves a retro-Mannich reaction, following with the hydrolysis of iminium ion **Int12** to generate the 7-membered ring product **5a'-TFA**. The second pathway gives the elimination product **5a-TFA**, which was obtained in experiment. Firstly, imine/enamine tautomerization of **Int11** will form **Int13**, with an activation free energy of 18.3 kcal/mol. **Int13** will be protonated by TFA to give **Int14**, and then undergo a formal retro-Diels-Alder reaction to generate **Int16**, which is a step-wise process rather than a concerted reaction. The 6-membered ring in **Int14** could open via **TS10**, generating imine **Int15**, with an activation free energy of 25.4 kcal/mol. This step could be regarded as a retro-Michael addition. Subsequently, a retro-Pictet-Spengler type

reaction will take place via **TS11**, giving **Int16** as a product. This step has an activation free energy of 5.7 kcal/mol. Finally, the hydrolysis of **Int16** generates the alkene product **5a-TFA**.

Although the second pathway has a higher energy barrier than the first one (24.8 kcal/mol vs. 6.7 kcal/mol), alkene product **5a** was obtained as the only product. This could be explained thermodynamically, namely, **Int16** is thermodynamically more stable than the kinetically favored product **5a'-TFA**. Thus, **5a'-TFA** can return to **Int11** through a Mannich-type cyclization, then the second pathway can take place to generate **Int16**.

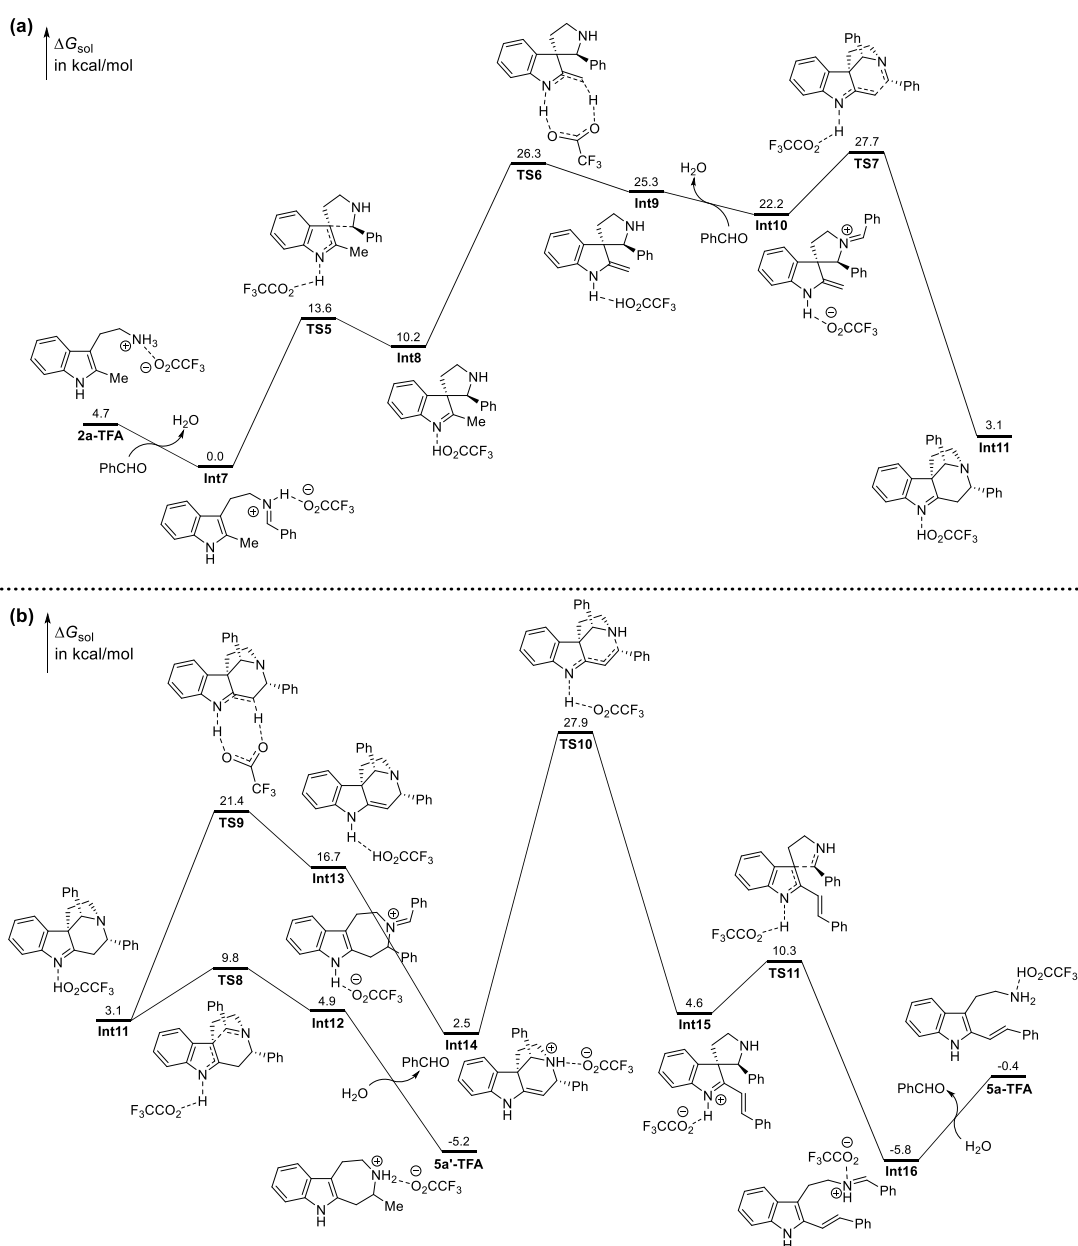

**Figure S1.** Gibbs energy profile for the reaction between substrate **2a** and benzaldehyde. Computed at the SMD(CHCl<sub>3</sub>)/PBE0-D3BJ/6-311+G(d,p)//PBE0-D3BJ/6-31+G(d,p) level.

Computed Energies for the Stationary Points:

**Table S4.** Thermal corrections to Gibbs free energies (TCGs), single-point energies (SPEs) and Gibbs free energies(Gs).

| Entry                    | TCG / Hartree <sup>a</sup> | SPE / Hartree <sup>b</sup> | G / Hartree  |
|--------------------------|----------------------------|----------------------------|--------------|
| <b>H<sub>2</sub>O</b>    | 0.003989                   | -76.3796294                | -76.3756404  |
| <b>CH<sub>3</sub>CHO</b> | 0.030849                   | -153.7056147               | -153.6747657 |
| <b>PhCHO</b>             | 0.080084                   | -345.2796423               | -345.1995583 |
| <b>2a-TFA</b>            | 0.223849                   | -1063.147872               | -1062.924023 |
| <b>Int1</b>              | 0.249699                   | -1140.484076               | -1140.234377 |
| <b>TS1</b>               | 0.254921                   | -1140.46557                | -1140.210649 |
| <b>Int2</b>              | 0.25599                    | -1140.475912               | -1140.219922 |
| <b>TS2</b>               | 0.254366                   | -1140.452562               | -1140.198196 |
| <b>Int3</b>              | 0.257062                   | -1140.456442               | -1140.19938  |
| <b>Int4</b>              | 0.289077                   | -1217.792918               | -1217.503841 |
| <b>TS3</b>               | 0.291507                   | -1217.789241               | -1217.497734 |
| <b>Int5</b>              | 0.290944                   | -1217.828776               | -1217.537832 |
| <b>TS4</b>               | 0.292509                   | -1217.817771               | -1217.525262 |
| <b>Int6</b>              | 0.290474                   | -1217.822038               | -1217.531564 |
| <b>4d-TFA</b>            | 0.259896                   | -1140.505433               | -1140.245537 |
| <b>Int7</b>              | 0.301514                   | -1332.060826               | -1331.759312 |
| <b>TS5</b>               | 0.3054                     | -1332.043077               | -1331.737677 |
| <b>Int8</b>              | 0.30359                    | -1332.046684               | -1331.743094 |
| <b>TS6</b>               | 0.304013                   | -1332.021422               | -1331.717409 |
| <b>Int9</b>              | 0.306609                   | -1332.025554               | -1331.718945 |
| <b>Int10</b>             | 0.386544                   | -1600.934342               | -1600.547798 |
| <b>TS7</b>               | 0.389199                   | -1600.928301               | -1600.539102 |
| <b>Int11</b>             | 0.388473                   | -1600.966689               | -1600.578216 |
| <b>TS8</b>               | 0.389458                   | -1600.957144               | -1600.567686 |
| <b>Int12</b>             | 0.388481                   | -1600.963875               | -1600.575394 |
| <b>5a'-TFA</b>           | 0.306541                   | -1332.074098               | -1331.767557 |
| <b>TS9</b>               | 0.386376                   | -1600.935549               | -1600.549173 |
| <b>Int13</b>             | 0.389131                   | -1600.945671               | -1600.55654  |
| <b>Int14</b>             | 0.390199                   | -1600.969462               | -1600.579263 |
| <b>TS10</b>              | 0.3867                     | -1600.925407               | -1600.538707 |
| <b>Int15</b>             | 0.382376                   | -1600.958233               | -1600.575857 |
| <b>TS11</b>              | 0.38532                    | -1600.952062               | -1600.566742 |
| <b>Int16</b>             | 0.383997                   | -1600.976458               | -1600.592461 |
| <b>5a-TFA</b>            | 0.301189                   | -1332.06115                | -1331.759961 |

<sup>a</sup>Computed at the PBE0-D3BJ/6-31+G(d,p) level.

<sup>b</sup>Computed at the SMD(CHCl<sub>3</sub>)/PBE0-D3BJ/6-311+G(d,p) level.

---

Cartesian coordinates for the stationary points:

**H<sub>2</sub>O**

|   |            |             |             |   |             |            |            |
|---|------------|-------------|-------------|---|-------------|------------|------------|
| O | 0.00000000 | 0.00000000  | 0.11609800  | H | -1.07218900 | 0.06240200 | 2.28065100 |
| H | 0.00000000 | 0.76584000  | -0.46439000 | C | 1.66542800  | 0.99222900 | 0.88980400 |
| H | 0.00000000 | -0.76584000 | -0.46439000 | C | 1.42434100  | 2.45336200 | 0.69076100 |

**CH<sub>3</sub>CHO**

|   |             |             |             |   |             |             |             |
|---|-------------|-------------|-------------|---|-------------|-------------|-------------|
| C | 1.16425400  | -0.14908300 | 0.00000500  | H | 2.29765000  | 2.89663600  | 0.19688800  |
| H | 1.70413400  | 0.22241000  | -0.87927400 | H | 1.31784400  | 2.98426000  | 1.64373300  |
| H | 1.70397700  | 0.22199400  | 0.87956000  | H | 0.18019300  | 3.75656600  | -0.53738900 |
| H | 1.15255400  | -1.24033800 | -0.00024000 | H | -0.73399100 | 2.61199800  | 0.45610600  |
| C | -0.22958900 | 0.39871400  | 0.00003600  | O | -2.70591700 | 1.12503200  | -1.46269100 |
| H | -0.30623700 | 1.50846400  | 0.00014600  | H | 0.99299500  | -1.96801800 | 1.89555400  |
| O | -1.23280200 | -0.27628900 | -0.00005500 | C | -2.39382500 | 0.15765200  | -0.76824400 |

**PhCHO**

|   |             |             |            |   |             |             |             |
|---|-------------|-------------|------------|---|-------------|-------------|-------------|
| C | 0.57849000  | -2.14906600 | 0.00000000 | C | -3.51357500 | -0.76368300 | -0.22278000 |
| C | 1.61933800  | -1.22206000 | 0.00000000 | F | -3.25525900 | -2.05730300 | -0.47593900 |
| C | 1.32854700  | 0.13904100  | 0.00000000 | F | -3.60299600 | -0.62772200 | 1.12031900  |
| C | 0.00000000  | 0.57190800  | 0.00000000 | F | -4.71030600 | -0.47743400 | -0.73629900 |
| C | -1.04256200 | -0.36223400 | 0.00000000 | N | 0.04350400  | 1.76738300  | -1.25776700 |
| C | -0.75144700 | -1.71963600 | 0.00000000 | H | -0.69636000 | 2.04962700  | -1.90501400 |
| H | 0.80233600  | -3.21211100 | 0.00000000 | H | 0.92010800  | 1.61787500  | -1.75429700 |
| H | 2.65106000  | -1.56056200 | 0.00000000 | H | -0.40069600 | 0.77163200  | -0.84695700 |
| H | 2.13168400  | 0.87306700  | 0.00000000 |   |             |             |             |
| H | -2.06619500 | 0.00067400  | 0.00000000 |   |             |             |             |
| H | -1.55625600 | -2.44880200 | 0.00000000 |   |             |             |             |
| C | -0.28998100 | 2.01943100  | 0.00000000 |   |             |             |             |
| H | 0.60909300  | 2.67367400  | 0.00000000 |   |             |             |             |
| O | -1.40325500 | 2.50122000  | 0.00000000 |   |             |             |             |

**2a-TFA**

|   |             |             |             |  |  |  |  |
|---|-------------|-------------|-------------|--|--|--|--|
| C | 2.55001100  | 0.18707100  | 0.09312100  |  |  |  |  |
| C | 2.36162600  | -1.15971000 | 0.49594500  |  |  |  |  |
| C | 3.05842900  | -2.21557900 | -0.08898300 |  |  |  |  |
| C | 3.95666400  | -1.90952100 | -1.10374600 |  |  |  |  |
| C | 4.16358300  | -0.58187200 | -1.51739300 |  |  |  |  |
| C | 3.47230400  | 0.46756000  | -0.92660500 |  |  |  |  |
| C | 0.98255800  | 0.13437900  | 1.72289700  |  |  |  |  |
| H | 2.90120500  | -3.24224400 | 0.22909800  |  |  |  |  |
| H | 4.51016600  | -2.71050000 | -1.58426300 |  |  |  |  |
| H | 4.88039800  | -0.37674300 | -2.30700500 |  |  |  |  |
| H | 3.66105900  | 1.49144600  | -1.24325200 |  |  |  |  |
| N | 1.42448100  | -1.14914000 | 1.49981800  |  |  |  |  |
| C | -0.11319800 | 0.40264800  | 2.68892900  |  |  |  |  |
| H | 0.05650700  | -0.10818100 | 3.64296500  |  |  |  |  |
| H | -0.19146400 | 1.47291700  | 2.89445500  |  |  |  |  |

**Int1**

|   |             |             |             |
|---|-------------|-------------|-------------|
| C | 3.04467000  | -0.10731600 | -0.58698100 |
| C | 3.53330200  | 1.02623900  | 0.11006400  |
| C | 4.85060900  | 1.11674800  | 0.55796000  |
| C | 5.68921200  | 0.03874500  | 0.30293100  |
| C | 5.22674800  | -1.09805100 | -0.38325200 |
| C | 3.91495000  | -1.17990300 | -0.83050100 |
| C | 1.35457100  | 1.38593500  | -0.37427600 |
| H | 5.21176900  | 1.99509400  | 1.08570600  |
| H | 6.72152700  | 0.07677500  | 0.63747100  |
| H | 5.91070300  | -1.92054400 | -0.57004800 |
| H | 3.57469600  | -2.05765100 | -1.37402400 |
| N | 2.48413700  | 1.90845600  | 0.22448700  |
| C | 0.08216000  | 2.15456000  | -0.39092500 |
| H | -0.21245400 | 2.45864600  | 0.62122100  |
| H | 0.17663500  | 3.06639100  | -0.99287100 |
| H | -0.73180800 | 1.55753200  | -0.80852900 |
| C | 1.65958800  | 0.14302800  | -0.89127300 |
| C | 0.42933700  | -1.04077000 | 1.57277700  |
| C | 0.72041700  | -0.80968200 | -1.54456000 |
| C | 0.34334300  | -1.97934300 | -0.60859900 |
| H | 1.17409900  | -1.24787700 | -2.44186500 |
| H | -0.20265900 | -0.31131000 | -1.85219200 |

|            |             |             |             |             |             |             |             |
|------------|-------------|-------------|-------------|-------------|-------------|-------------|-------------|
| H          | 1.23416500  | -2.55879100 | -0.34226400 | O           | -2.23933800 | 0.88926100  | -0.99162600 |
| H          | -0.37431500 | -2.63932800 | -1.10190800 | H           | -0.75867900 | 0.83416200  | -1.24925400 |
| N          | -0.27557300 | -1.46478600 | 0.59560400  | C           | -2.56103500 | 0.05740900  | -0.10008800 |
| H          | -1.43783400 | -1.26109200 | 0.59393700  | O           | -1.85872100 | -0.78365900 | 0.47999700  |
| O          | -2.71983300 | -0.98701900 | 0.67764300  | C           | -4.06999500 | 0.08513200  | 0.27005900  |
| H          | 2.54166700  | 2.83214400  | 0.62016400  | F           | -4.31415900 | -0.47359800 | 1.46433900  |
| C          | -3.11067000 | -0.24953400 | -0.28735000 | F           | -4.56549500 | 1.33214900  | 0.30385400  |
| O          | -2.47552600 | 0.13531600  | -1.26396200 | F           | -4.78118000 | -0.60633000 | -0.64780300 |
| C          | -4.58044300 | 0.21646100  | -0.12303000 | C           | 0.81836900  | -0.30199900 | 2.04002500  |
| F          | -4.67681400 | 1.07559100  | 0.91459700  | H           | 1.67594400  | 0.28110000  | 2.38592600  |
| F          | -5.03733600 | 0.84560800  | -1.20870000 | H           | 0.11525400  | 0.33333600  | 1.49778200  |
| F          | -5.40345100 | -0.81411800 | 0.12947700  | H           | 0.26180400  | -0.69802200 | 2.89869600  |
| H          | 1.51246500  | -1.18634900 | 1.54091800  | H           | 0.40010300  | -1.98049800 | 0.70572500  |
| C          | -0.16666300 | -0.36629900 | 2.75037800  | <b>Int2</b> |             |             |             |
| H          | -1.25047600 | -0.27366500 | 2.65923400  | C           | 2.21050600  | 0.76792900  | -0.17309000 |
| H          | 0.08339500  | -0.91887100 | 3.66279000  | C           | 0.99251300  | 1.36299600  | -0.52682300 |
| H          | 0.28296100  | 0.62819000  | 2.85363800  | C           | 0.75877500  | 2.72138500  | -0.37046300 |
| <b>TS1</b> |             |             |             | C           | 1.79581400  | 3.49712700  | 0.15136200  |
| C          | 2.40524900  | 0.64094900  | -0.36726600 | C           | 3.02208500  | 2.92192700  | 0.48929300  |
| C          | 1.27203600  | 1.43654500  | -0.64578900 | C           | 3.24201600  | 1.54954200  | 0.32583100  |
| C          | 1.21583900  | 2.78755000  | -0.31844400 | H           | -0.19430000 | 3.16043100  | -0.64894500 |
| C          | 2.33669000  | 3.34284500  | 0.29200900  | H           | 1.64963300  | 4.56442300  | 0.28738600  |
| C          | 3.47674400  | 2.57113400  | 0.56438700  | H           | 3.81783400  | 3.54873700  | 0.88052700  |
| C          | 3.52246400  | 1.21758500  | 0.24024600  | H           | 4.20954500  | 1.12281800  | 0.57643800  |
| C          | 0.76758500  | -0.61843100 | -1.34035900 | C           | 2.07701300  | -0.70085900 | -0.44697300 |
| H          | 0.32987700  | 3.37858900  | -0.52815200 | C           | 3.23993400  | -1.33003300 | -1.22613000 |
| H          | 2.33042700  | 4.39511600  | 0.55938200  | C           | 4.22470000  | -1.81120600 | -0.12406400 |
| H          | 4.33731100  | 3.04062600  | 1.03163900  | H           | 3.69124400  | -0.61877000 | -1.92260100 |
| H          | 4.41505300  | 0.63211800  | 0.44884600  | H           | 2.88047200  | -2.18262500 | -1.81142800 |
| N          | 0.30911000  | 0.63409900  | -1.24017100 | H           | 5.13990000  | -1.21132500 | -0.09992900 |
| C          | -0.05830600 | -1.70790800 | -1.91318500 | H           | 4.52599800  | -2.84668800 | -0.31803900 |
| H          | 0.53969500  | -2.60287600 | -2.09998500 | N           | 3.52558900  | -1.72038400 | 1.15754900  |
| H          | -0.87466300 | -1.94586200 | -1.21808800 | H           | 3.84414300  | -0.91910800 | 1.69214500  |
| H          | -0.51756000 | -1.38812600 | -2.85224100 | N           | 0.10369000  | 0.40342600  | -1.05369200 |
| C          | 2.05789900  | -0.71432500 | -0.74947500 | C           | 0.69962000  | -0.74763700 | -1.05683600 |
| C          | 1.21333600  | -1.43455100 | 1.17771000  | C           | 0.01285500  | -1.99270600 | -1.47963000 |
| C          | 3.02042800  | -1.85093600 | -0.87166200 | H           | -0.80620400 | -1.76664900 | -2.16484700 |
| C          | 2.79832800  | -2.88479700 | 0.27560600  | H           | 0.70188400  | -2.69413200 | -1.95728600 |
| H          | 4.04293500  | -1.46302600 | -0.81749700 | H           | -1.42149300 | 0.53161600  | -1.03326600 |
| H          | 2.92653600  | -2.35645100 | -1.83836400 | O           | -2.46140300 | 0.59656400  | -0.91766100 |
| H          | 3.70336200  | -3.44402900 | 0.52107900  | C           | -2.86472500 | -0.18932100 | 0.04005800  |
| H          | 2.02348600  | -3.60227700 | -0.01155700 | C           | -4.39397700 | -0.07261700 | 0.23965900  |
| N          | 2.32554500  | -2.15329500 | 1.42793500  | O           | -2.20328200 | -0.94440500 | 0.71851000  |
| H          | 3.04472100  | -1.65154300 | 1.93858700  | F           | -4.74964400 | 1.19690700  | 0.48863500  |

|            |             |             |             |             |             |             |             |
|------------|-------------|-------------|-------------|-------------|-------------|-------------|-------------|
| F          | -5.04208200 | -0.47396100 | -0.86685800 | C           | 0.85461500  | -1.00785600 | 1.94419000  |
| F          | -4.80603000 | -0.82656500 | 1.25693300  | H           | -0.15282500 | -0.73035100 | 1.62148000  |
| C          | 2.11523600  | -1.57648100 | 0.86934200  | H           | 0.75752700  | -1.70994900 | 2.77661800  |
| H          | 1.72861700  | -2.56473100 | 0.57851000  | H           | 1.36459700  | -0.10745400 | 2.30285400  |
| C          | 1.30741000  | -1.05477600 | 2.03682000  | H           | -1.29290900 | -1.40173500 | -0.74395800 |
| H          | 0.25097200  | -0.95557300 | 1.76859700  | <b>Int3</b> |             |             |             |
| H          | 1.38385100  | -1.74822300 | 2.87863400  | C           | 2.24478800  | 0.65120600  | -0.09459500 |
| H          | 1.67012300  | -0.07332100 | 2.36030700  | C           | 1.27934000  | 1.51154000  | -0.63274200 |
| H          | -0.41855100 | -2.48449100 | -0.59850700 | C           | 1.31988800  | 2.88513800  | -0.43852700 |
| <b>TS2</b> |             |             |             | C           | 2.37808300  | 3.39919100  | 0.31540400  |
| C          | 2.28556800  | 0.64035600  | -0.12286500 | C           | 3.36275600  | 2.56370500  | 0.83905800  |
| C          | 1.28277000  | 1.50921200  | -0.56471300 | C           | 3.30032100  | 1.18002200  | 0.63137500  |
| C          | 1.33361000  | 2.87928200  | -0.36667300 | H           | 0.56227500  | 3.53821300  | -0.86086500 |
| C          | 2.45280000  | 3.38480300  | 0.29949900  | H           | 2.43645600  | 4.47028000  | 0.48489400  |
| C          | 3.47680400  | 2.54117200  | 0.72854200  | H           | 4.18439000  | 2.98673600  | 1.40840100  |
| C          | 3.40097000  | 1.15957700  | 0.51668500  | H           | 4.08077700  | 0.53961900  | 1.03253200  |
| H          | 0.53978400  | 3.53210100  | -0.71553900 | C           | 1.87728800  | -0.76809400 | -0.45299100 |
| H          | 2.52852100  | 4.45348100  | 0.47521800  | C           | 3.01619900  | -1.56923300 | -1.10208200 |
| H          | 4.34383300  | 2.96028200  | 1.22952500  | C           | 3.76692800  | -2.20971600 | 0.09051300  |
| H          | 4.21347900  | 0.51705600  | 0.84380200  | H           | 3.65741800  | -0.93666600 | -1.72162600 |
| C          | 1.87244100  | -0.76680800 | -0.46418400 | H           | 2.58848400  | -2.34150500 | -1.74923000 |
| C          | 2.94497200  | -1.60483700 | -1.17366800 | H           | 4.72549500  | -1.71528700 | 0.28182900  |
| C          | 3.72918000  | -2.28129800 | -0.01784400 | H           | 3.98806500  | -3.26203800 | -0.12135100 |
| H          | 3.57878400  | -0.99119300 | -1.81913400 | N           | 2.89374300  | -2.09452200 | 1.26209000  |
| H          | 2.45996400  | -2.35779600 | -1.80278200 | H           | 3.26084300  | -1.42407000 | 1.92791900  |
| H          | 4.72758400  | -1.84986700 | 0.10743600  | N           | 0.36702600  | 0.76548500  | -1.37065900 |
| H          | 3.86597900  | -3.34717700 | -0.23162700 | C           | 0.64464400  | -0.57464300 | -1.32146400 |
| N          | 2.94263800  | -2.10279900 | 1.20267800  | C           | -0.10608700 | -1.55052200 | -1.89707800 |
| H          | 3.36707000  | -1.42003600 | 1.82058600  | H           | -0.88222500 | -1.30212900 | -2.61537100 |
| N          | 0.30382300  | 0.75947600  | -1.22907900 | H           | 0.22057100  | -2.58292600 | -1.84943200 |
| C          | 0.59007700  | -0.54743200 | -1.22433300 | H           | -0.52637000 | 1.11091800  | -1.69689800 |
| C          | -0.29761600 | -1.52711600 | -1.68828700 | O           | -2.56548600 | 0.70353700  | -1.24618400 |
| H          | -0.92254000 | -1.24412700 | -2.53528400 | C           | -2.90168200 | -0.10131600 | -0.40820800 |
| H          | 0.08200000  | -2.54459300 | -1.73386200 | C           | -4.18973400 | 0.08894200  | 0.42383100  |
| H          | -0.65712100 | 1.06890500  | -1.42052600 | O           | -2.28996900 | -1.20551200 | -0.06114800 |
| O          | -2.44677800 | 0.83646200  | -1.04837400 | F           | -4.80697700 | 1.21752400  | 0.08851700  |
| C          | -2.84113100 | -0.06431100 | -0.31036000 | F           | -5.03304700 | -0.93249800 | 0.22256000  |
| C          | -4.22577700 | 0.08705100  | 0.36800400  | F           | -3.89584400 | 0.13877100  | 1.73103500  |
| O          | -2.26977800 | -1.16729800 | -0.01042600 | C           | 1.58822500  | -1.66216900 | 0.80352700  |
| F          | -4.72964000 | 1.31129100  | 0.20281100  | H           | 1.04545200  | -2.54018500 | 0.42126100  |
| F          | -5.09540300 | -0.79291600 | -0.15770500 | C           | 0.76842500  | -1.02493300 | 1.90502300  |
| F          | -4.14588100 | -0.15101600 | 1.68652600  | H           | -0.22085500 | -0.73400600 | 1.54172500  |
| C          | 1.62193400  | -1.66056000 | 0.81580100  | H           | 0.62951300  | -1.73588700 | 2.72419900  |
| H          | 1.05452500  | -2.53123000 | 0.45696000  | H           | 1.26221200  | -0.12949000 | 2.29737700  |

|               |             |             |               |             |             |
|---------------|-------------|-------------|---------------|-------------|-------------|
| H -1.46772400 | -1.35139700 | -0.63199100 | H -0.24004100 | 0.30907800  | 1.18637200  |
| <b>Int4</b>   |             |             | <b>TS3</b>    |             |             |
| C -2.69738000 | -0.19241900 | -0.24457300 | C -2.66440600 | -0.34171200 | -0.24859300 |
| C -2.16003300 | -1.48218700 | -0.40911000 | C -1.95999200 | -1.53829300 | -0.47499700 |
| C -2.89908600 | -2.60975700 | -0.06279400 | C -2.53750900 | -2.77492300 | -0.20195800 |
| C -4.19877800 | -2.41965600 | 0.40987300  | C -3.85221600 | -2.78763800 | 0.26382000  |
| C -4.75545700 | -1.14549500 | 0.53222200  | C -4.57447300 | -1.60681100 | 0.45273000  |
| C -3.99117700 | -0.01702700 | 0.21400500  | C -3.97168600 | -0.36895600 | 0.20778300  |
| H -2.48127700 | -3.60514700 | -0.17415000 | H -1.98539600 | -3.69563300 | -0.36009700 |
| H -4.79489200 | -3.28869500 | 0.67383000  | H -4.32795600 | -3.74164800 | 0.47230100  |
| H -5.77666500 | -1.02936600 | 0.88085000  | H -5.60303900 | -1.65007300 | 0.79641600  |
| H -4.41138500 | 0.97883900  | 0.33510200  | H -4.52441100 | 0.55182000  | 0.37784200  |
| C -1.57867400 | 0.78201300  | -0.50398600 | C -1.68426400 | 0.77731500  | -0.44814200 |
| C -1.84854600 | 2.16137300  | -1.11316700 | C -2.09993300 | 2.15498200  | -0.97415900 |
| C -0.73281400 | 3.07794200  | -0.56445600 | C -1.12289600 | 3.15651600  | -0.30116600 |
| H -2.83112800 | 2.53129400  | -0.80884300 | H -3.13292100 | 2.37974300  | -0.69585600 |
| H -1.82861600 | 2.11520300  | -2.20431000 | H -2.03119600 | 2.19533000  | -2.06425500 |
| H -1.12586200 | 3.93595200  | -0.01183800 | H -1.64039400 | 3.85979400  | 0.35566200  |
| H -0.06343200 | 3.44406400  | -1.34269000 | H -0.53661600 | 3.73139600  | -1.01664700 |
| N 0.01858100  | 2.21424800  | 0.36572800  | N -0.24030500 | 2.30140300  | 0.50653100  |
| N -0.90171800 | -1.41164500 | -0.97875400 | N -0.71914600 | -1.26442200 | -1.01992400 |
| C -0.58581300 | -0.08985300 | -1.26878000 | C -0.56501600 | 0.08499800  | -1.20933000 |
| C 0.43339900  | 0.31591500  | -2.04064900 | C 0.46107700  | 0.69108600  | -1.85560300 |
| H 1.10433200  | -0.40125200 | -2.49971400 | H 1.26426300  | 0.10652900  | -2.29026100 |
| H 0.60600300  | 1.36726000  | -2.24130900 | H 0.39912900  | 1.73854600  | -2.12430600 |
| C -0.86805800 | 1.13913900  | 0.84045200  | C -1.01759800 | 1.14271100  | 0.93821500  |
| C 1.29350600  | 2.16091500  | 0.52443900  | C 1.03983000  | 2.14084600  | 0.30057900  |
| H 1.65697500  | 1.29548300  | 1.09674200  | H 1.48112300  | 1.25981800  | 0.78178600  |
| C 2.26817100  | 3.10969600  | -0.04310900 | C 1.94454800  | 3.13491700  | -0.31486900 |
| H 1.83176900  | 3.96932400  | -0.55123900 | H 1.46002300  | 3.84888300  | -0.98221300 |
| H 2.92530600  | 3.45626100  | 0.76172600  | H 2.42626000  | 3.69594600  | 0.49757500  |
| H 2.91275100  | 2.54870400  | -0.73037900 | H 2.73947100  | 2.60659800  | -0.84491000 |
| H -0.12789000 | -2.05763800 | -0.76609100 | H 0.12687800  | -1.86334300 | -0.93433200 |
| O 1.59209600  | -2.33025000 | -0.22849300 | O 1.78356400  | -2.15737200 | -0.54318000 |
| C 2.08266800  | -1.40169700 | 0.43145400  | C 2.18600600  | -1.32564300 | 0.29254500  |
| C 3.59150800  | -1.10327700 | 0.17165200  | C 3.70752100  | -0.99506300 | 0.24451800  |
| O 1.56878100  | -0.63769100 | 1.28083000  | O 1.56059400  | -0.66277500 | 1.14667900  |
| F 4.10707800  | -1.76732500 | -0.86600900 | F 4.39888900  | -1.72186200 | -0.63674700 |
| F 4.34702100  | -1.38255800 | 1.24926800  | F 4.29654700  | -1.14128300 | 1.44309700  |
| F 3.77481100  | 0.22575600  | -0.09173600 | F 3.87339700  | 0.31371400  | -0.11276700 |
| C -1.77311200 | 1.64638800  | 1.94847200  | C -1.99414900 | 1.48711800  | 2.04525600  |
| H -2.42100600 | 2.47008800  | 1.63005000  | H -2.73682000 | 2.23360400  | 1.74610200  |
| H -2.41136600 | 0.82761500  | 2.28594500  | H -2.52842700 | 0.58337200  | 2.34402100  |
| H -1.17077300 | 1.98332500  | 2.79706300  | H -1.44860900 | 1.86600500  | 2.91395500  |

|             |             |             |             |            |             |             |             |
|-------------|-------------|-------------|-------------|------------|-------------|-------------|-------------|
| H           | -0.32704000 | 0.35180700  | 1.25096000  | H          | 1.86811700  | -0.71248000 | 1.79065500  |
| <b>Int5</b> |             |             |             | <b>TS4</b> |             |             |             |
| C           | 2.12589900  | 1.50852200  | -0.15140200 | C          | -2.59983500 | -0.85741600 | -0.30439200 |
| C           | 0.76143500  | 1.83692000  | -0.20564800 | C          | -1.51211900 | -1.71045900 | -0.62249200 |
| C           | 0.31181800  | 3.14534800  | -0.09451900 | C          | -1.57425900 | -3.08928500 | -0.42688600 |
| C           | 1.27361400  | 4.14413200  | 0.06448300  | C          | -2.75865700 | -3.61054500 | 0.07829800  |
| C           | 2.63506500  | 3.83346300  | 0.10577900  | C          | -3.85386700 | -2.78213500 | 0.38069900  |
| C           | 3.07374800  | 2.51024500  | -0.00138800 | C          | -3.78621400 | -1.40747200 | 0.19426600  |
| H           | -0.74797000 | 3.37761700  | -0.13503400 | H          | -0.72596100 | -3.72504000 | -0.65992600 |
| H           | 0.95872500  | 5.17971500  | 0.15138700  | H          | -2.84183900 | -4.68090300 | 0.24085000  |
| H           | 3.36256200  | 4.63135300  | 0.22109300  | H          | -4.76648400 | -3.22751200 | 0.76536100  |
| H           | 4.13534300  | 2.28053300  | 0.02786600  | H          | -4.63907700 | -0.77627800 | 0.43044100  |
| C           | 2.21747800  | 0.02335100  | -0.26994400 | C          | -2.13992300 | 0.48598100  | -0.54847600 |
| C           | 3.12261800  | -0.61884400 | -1.33204900 | C          | -2.88861700 | 1.77700100  | -0.58417900 |
| C           | 3.33342000  | -2.06393800 | -0.79657100 | C          | -2.14460900 | 2.89661300  | 0.24002000  |
| H           | 4.06583000  | -0.06892000 | -1.40451000 | H          | -3.90250200 | 1.63798700  | -0.19685500 |
| H           | 2.65906600  | -0.59657100 | -2.32307700 | H          | -2.99377400 | 2.12187900  | -1.61947400 |
| H           | 4.39641800  | -2.26227700 | -0.62951300 | H          | -2.74355800 | 3.19653200  | 1.10198700  |
| H           | 2.97714500  | -2.82470600 | -1.49387700 | H          | -1.97296800 | 3.79214800  | -0.35589800 |
| N           | 2.61386100  | -2.16615600 | 0.48231900  | N          | -0.86864800 | 2.37425800  | 0.69963500  |
| N           | -0.03112700 | 0.68042700  | -0.39317200 | N          | -0.46748000 | -0.94329000 | -1.10262900 |
| C           | 0.76676300  | -0.33591800 | -0.47099400 | C          | -0.82983100 | 0.34974800  | -1.07012900 |
| C           | 0.39426700  | -1.75780700 | -0.63903800 | C          | 0.01966800  | 1.50029200  | -1.44988200 |
| H           | -0.67912200 | -1.90460300 | -0.49337400 | H          | 0.98338400  | 1.16796000  | -1.84272300 |
| H           | 0.64598300  | -2.05908700 | -1.66728900 | H          | -0.48966800 | 2.07129500  | -2.23854200 |
| C           | 2.62823600  | -0.80710900 | 1.00701600  | C          | -0.97282100 | 1.16908300  | 1.27947500  |
| C           | 1.22721500  | -2.63128600 | 0.34248600  | C          | 0.26869100  | 2.44728400  | -0.22820100 |
| H           | 0.78248300  | -2.51349200 | 1.33812600  | H          | 1.11210200  | 2.02307900  | 0.32209500  |
| C           | 1.14627700  | -4.10210600 | -0.02422700 | C          | 0.60970300  | 3.85890500  | -0.65913600 |
| H           | 1.54489800  | -4.29979300 | -1.02495600 | H          | -0.15950800 | 4.30716300  | -1.29678500 |
| H           | 1.70953200  | -4.70255100 | 0.69473200  | H          | 0.77010300  | 4.50497200  | 0.20811000  |
| H           | 0.10275800  | -4.43084400 | -0.01632500 | H          | 1.53682800  | 3.83578900  | -1.23875900 |
| H           | -1.55774900 | 0.69749200  | -0.37602700 | H          | 0.56381600  | -1.22619500 | -1.12915600 |
| O           | -2.60202100 | 0.82157500  | -0.34659400 | O          | 2.10687500  | -1.37651500 | -0.95912200 |
| C           | -3.21496800 | -0.25539100 | 0.04634200  | C          | 2.50568800  | -0.71846000 | 0.03270700  |
| C           | -4.74229900 | -0.02122000 | 0.12224600  | C          | 4.04231500  | -0.73153100 | 0.26437100  |
| O           | -2.73680800 | -1.33168800 | 0.33281000  | O          | 1.85946400  | -0.01595000 | 0.82978600  |
| F           | -5.02763100 | 0.96203600  | 0.99155200  | F          | 4.66851800  | -1.72687400 | -0.37380800 |
| F           | -5.38063000 | -1.12123800 | 0.51734000  | F          | 4.35261100  | -0.83002300 | 1.56713700  |
| F           | -5.22882600 | 0.33531100  | -1.07758300 | F          | 4.57423500  | 0.43043100  | -0.18587500 |
| C           | 3.97354900  | -0.40439800 | 1.58455600  | C          | -2.00132000 | 0.83062900  | 2.29789400  |
| H           | 4.77273900  | -0.42780400 | 0.83770300  | H          | -2.98184600 | 1.27345500  | 2.11813400  |
| H           | 3.92288200  | 0.60636300  | 1.99773700  | H          | -2.11314700 | -0.25393200 | 2.35565800  |
| H           | 4.24083700  | -1.09771700 | 2.38638000  | H          | -1.63239400 | 1.17863900  | 3.27241900  |

|             |             |             |             |               |             |             |             |
|-------------|-------------|-------------|-------------|---------------|-------------|-------------|-------------|
| H           | -0.04355200 | 0.59069900  | 1.30788100  | H             | 0.38881900  | 0.73646000  | 1.41306200  |
| <b>Int6</b> |             |             |             | <b>4d-TFA</b> |             |             |             |
| C           | -2.73893500 | -0.78424000 | -0.40162300 | C             | -3.66970100 | -0.65625400 | 0.08464700  |
| C           | -1.64384900 | -1.67926700 | -0.59034000 | C             | -4.33625400 | 0.58807200  | 0.21419500  |
| C           | -1.75638200 | -3.04694600 | -0.32351900 | C             | -5.72735400 | 0.69652700  | 0.19836400  |
| C           | -2.97823100 | -3.51464200 | 0.13597100  | C             | -6.45681200 | -0.47463600 | 0.05221200  |
| C           | -4.07240500 | -2.64637400 | 0.32584400  | C             | -5.81720500 | -1.72188300 | -0.07599400 |
| C           | -3.96541600 | -1.29022700 | 0.06071000  | C             | -4.43473700 | -1.82324800 | -0.06095300 |
| H           | -0.91188900 | -3.71335800 | -0.47002500 | H             | -6.22310700 | 1.65802600  | 0.29808700  |
| H           | -3.09606900 | -4.57222300 | 0.35245700  | H             | -7.54150000 | -0.42781500 | 0.03737100  |
| H           | -5.01507000 | -3.05140600 | 0.68214500  | H             | -6.42024100 | -2.61800000 | -0.18691800 |
| H           | -4.81915600 | -0.63224400 | 0.20417500  | H             | -3.95506300 | -2.79357200 | -0.15727800 |
| C           | -2.24723200 | 0.51768300  | -0.72646800 | C             | -2.25925700 | -0.38829600 | 0.13730200  |
| C           | -2.84671200 | 1.87291200  | -0.59897500 | C             | -1.15400600 | -1.39104300 | 0.06083500  |
| C           | -2.16922700 | 2.71962900  | 0.53802300  | C             | -0.03302200 | -1.02048000 | -0.89684600 |
| H           | -3.91926000 | 1.82369700  | -0.38996200 | H             | -1.56173400 | -2.34985900 | -0.27689600 |
| H           | -2.73416800 | 2.42660200  | -1.53956600 | H             | -0.72287600 | -1.58654200 | 1.05403200  |
| H           | -2.73497900 | 2.63879100  | 1.46513000  | H             | -0.42732700 | -0.80310000 | -1.89409600 |
| H           | -2.12622600 | 3.77579200  | 0.27095400  | H             | 0.67804300  | -1.84780100 | -0.98473300 |
| N           | -0.81839100 | 2.23930700  | 0.78369900  | N             | 0.77242700  | 0.14657100  | -0.47208200 |
| N           | -0.55900300 | -0.95764700 | -1.02175800 | N             | -3.36629100 | 1.55317900  | 0.33803900  |
| C           | -0.91474700 | 0.35525800  | -1.08888800 | C             | -2.11702500 | 0.97004100  | 0.29308000  |
| C           | -0.00533600 | 1.47672800  | -1.44122000 | C             | -0.87889700 | 1.78883300  | 0.43312900  |
| H           | 0.97316500  | 1.10163500  | -1.74918200 | H             | -1.13512900 | 2.85206700  | 0.36191400  |
| H           | -0.43554000 | 2.02799200  | -2.28771100 | H             | -0.43704900 | 1.65281400  | 1.43182200  |
| C           | -0.61423100 | 1.17726600  | 1.51042300  | C             | 0.20144500  | 1.51168000  | -0.61281800 |
| C           | 0.21004700  | 2.48072800  | -0.25523000 | H             | -0.24535200 | 1.55446300  | -1.61288000 |
| H           | 1.15486200  | 2.20774300  | 0.21929700  | H             | -3.53667000 | 2.53962800  | 0.43965900  |
| C           | 0.26069900  | 3.92309100  | -0.71354300 | H             | 1.13835500  | 0.00178300  | 0.48864800  |
| H           | -0.62990100 | 4.21572800  | -1.27954000 | H             | 1.75861600  | 0.08126800  | -0.96508800 |
| H           | 0.39400100  | 4.61065600  | 0.12669000  | O             | 3.21759300  | -0.15260400 | -1.11424500 |
| H           | 1.11910600  | 4.04064000  | -1.38066300 | C             | 3.61368700  | -0.29466900 | 0.07948300  |
| H           | 0.44720800  | -1.25687400 | -1.01475200 | C             | 5.14892300  | -0.46113400 | 0.21408000  |
| O           | 2.08060300  | -1.40770300 | -0.83965900 | O             | 2.93872100  | -0.29468800 | 1.12148400  |
| C           | 2.60312700  | -0.65306100 | 0.00599200  | F             | 5.60645300  | -1.43024700 | -0.59616200 |
| C           | 4.14724300  | -0.76096100 | 0.15401400  | F             | 5.77070600  | 0.68431800  | -0.13178000 |
| O           | 2.08084500  | 0.21184300  | 0.74081000  | F             | 5.52537500  | -0.76353700 | 1.45987100  |
| F           | 4.67811600  | -1.78487600 | -0.52315000 | C             | 1.34170800  | 2.51563200  | -0.50602000 |
| F           | 4.50905400  | -0.90090800 | 1.44279200  | H             | 2.11386100  | 2.32104400  | -1.25429600 |
| F           | 4.73357100  | 0.36881200  | -0.30431200 | H             | 0.95957900  | 3.52879600  | -0.65610700 |
| C           | -1.55014400 | 0.53543700  | 2.44795400  | H             | 1.81234100  | 2.46722300  | 0.48160900  |
| H           | -2.50269700 | 1.04254200  | 2.59261500  | <b>Int7</b>   |             |             |             |
| H           | -1.75461900 | -0.47259300 | 2.05957700  | C             | -3.01321700 | -1.36174900 | 0.12580800  |
| H           | -1.04369200 | 0.40032700  | 3.40979900  | C             | -3.52078300 | -0.33240700 | 0.95866300  |

|   |             |             |             |     |             |             |             |
|---|-------------|-------------|-------------|-----|-------------|-------------|-------------|
| C | -4.85032400 | 0.08388900  | 0.90380700  | TS5 |             |             |             |
| C | -5.68046000 | -0.54511900 | -0.01649100 | C   | -2.25696600 | -0.02761900 | 1.14885000  |
| C | -5.19850100 | -1.56423000 | -0.85663400 | C   | -0.97050500 | 0.41663000  | 1.50806700  |
| C | -3.87456400 | -1.97812600 | -0.79296300 | C   | -0.72589200 | 1.70261200  | 1.96908000  |
| C | -1.32270600 | -0.58264400 | 1.41944400  | C   | -1.82582500 | 2.54962300  | 2.09318500  |
| H | -5.22699000 | 0.86859900  | 1.55411000  | C   | -3.11766900 | 2.11827400  | 1.76638900  |
| H | -6.72175500 | -0.24506200 | -0.08541400 | C   | -3.34615900 | 0.82886600  | 1.28501200  |
| H | -5.87612200 | -2.03588800 | -1.56190900 | C   | -0.70829000 | -1.68599000 | 0.82344400  |
| H | -3.51539100 | -2.77492700 | -1.43927000 | H   | 0.27964200  | 2.02716700  | 2.21665200  |
| N | -2.47315700 | 0.10864600  | 1.73332800  | H   | -1.67876700 | 3.56199500  | 2.45681500  |
| C | -0.03948700 | -0.26714300 | 2.09750700  | H   | -3.95382500 | 2.79989000  | 1.89147900  |
| H | 0.21779200  | 0.79223700  | 1.97293800  | H   | -4.35452000 | 0.50412600  | 1.03762900  |
| H | -0.09748800 | -0.47287900 | 3.17282700  | N   | -0.07026900 | -0.62586400 | 1.29819100  |
| H | 0.77837700  | -0.86133700 | 1.68266200  | C   | -0.00608400 | -2.95238600 | 0.51009800  |
| C | -1.61553600 | -1.51248700 | 0.43706600  | H   | -0.63593900 | -3.61587100 | -0.08729000 |
| C | -0.59381400 | 0.51515200  | -1.27385200 | H   | 0.93264600  | -2.73743400 | -0.01798600 |
| C | -0.64255800 | -2.38103900 | -0.27672700 | H   | 0.25098800  | -3.47667200 | 1.43752100  |
| C | -0.25123300 | -1.79064800 | -1.65836700 | C   | -2.09011700 | -1.36068200 | 0.58521400  |
| H | -1.06623300 | -3.37541500 | -0.46051100 | C   | -1.88419400 | -0.93131300 | -1.42626100 |
| H | 0.27652000  | -2.51117400 | 0.30011400  | C   | -3.22014400 | -2.33359800 | 0.41358400  |
| H | -1.12012500 | -1.77648200 | -2.32531100 | C   | -3.65461900 | -2.38108100 | -1.08661200 |
| H | 0.53918100  | -2.39114700 | -2.11331300 | H   | -4.06166100 | -2.01179800 | 1.03512900  |
| N | 0.24379000  | -0.44225600 | -1.48685800 | H   | -2.94099000 | -3.33541900 | 0.75411700  |
| H | 1.33931600  | -0.34700000 | -1.30102700 | H   | -4.73295200 | -2.49718500 | -1.21246000 |
| O | 2.74762200  | -0.25531100 | -1.07314000 | H   | -3.17016300 | -3.22819400 | -1.58391300 |
| H | -2.52537400 | 0.83680400  | 2.42625800  | N   | -3.20171600 | -1.16718800 | -1.72924800 |
| C | 3.14165800  | -1.00150700 | -0.12337300 | H   | -3.80831300 | -0.37007100 | -1.57452900 |
| O | 2.50392900  | -1.82911500 | 0.52546300  | O   | 2.44925000  | -0.26390100 | 1.32123900  |
| C | 4.63048700  | -0.76577700 | 0.24535000  | H   | 1.03059600  | -0.52208700 | 1.35058800  |
| F | 4.78958900  | 0.47942400  | 0.74856000  | C   | 3.00487200  | -0.68328900 | 0.26729300  |
| F | 5.07638200  | -1.62671600 | 1.16437900  | O   | 2.55205700  | -1.41562500 | -0.61974200 |
| F | 5.43051800  | -0.86774900 | -0.82979900 | C   | 4.43934900  | -0.12772700 | 0.05539900  |
| H | -1.64944900 | 0.29965000  | -1.44490300 | F   | 5.16537900  | -0.88202000 | -0.77769600 |
| C | -0.27862000 | 1.86248500  | -0.83928800 | F   | 4.36329200  | 1.11169300  | -0.49091600 |
| C | -1.36952400 | 2.71134400  | -0.59188900 | F   | 5.12604900  | -0.01450100 | 1.20099400  |
| C | 1.03005700  | 2.32542000  | -0.61950700 | H   | -1.24423400 | -1.77910500 | -1.66817600 |
| C | -1.16148500 | 4.00514400  | -0.13024100 | C   | -1.25116300 | 0.37199500  | -1.59218900 |
| H | -2.37967800 | 2.34347200  | -0.75544900 | C   | 0.15005700  | 0.41924100  | -1.61158200 |
| C | 1.22754500  | 3.62124500  | -0.16186600 | C   | -1.97905600 | 1.57137500  | -1.63704300 |
| H | 1.88224500  | 1.67532300  | -0.80151900 | C   | 0.81164700  | 1.64196700  | -1.65605500 |
| C | 0.13869300  | 4.46037500  | 0.08361200  | H   | 0.73748500  | -0.49486000 | -1.56190900 |
| H | -2.00837400 | 4.65755800  | 0.05919900  | C   | -1.31535000 | 2.78781500  | -1.68836700 |
| H | 2.23879700  | 3.97838600  | 0.00654100  | H   | -3.06472200 | 1.56738500  | -1.61578100 |
| H | 0.30574200  | 5.47224800  | 0.44148800  | C   | 0.08087000  | 2.82599200  | -1.68805500 |

|             |             |             |             |            |             |             |             |
|-------------|-------------|-------------|-------------|------------|-------------|-------------|-------------|
| H           | 1.89699200  | 1.66171900  | -1.65153000 | C          | -1.16488600 | 3.11142500  | -1.41522500 |
| H           | -1.88567600 | 3.71127200  | -1.71525800 | H          | -3.02372800 | 2.12038900  | -1.06221700 |
| H           | 0.59580300  | 3.78193400  | -1.71381900 | C          | 0.18440700  | 2.97941400  | -1.73507400 |
| <b>Int8</b> |             |             |             | H          | 1.76130400  | 1.59050300  | -2.22863300 |
| C           | -2.16025200 | -0.21639000 | 1.13235500  | H          | -1.58790000 | 4.09457900  | -1.23040300 |
| C           | -0.86111200 | -0.09102300 | 1.64033000  | H          | 0.81914400  | 3.85831000  | -1.79935000 |
| C           | -0.53315400 | 0.84653500  | 2.60786800  | <b>TS6</b> |             |             |             |
| C           | -1.56033800 | 1.66423300  | 3.08367600  | C          | -2.38677400 | -0.38628500 | 0.84101300  |
| C           | -2.86578100 | 1.53007000  | 2.60788000  | C          | -1.36654200 | -0.25228000 | 1.78749700  |
| C           | -3.17824700 | 0.58556400  | 1.62377200  | C          | -1.48780700 | 0.54731000  | 2.91174200  |
| H           | 0.48306800  | 0.93600600  | 2.97902700  | C          | -2.70126600 | 1.21725200  | 3.08823900  |
| H           | -1.34221300 | 2.40834900  | 3.84373900  | C          | -3.74739700 | 1.06631200  | 2.17850900  |
| H           | -3.64972900 | 2.16536200  | 3.00929700  | C          | -3.59587100 | 0.25920900  | 1.04522800  |
| H           | -4.20289900 | 0.48339500  | 1.27460100  | H          | -0.67821300 | 0.64485900  | 3.62790700  |
| C           | -2.10110800 | -1.24633600 | 0.04786600  | H          | -2.83450000 | 1.85274000  | 3.95841900  |
| C           | -3.24037400 | -2.26632000 | -0.01341900 | H          | -4.68906600 | 1.57773200  | 2.35236200  |
| C           | -4.28052400 | -1.63942600 | -0.98672000 | H          | -4.42055200 | 0.14359000  | 0.34735100  |
| H           | -3.65118500 | -2.46009900 | 0.98082900  | C          | -1.87607700 | -1.25245900 | -0.27606100 |
| H           | -2.87343000 | -3.21917500 | -0.40883600 | C          | -2.84547100 | -2.32892300 | -0.77042900 |
| H           | -5.22684100 | -1.40291200 | -0.49182200 | C          | -3.68668800 | -1.62002500 | -1.86322000 |
| H           | -4.50739400 | -2.34411900 | -1.79440800 | H          | -3.45572400 | -2.72858000 | 0.04364500  |
| N           | -3.69236500 | -0.42447600 | -1.54679400 | H          | -2.27925000 | -3.16097800 | -1.20014500 |
| H           | -4.02968400 | 0.39295100  | -1.05220700 | H          | -4.70408300 | -1.40423500 | -1.52066700 |
| N           | -0.00078300 | -1.03862700 | 1.04579700  | H          | -3.77658100 | -2.26524700 | -2.74432700 |
| C           | -0.68828000 | -1.74134600 | 0.20050300  | N          | -2.99440800 | -0.37871500 | -2.20904500 |
| C           | -0.10435200 | -2.86456200 | -0.57393300 | H          | -3.49968500 | 0.43782600  | -1.88999700 |
| H           | 0.96824200  | -2.71465000 | -0.71586300 | N          | -0.29864300 | -1.07171700 | 1.40615100  |
| H           | -0.26297700 | -3.80661500 | -0.03459300 | C          | -0.54758900 | -1.71967500 | 0.26247200  |
| H           | 1.51209400  | -0.87813400 | 1.12384800  | C          | 0.37748200  | -2.57723900 | -0.35007300 |
| O           | 2.52803200  | -0.61301000 | 1.19241400  | H          | 0.96090900  | -3.19399300 | 0.33485800  |
| C           | 3.12351400  | -0.69067700 | 0.04000200  | H          | 0.02693300  | -3.11319900 | -1.22869600 |
| C           | 4.55936200  | -0.12175200 | 0.11858000  | H          | 0.66000100  | -1.03177800 | 1.77417600  |
| O           | 2.68377000  | -1.11660200 | -1.00665100 | O          | 2.45167800  | -0.80950200 | 1.48332800  |
| F           | 4.51571300  | 1.20883100  | 0.31004200  | C          | 2.97293700  | -0.74347700 | 0.37341900  |
| F           | 5.24569400  | -0.66255800 | 1.13510800  | C          | 4.37586500  | -0.09768500 | 0.24832800  |
| F           | 5.23202900  | -0.35413200 | -1.00761300 | O          | 2.52527200  | -1.14352600 | -0.75473700 |
| C           | -2.26541500 | -0.54583000 | -1.38849700 | F          | 4.83171000  | 0.33495600  | 1.42386700  |
| H           | -1.90866300 | -1.28636800 | -2.11781700 | F          | 5.26174900  | -0.97921300 | -0.24171100 |
| H           | -0.58463700 | -2.96844100 | -1.55122700 | F          | 4.33721700  | 0.95399800  | -0.59029300 |
| C           | -1.45812700 | 0.71042800  | -1.55692000 | C          | -1.67297900 | -0.42987400 | -1.63104900 |
| C           | -0.10630400 | 0.59158400  | -1.89340000 | H          | -1.04393100 | -1.07754200 | -2.25713900 |
| C           | -1.97859700 | 1.98546600  | -1.32375300 | H          | 1.47375300  | -1.76444400 | -0.64044800 |
| C           | 0.71244900  | 1.71346700  | -1.97568600 | C          | -0.97168600 | 0.89320200  | -1.48912500 |
| H           | 0.32684500  | -0.38712900 | -2.08213900 | C          | 0.38940500  | 0.96599100  | -1.79344500 |

|             |             |             |             |              |             |             |             |
|-------------|-------------|-------------|-------------|--------------|-------------|-------------|-------------|
| C           | -1.61298300 | 2.04360500  | -1.01745000 | H            | 1.63788300  | -0.76423400 | -1.51415400 |
| C           | 1.10378400  | 2.14690000  | -1.60984300 | C            | -0.84568600 | 1.64830600  | -0.53016300 |
| H           | 0.90578200  | 0.08672100  | -2.16549300 | C            | 0.46740200  | 1.97697700  | -0.87504000 |
| C           | -0.90570700 | 3.22962500  | -0.84545600 | C            | -1.34257300 | 2.10104400  | 0.69786600  |
| H           | -2.66723000 | 2.02408300  | -0.75914200 | C            | 1.27725800  | 2.71296700  | -0.01368000 |
| C           | 0.45668000  | 3.28373300  | -1.13422300 | H            | 0.86261500  | 1.65401200  | -1.83403600 |
| H           | 2.16498100  | 2.17121500  | -1.83768200 | C            | -0.53969200 | 2.84376300  | 1.55829900  |
| H           | -1.42077200 | 4.11167400  | -0.47601900 | H            | -2.35564400 | 1.86187400  | 1.00407300  |
| H           | 1.00900900  | 4.20782500  | -0.99062500 | C            | 0.77524500  | 3.14668100  | 1.20991200  |
| <b>Int9</b> |             |             |             | H            | 2.29800400  | 2.94553100  | -0.30176900 |
| C           | -2.47723900 | -0.77857100 | 0.37883000  | H            | -0.94328800 | 3.18014300  | 2.50903100  |
| C           | -1.50279900 | -1.39930700 | 1.16990200  | H            | 1.40203400  | 3.72092800  | 1.88607400  |
| C           | -1.65797900 | -1.55978300 | 2.53970600  | <b>Int10</b> |             |             |             |
| C           | -2.84691200 | -1.10095300 | 3.11273400  | C            | 2.71698100  | 0.32329300  | -1.26816100 |
| C           | -3.84926300 | -0.52387400 | 2.33447000  | C            | 2.42674000  | 1.69803300  | -1.31743200 |
| C           | -3.66679800 | -0.36344600 | 0.95529300  | C            | 3.42494600  | 2.64325900  | -1.09678400 |
| H           | -0.88979600 | -2.03282200 | 3.14361200  | C            | 4.72245700  | 2.18092000  | -0.86719300 |
| H           | -2.99676300 | -1.21485100 | 4.18236400  | C            | 5.02401600  | 0.81806500  | -0.85533300 |
| H           | -4.77567800 | -0.19991900 | 2.79826300  | C            | 4.00613100  | -0.12376900 | -1.03955400 |
| H           | -4.45464600 | 0.08342300  | 0.35482100  | H            | 3.20067300  | 3.70494800  | -1.11783800 |
| C           | -1.95498600 | -0.68437200 | -1.03130600 | H            | 5.51716100  | 2.90382200  | -0.70440300 |
| C           | -2.97508600 | -1.06757200 | -2.10741900 | H            | 6.04380000  | 0.48823900  | -0.68446200 |
| C           | -3.73939000 | 0.24911500  | -2.39824300 | H            | 4.22514300  | -1.18670600 | -0.97522000 |
| H           | -3.63049100 | -1.87666100 | -1.77473200 | C            | 1.40094500  | -0.40287200 | -1.31514400 |
| H           | -2.44965500 | -1.41411200 | -3.00282700 | C            | 1.28852200  | -1.77787700 | -1.96848100 |
| H           | -4.74626700 | 0.24156300  | -1.96752100 | C            | 0.07406700  | -2.44611000 | -1.30142100 |
| H           | -3.85684800 | 0.38805400  | -3.47893800 | H            | 2.19637500  | -2.35605300 | -1.77490000 |
| N           | -2.95094800 | 1.34669600  | -1.82959800 | H            | 1.15507200  | -1.69571100 | -3.04962000 |
| H           | -3.40053700 | 1.75176800  | -1.01764900 | H            | 0.28448400  | -3.46618500 | -0.96823100 |
| N           | -0.46200100 | -1.82343900 | 0.35469800  | H            | -0.80613700 | -2.47569800 | -1.94789200 |
| C           | -0.67969400 | -1.50602100 | -0.96012500 | N            | -0.23280200 | -1.58295800 | -0.14499300 |
| C           | 0.14311100  | -1.83360300 | -1.99066600 | N            | 1.09468300  | 1.90293700  | -1.63197000 |
| H           | 0.92082700  | -2.58054200 | -1.85801700 | C            | 0.46748600  | 0.68055300  | -1.85104500 |
| H           | -0.13477400 | -1.58077100 | -3.00728000 | C            | -0.75716000 | 0.53019600  | -2.37680500 |
| H           | 0.44458700  | -2.13232400 | 0.68344300  | H            | -1.33942300 | 1.39635100  | -2.67038800 |
| O           | 2.45440400  | -1.68118100 | 0.55584300  | H            | -1.20231200 | -0.44573800 | -2.52645200 |
| C           | 2.99266600  | -0.87929100 | -0.17215900 | C            | 0.89363100  | -0.68516100 | 0.14700600  |
| C           | 4.39367000  | -0.31295000 | 0.15072100  | C            | -1.41143900 | -1.29069900 | 0.30918500  |
| O           | 2.54298000  | -0.38104900 | -1.29495000 | H            | -1.44740800 | -0.40505300 | 0.95208900  |
| F           | 4.83705600  | -0.78410300 | 1.31150600  | H            | 0.52192000  | 2.65828800  | -1.21984900 |
| F           | 5.26516900  | -0.65697600 | -0.80840300 | O            | -0.81599100 | 3.34261800  | -0.26080700 |
| F           | 4.35907300  | 1.02514000  | 0.22193500  | C            | -1.39033100 | 2.60204200  | 0.55326000  |
| C           | -1.65519600 | 0.80558700  | -1.47754300 | C            | -2.80539200 | 3.06674100  | 1.01249600  |
| H           | -1.06801400 | 0.69925700  | -2.40127300 | O            | -1.03572700 | 1.51652800  | 1.06693400  |

|            |             |             |             |              |             |             |             |
|------------|-------------|-------------|-------------|--------------|-------------|-------------|-------------|
| F          | -3.16439300 | 4.26362400  | 0.54298900  | N            | -0.04669900 | -1.72063000 | 0.03239800  |
| F          | -2.90992200 | 3.11035000  | 2.35315500  | N            | 0.69834800  | 1.78648800  | -1.54224700 |
| F          | -3.74805100 | 2.17912700  | 0.58004900  | C            | 0.24594900  | 0.50652200  | -1.67557700 |
| H          | 0.47942000  | 0.23859400  | 0.57174700  | C            | -1.03499100 | 0.13725900  | -1.95995300 |
| C          | 1.90912800  | -1.26927300 | 1.08981200  | H            | -1.79918300 | 0.89263200  | -2.10829500 |
| C          | 2.64629300  | -0.36314200 | 1.85846500  | H            | -1.25679800 | -0.86609000 | -2.29785300 |
| C          | 2.18422600  | -2.63339900 | 1.20784500  | C            | 1.01150400  | -0.74619600 | 0.25236100  |
| C          | 3.64887400  | -0.80913500 | 2.71203800  | C            | -1.27958900 | -1.24939600 | 0.16280400  |
| H          | 2.43425700  | 0.69918900  | 1.77383200  | H            | -1.36845100 | -0.31312700 | 0.72054600  |
| C          | 3.18496100  | -3.08228100 | 2.06766200  | H            | 0.03408300  | 2.53870400  | -1.23612200 |
| H          | 1.61703400  | -3.36643200 | 0.64244800  | O            | -1.22150700 | 3.26037800  | -0.42384300 |
| C          | 3.92402300  | -2.17109900 | 2.81737300  | C            | -1.58024800 | 2.57019200  | 0.55418200  |
| H          | 4.21497500  | -0.08983300 | 3.29601700  | C            | -2.97932800 | 2.93462200  | 1.13089400  |
| H          | 3.38371700  | -4.14682100 | 2.15180700  | O            | -1.02735200 | 1.59705200  | 1.10267900  |
| H          | 4.70485100  | -2.52152400 | 3.48583400  | F            | -3.34415000 | 4.19922600  | 0.90030900  |
| C          | -2.66355100 | -1.94031300 | -0.00273400 | F            | -3.06933200 | 2.72148800  | 2.45145800  |
| C          | -3.81109900 | -1.14750500 | 0.18129600  | F            | -3.91916500 | 2.13780200  | 0.54231900  |
| C          | -2.79993000 | -3.27082800 | -0.43678600 | H            | 0.57148400  | 0.14787300  | 0.70864500  |
| C          | -5.06590400 | -1.66101200 | -0.11686700 | C            | 2.16325100  | -1.21569400 | 1.09619500  |
| H          | -3.70100100 | -0.12494000 | 0.53164800  | C            | 2.95761300  | -0.22898400 | 1.69068700  |
| C          | -4.06095500 | -3.78336000 | -0.70593100 | C            | 2.48270800  | -2.55691400 | 1.31580900  |
| H          | -1.93307400 | -3.91654900 | -0.52089900 | C            | 4.06026000  | -0.57494100 | 2.46336200  |
| C          | -5.19123300 | -2.97666800 | -0.56021900 | H            | 2.70659900  | 0.81788500  | 1.54251000  |
| H          | -5.94535500 | -1.03725000 | 0.00635700  | C            | 3.58700400  | -2.90522800 | 2.09149700  |
| H          | -4.16672900 | -4.81531900 | -1.02548200 | H            | 1.86042200  | -3.34642600 | 0.90893300  |
| H          | -6.17414800 | -3.38213800 | -0.78144700 | C            | 4.38349500  | -1.91592900 | 2.66134500  |
| <b>TS7</b> |             |             |             | H            | 4.66453500  | 0.20634900  | 2.91441000  |
| C          | 2.56731900  | 0.48750800  | -1.33275600 | H            | 3.81727500  | -3.95377900 | 2.25669000  |
| C          | 2.06933900  | 1.80208600  | -1.35633500 | H            | 5.24258500  | -2.18827800 | 3.26730400  |
| C          | 2.91872800  | 2.89822000  | -1.23678500 | C            | -2.50376000 | -1.97831300 | -0.11846800 |
| C          | 4.28692800  | 2.64451300  | -1.13519300 | C            | -3.68888700 | -1.22431100 | -0.18079200 |
| C          | 4.79443700  | 1.34258500  | -1.14813100 | C            | -2.57295400 | -3.37624600 | -0.23536500 |
| C          | 3.92736200  | 0.24924200  | -1.22966100 | C            | -4.90521600 | -1.85068900 | -0.40773500 |
| H          | 2.52832900  | 3.91071000  | -1.23432100 | H            | -3.64082200 | -0.14635800 | -0.05596200 |
| H          | 4.97330200  | 3.48247700  | -1.05283900 | C            | -3.79756300 | -3.99822300 | -0.44876700 |
| H          | 5.86512000  | 1.17915700  | -1.07807000 | H            | -1.68143800 | -3.98211100 | -0.11173800 |
| H          | 4.31566000  | -0.76486500 | -1.19074900 | C            | -4.96170800 | -3.23806700 | -0.54902000 |
| C          | 1.37989600  | -0.41988600 | -1.27104000 | H            | -5.81243400 | -1.25739100 | -0.46397100 |
| C          | 1.39311400  | -1.81602500 | -1.87937700 | H            | -3.84519600 | -5.08021800 | -0.52489000 |
| C          | 0.32280200  | -2.60579800 | -1.09369400 | H            | -5.91564200 | -3.72831000 | -0.71928000 |
| H          | 2.38057900  | -2.26677800 | -1.74480700 | <b>Int11</b> |             |             |             |
| H          | 1.17001700  | -1.79473600 | -2.94952100 | C            | -1.07139700 | -2.25744200 | -0.82351100 |
| H          | 0.69782700  | -3.56571600 | -0.73190400 | C            | 0.29113400  | -2.53808800 | -0.63722400 |
| H          | -0.56949900 | -2.80017200 | -1.69015800 | C            | 0.78072800  | -3.83659500 | -0.60277300 |

|   |             |             |             |            |             |             |             |
|---|-------------|-------------|-------------|------------|-------------|-------------|-------------|
| C | -0.13711500 | -4.87251800 | -0.78260200 | C          | -1.55703400 | 4.14045900  | 0.28075200  |
| C | -1.49191100 | -4.60612000 | -0.99776300 | C          | 0.75052300  | 3.99511400  | -0.38375500 |
| C | -1.97218700 | -3.29369100 | -1.02293900 | C          | -1.51600400 | 5.52272300  | 0.12627100  |
| H | 1.83796200  | -4.03240300 | -0.45238600 | H          | -2.46913300 | 3.64632400  | 0.60070600  |
| H | 0.20939700  | -5.90152500 | -0.76587100 | C          | 0.79275200  | 5.38023800  | -0.53448400 |
| H | -2.18182500 | -5.43102000 | -1.14862700 | H          | 1.65063800  | 3.41839200  | -0.57395500 |
| H | -3.02758600 | -3.09607400 | -1.18468400 | C          | -0.34034000 | 6.14888800  | -0.28401500 |
| C | -1.21696600 | -0.77220400 | -0.79077900 | H          | -2.40559600 | 6.11296400  | 0.32791400  |
| C | -1.94249100 | -0.07423600 | -1.94443400 | H          | 1.71723100  | 5.85639900  | -0.84815600 |
| C | -2.20619500 | 1.34777700  | -1.39921900 | H          | -0.30740200 | 7.22773100  | -0.40511200 |
| H | -2.87805200 | -0.60368600 | -2.15040000 | <b>TS8</b> |             |             |             |
| H | -1.34750400 | -0.07710200 | -2.86276100 | C          | 2.45027800  | -0.12703100 | -1.51679100 |
| H | -3.25825300 | 1.62023800  | -1.51977000 | C          | 2.08687800  | 1.23409300  | -1.64188800 |
| H | -1.62457000 | 2.11482900  | -1.91642100 | C          | 3.03037700  | 2.25656300  | -1.64193600 |
| N | -1.83603000 | 1.33748400  | 0.03036700  | C          | 4.36788100  | 1.88717900  | -1.53384800 |
| N | 1.04293600  | -1.34511400 | -0.52269000 | C          | 4.74793000  | 0.54013000  | -1.42705600 |
| C | 0.22737400  | -0.34883600 | -0.65236100 | C          | 3.79824800  | -0.47614900 | -1.41314400 |
| C | 0.57988200  | 1.08845400  | -0.59065900 | H          | 2.73004300  | 3.29678300  | -1.71796600 |
| H | 1.59252500  | 1.21299100  | -0.19919700 | H          | 5.13316700  | 2.65753700  | -1.53262100 |
| H | 0.56648300  | 1.48357600  | -1.61739300 | H          | 5.80153000  | 0.28997900  | -1.34644000 |
| C | -1.89194000 | -0.05359600 | 0.45298200  | H          | 4.10098800  | -1.51417600 | -1.30963200 |
| C | -0.48092800 | 1.86104900  | 0.24345900  | C          | 1.21486100  | -0.87199500 | -1.42994000 |
| H | -0.25694800 | 1.68067900  | 1.30360900  | C          | 1.00572600  | -2.34531600 | -1.56717500 |
| H | 2.55108000  | -1.34059000 | -0.23640700 | C          | -0.18951100 | -2.80161500 | -0.67981000 |
| O | 3.57414200  | -1.47056700 | -0.04170600 | H          | 1.92299600  | -2.86312100 | -1.26862700 |
| C | 4.15194900  | -0.37277600 | 0.34669800  | H          | 0.80538500  | -2.62156500 | -2.60902400 |
| C | 5.65016600  | -0.61674500 | 0.64485400  | H          | 0.05141400  | -3.72573700 | -0.15248900 |
| O | 3.66285700  | 0.72763000  | 0.48475500  | H          | -1.08241700 | -3.01083300 | -1.27301300 |
| F | 5.79507400  | -1.52553200 | 1.62275500  | N          | -0.53247400 | -1.72099600 | 0.25287900  |
| F | 6.25422900  | 0.50586300  | 1.02918400  | N          | 0.70453900  | 1.32326800  | -1.71719500 |
| F | 6.28225700  | -1.07967000 | -0.44551400 | C          | 0.18220100  | 0.09948800  | -1.61237600 |
| H | -1.26213600 | -0.18569600 | 1.34033000  | C          | -1.26511000 | -0.20252600 | -1.56735900 |
| C | -3.27173400 | -0.55855300 | 0.79871900  | H          | -1.85129800 | 0.71019200  | -1.69625800 |
| C | -3.40462500 | -1.82091700 | 1.38770300  | H          | -1.50742200 | -0.88812400 | -2.38981800 |
| C | -4.41777900 | 0.21349700  | 0.60263700  | C          | 0.53435400  | -0.95344900 | 0.61664600  |
| C | -4.65788200 | -2.31738800 | 1.73134000  | C          | -1.64612500 | -0.88749300 | -0.21240000 |
| H | -2.51866300 | -2.41825800 | 1.58362600  | H          | -1.74682200 | -0.07822700 | 0.51870300  |
| C | -5.67452600 | -0.28301300 | 0.94429400  | H          | 0.12155500  | 2.19973700  | -1.47387500 |
| H | -4.32127200 | 1.22127000  | 0.21450100  | O          | -0.75394200 | 3.27298400  | -0.84595600 |
| C | -5.80061000 | -1.55323200 | 1.49994700  | C          | -1.02985200 | 2.93999700  | 0.33547800  |
| H | -4.74046900 | -3.29916800 | 2.18875200  | C          | -1.84375300 | 3.97900100  | 1.15489300  |
| H | -6.55573000 | 0.33193000  | 0.78499000  | O          | -0.76221600 | 1.88882600  | 0.94047800  |
| H | -6.77994700 | -1.93870200 | 1.76804500  | F          | -2.04086700 | 5.13290500  | 0.50684000  |
| C | -0.42594500 | 3.35905700  | 0.02231500  | F          | -1.22562900 | 4.26903200  | 2.31430200  |

|              |             |             |             |                |             |             |             |
|--------------|-------------|-------------|-------------|----------------|-------------|-------------|-------------|
| F            | -3.05944900 | 3.47852200  | 1.46197200  | C              | -0.79658400 | -1.19285500 | -1.62841400 |
| H            | 0.27956200  | 0.08263000  | 0.85722200  | C              | 0.63602800  | -0.89925700 | -1.92912300 |
| C            | -2.94113100 | -1.66392700 | -0.26094200 | H              | 0.89475000  | -1.13914700 | -2.96835100 |
| C            | -3.20437100 | -2.62694800 | 0.72003600  | H              | 0.79062400  | 0.17694800  | -1.79644900 |
| C            | -3.91889900 | -1.40435900 | -1.22373300 | C              | 1.00571800  | -0.60108900 | 1.04920700  |
| C            | -4.40960500 | -3.32107900 | 0.72916700  | C              | 1.59151500  | -1.67696200 | -1.01716700 |
| H            | -2.45388500 | -2.82583600 | 1.47964700  | H              | 1.60835200  | -2.72587700 | -1.31759600 |
| C            | -5.12971600 | -2.09522200 | -1.21152000 | H              | -1.52067000 | 0.71053100  | -2.14458300 |
| H            | -3.75294100 | -0.65048300 | -1.98698900 | O              | 0.69975400  | 1.96483300  | -0.39067900 |
| C            | -5.37777300 | -3.05862900 | -0.23884000 | C              | -0.16776700 | 2.63685700  | -0.99746200 |
| H            | -4.59506000 | -4.06624900 | 1.49744700  | C              | -0.39086400 | 4.04980700  | -0.38297600 |
| H            | -5.87939500 | -1.87578800 | -1.96605600 | O              | -0.86053900 | 2.34626400  | -1.98562400 |
| H            | -6.31996200 | -3.59854300 | -0.23125200 | F              | -0.72257100 | 3.94402300  | 0.92936800  |
| C            | 1.73649200  | -1.45692300 | 1.28294900  | F              | -1.36315900 | 4.74724000  | -0.97576700 |
| C            | 2.73275700  | -0.51792600 | 1.59577000  | F              | 0.73299300  | 4.79069700  | -0.44244400 |
| C            | 1.92267700  | -2.79284500 | 1.66565300  | H              | 1.37311500  | 0.27869200  | 0.52085800  |
| C            | 3.89682100  | -0.91021500 | 2.24341000  | C              | 0.49804500  | -0.35471600 | 2.38112800  |
| H            | 2.58480900  | 0.52320100  | 1.32288600  | C              | 0.04341300  | 0.95835200  | 2.60246700  |
| C            | 3.08671000  | -3.18046200 | 2.31990100  | C              | 0.48564600  | -1.28610400 | 3.43498300  |
| H            | 1.14141600  | -3.52470000 | 1.49661800  | C              | -0.48714100 | 1.30754600  | 3.83759600  |
| C            | 4.08084100  | -2.24437600 | 2.60177300  | H              | 0.10157500  | 1.67874100  | 1.78885300  |
| H            | 4.65847500  | -0.17105900 | 2.47131200  | C              | -0.01685700 | -0.91555300 | 4.67355600  |
| H            | 3.21236800  | -4.21582800 | 2.62256300  | H              | 0.91205700  | -2.27529800 | 3.30576900  |
| H            | 4.98868300  | -2.55209400 | 3.11217200  | C              | -0.52069700 | 0.37256100  | 4.86986500  |
| <b>Int12</b> |             |             |             | H              | -0.86079500 | 2.31438000  | 3.99388400  |
| C            | -2.76909000 | -2.00090400 | -0.88695500 | H              | -0.01127100 | -1.62814100 | 5.49239600  |
| C            | -2.97268100 | -0.72377000 | -1.47670200 | H              | -0.92360500 | 0.65003000  | 5.83957000  |
| C            | -4.23113800 | -0.12113200 | -1.52318200 | C              | 3.02276300  | -1.19133600 | -1.02270600 |
| C            | -5.29770000 | -0.81866600 | -0.97417500 | C              | 3.35446100  | 0.16538500  | -1.09730300 |
| C            | -5.11938000 | -2.08997500 | -0.39549600 | C              | 4.04686500  | -2.13933500 | -0.93305700 |
| C            | -3.86807500 | -2.68635100 | -0.34744600 | C              | 4.69130700  | 0.55711400  | -1.06885000 |
| H            | -4.36406900 | 0.85958700  | -1.96996400 | H              | 2.58008300  | 0.92702600  | -1.16497200 |
| H            | -6.28958100 | -0.37673000 | -0.99276400 | C              | 5.38144000  | -1.74613900 | -0.90806900 |
| H            | -5.97846700 | -2.61015300 | 0.01841600  | H              | 3.79672200  | -3.19755300 | -0.88978100 |
| H            | -3.74733300 | -3.67013500 | 0.10029300  | C              | 5.70556900  | -0.39259400 | -0.97416100 |
| C            | -1.36535400 | -2.27909800 | -0.99234000 | H              | 4.93563400  | 1.61369500  | -1.12437200 |
| C            | -0.60532500 | -3.41674000 | -0.39186100 | H              | 6.16558900  | -2.49470700 | -0.84314000 |
| C            | 0.31131100  | -2.93368000 | 0.74692700  | H              | 6.74552700  | -0.07998600 | -0.95742600 |
| H            | -0.03111500 | -3.97691000 | -1.13963000 | <b>5a'-TFA</b> |             |             |             |
| H            | -1.29518800 | -4.14204700 | 0.05239800  | C              | 3.84694600  | -0.69900200 | 0.11647700  |
| H            | 1.05043500  | -3.69548000 | 1.02434200  | C              | 4.34869800  | 0.34609400  | -0.69990900 |
| H            | -0.30021000 | -2.69766100 | 1.61706900  | C              | 5.70293400  | 0.46436200  | -1.01488400 |
| N            | 1.02220300  | -1.70363100 | 0.37025900  | C              | 6.56439600  | -0.49278300 | -0.49789400 |
| N            | -1.75989200 | -0.26985400 | -1.93090600 | C              | 6.08912500  | -1.54072500 | 0.31270000  |

|            |             |             |             |   |             |             |             |
|------------|-------------|-------------|-------------|---|-------------|-------------|-------------|
| C          | 4.74265300  | -1.65247000 | 0.62321000  | C | 1.56248500  | -3.18509000 | -2.30420200 |
| H          | 6.07145100  | 1.27133000  | -1.64201500 | C | 0.92009400  | -4.42500000 | -2.28612400 |
| H          | 7.62461900  | -0.43284700 | -0.72452300 | C | -0.37788900 | -4.55635400 | -1.79116900 |
| H          | 6.79170100  | -2.27379900 | 0.69751800  | C | -1.06649000 | -3.45055000 | -1.28305300 |
| H          | 4.38957100  | -2.47018400 | 1.24573600  | H | 2.56475600  | -3.07135400 | -2.70481800 |
| C          | 2.42785700  | -0.50531000 | 0.22941000  | H | 1.43809300  | -5.29689800 | -2.67380900 |
| C          | 1.46119400  | -1.37698200 | 0.96424700  | H | -0.86039500 | -5.52875600 | -1.80153700 |
| C          | 0.47969900  | -0.63105800 | 1.85430500  | H | -2.07786900 | -3.55834400 | -0.90448700 |
| H          | 2.01827100  | -2.06194300 | 1.61212900  | C | -0.88954400 | -0.84562000 | -0.86386600 |
| H          | 0.89301600  | -2.01085000 | 0.26975100  | C | -2.07515800 | -0.34654100 | -1.70939200 |
| H          | 1.00588100  | 0.01894400  | 2.56237200  | C | -2.53145600 | 0.91966800  | -0.96630500 |
| H          | -0.12916400 | -1.34616400 | 2.41449400  | H | -2.84654100 | -1.12326600 | -1.70667500 |
| N          | -0.49541000 | 0.18846800  | 1.09046200  | H | -1.78783400 | -0.16338200 | -2.74884500 |
| N          | 3.27691800  | 1.12850800  | -1.05499000 | H | -3.60695400 | 0.88666600  | -0.76901000 |
| C          | 2.12098100  | 0.61730200  | -0.50152500 | H | -2.34387200 | 1.82767800  | -1.54094800 |
| C          | 0.80067900  | 1.26459000  | -0.74489800 | N | -1.78447600 | 0.97046400  | 0.30395100  |
| H          | 0.94860400  | 2.24746100  | -1.20472500 | N | 1.27394500  | -0.76053700 | -1.72219300 |
| H          | 0.20309300  | 0.67898000  | -1.45689800 | C | 0.34488100  | -0.01142700 | -1.12787100 |
| C          | -0.02968700 | 1.48582500  | 0.52464300  | C | 0.55280400  | 1.25554000  | -0.55866900 |
| H          | 0.60299900  | 1.96579000  | 1.28123700  | H | 1.47208300  | 0.84030300  | 0.30460600  |
| H          | 3.32074700  | 1.94729000  | -1.63812500 | H | 1.23662800  | 1.93174900  | -1.07182800 |
| H          | -0.97442500 | -0.48410600 | 0.29602100  | C | -1.34327100 | -0.39936300 | 0.57349500  |
| H          | -1.30072800 | 0.35762000  | 1.69836500  | C | -0.60415200 | 1.86290300  | 0.24347900  |
| O          | -2.80938500 | -1.43509200 | 1.45858000  | H | -0.26312000 | 1.94394300  | 1.28568700  |
| C          | -2.66468700 | -1.69818700 | 0.26513700  | H | 2.26149500  | -0.46013700 | -1.68962900 |
| C          | -3.74907200 | -2.53963000 | -0.45263400 | O | 3.67473100  | 0.10512500  | -0.74758500 |
| O          | -1.71660000 | -1.33434400 | -0.50750800 | C | 3.51683300  | 0.28449100  | 0.46166500  |
| F          | -4.67150500 | -3.00973200 | 0.38957200  | C | 4.76412700  | 0.24951000  | 1.38006100  |
| F          | -4.38441700 | -1.78326000 | -1.37258900 | O | 2.44078400  | 0.51868300  | 1.10181600  |
| F          | -3.20898400 | -3.58832900 | -1.09613600 | F | 5.85883100  | -0.13936600 | 0.72366200  |
| C          | -1.22754800 | 2.36524000  | 0.25507700  | F | 4.57934700  | -0.59410000 | 2.40792000  |
| C          | -1.29485200 | 3.63652000  | 0.82856300  | F | 4.99923000  | 1.47182900  | 1.88808200  |
| C          | -2.26568400 | 1.93356200  | -0.57838400 | H | -0.47584200 | -0.37080000 | 1.24316800  |
| C          | -2.38101100 | 4.47082500  | 0.57351900  | C | -2.38600600 | -1.27890800 | 1.21784300  |
| H          | -0.49319500 | 3.97642100  | 1.48051400  | C | -2.02106200 | -2.55949400 | 1.64757400  |
| C          | -3.35408600 | 2.76518900  | -0.82509200 | C | -3.68814300 | -0.83656200 | 1.45297400  |
| H          | -2.23543600 | 0.94180100  | -1.02356900 | C | -2.94951000 | -3.39593200 | 2.25881000  |
| C          | -3.41332300 | 4.03495500  | -0.25332200 | H | -0.99875100 | -2.90120400 | 1.50882100  |
| H          | -2.42270600 | 5.45696400  | 1.02649700  | C | -4.62074200 | -1.67428800 | 2.06272300  |
| H          | -4.15944600 | 2.41545500  | -1.46393300 | H | -3.95718100 | 0.18092900  | 1.19074500  |
| H          | -4.26464400 | 4.68048100  | -0.44782700 | C | -4.25851400 | -2.95905600 | 2.45827700  |
| <b>TS9</b> |             |             |             | H | -2.64749200 | -4.38587400 | 2.58877100  |
| C          | -0.42537100 | -2.22077400 | -1.25522700 | H | -5.63069600 | -1.31501200 | 2.23897700  |
| C          | 0.86431100  | -2.10589700 | -1.78727000 | H | -4.98503600 | -3.61000400 | 2.93583900  |

|              |             |             |             |              |             |             |             |
|--------------|-------------|-------------|-------------|--------------|-------------|-------------|-------------|
| C            | -1.01868800 | 3.26124500  | -0.16270200 | F            | 4.25916700  | -1.53121800 | -1.98360400 |
| C            | -1.81066800 | 3.99514500  | 0.72678100  | H            | -0.12793900 | 0.45079300  | -1.15115900 |
| C            | -0.67254500 | 3.83977700  | -1.38388900 | C            | -0.88704600 | 2.41645700  | -1.14532700 |
| C            | -2.24439300 | 5.27587000  | 0.40474000  | C            | 0.28095300  | 3.05708600  | -1.57423300 |
| H            | -2.09117800 | 3.54436900  | 1.67540600  | C            | -2.11438800 | 3.04059600  | -1.37039000 |
| C            | -1.10428600 | 5.12559900  | -1.71075200 | C            | 0.22715000  | 4.31040900  | -2.17534600 |
| H            | -0.06719000 | 3.28569000  | -2.09563400 | H            | 1.24129900  | 2.56660500  | -1.43705100 |
| C            | -1.89041600 | 5.84706200  | -0.81814600 | C            | -2.17110400 | 4.29792500  | -1.96998800 |
| H            | -2.85591700 | 5.83254100  | 1.10915000  | H            | -3.02977600 | 2.52327900  | -1.10496300 |
| H            | -0.82352300 | 5.56078100  | -2.66561300 | C            | -1.00157100 | 4.94120600  | -2.36616000 |
| H            | -2.22410700 | 6.84942900  | -1.07017300 | H            | 1.14482700  | 4.79093600  | -2.50276300 |
| <b>Int13</b> |             |             |             | H            | -3.13524600 | 4.76994100  | -2.13712600 |
| C            | 1.06144900  | 1.68894400  | 1.40519600  | H            | -1.04698100 | 5.91946800  | -2.83596300 |
| C            | 1.85131300  | 0.71627900  | 2.03578000  | C            | -3.09766800 | -1.83986800 | 0.01158800  |
| C            | 3.07843800  | 1.02066900  | 2.60860400  | C            | -4.12904800 | -1.73141600 | -0.92720900 |
| C            | 3.50750200  | 2.34885100  | 2.55065400  | C            | -3.30393300 | -2.61666600 | 1.15097200  |
| C            | 2.71853600  | 3.33603300  | 1.96193800  | C            | -5.33924000 | -2.38614700 | -0.73088900 |
| C            | 1.48073600  | 3.01069400  | 1.39654500  | H            | -3.97433200 | -1.11404700 | -1.80845300 |
| H            | 3.68173500  | 0.25600400  | 3.08864800  | C            | -4.51694400 | -3.27722900 | 1.35022700  |
| H            | 4.46751400  | 2.61452900  | 2.98353700  | H            | -2.51658500 | -2.69894400 | 1.89511600  |
| H            | 3.06471200  | 4.36470300  | 1.94294200  | C            | -5.53683600 | -3.16450100 | 0.41080500  |
| H            | 0.86515900  | 3.78312900  | 0.94626500  | H            | -6.13090400 | -2.29200900 | -1.46893900 |
| C            | -0.21973600 | 1.03821800  | 0.95718300  | H            | -4.66228300 | -3.87800600 | 2.24363500  |
| C            | -1.45737500 | 1.51764100  | 1.73144000  | H            | -6.48111200 | -3.67881900 | 0.56454900  |
| C            | -2.61593500 | 0.87780000  | 0.94907600  | H            | 1.70294600  | -1.39135600 | 2.08351400  |
| H            | -1.49335000 | 2.61165600  | 1.69501800  | <b>Int14</b> |             |             |             |
| H            | -1.42444700 | 1.21334000  | 2.78129500  | C            | -3.29561200 | 0.34553200  | -0.00064700 |
| H            | -3.40538000 | 1.60622300  | 0.74084400  | C            | -3.93212200 | 1.34603400  | -0.74965200 |
| H            | -3.07903600 | 0.05896800  | 1.50209500  | C            | -5.28182400 | 1.26829900  | -1.06664700 |
| N            | -2.05053100 | 0.36108700  | -0.31749500 | C            | -5.99003100 | 0.15128200  | -0.61530000 |
| N            | 1.19344000  | -0.51885000 | 2.01748400  | C            | -5.37185500 | -0.84410600 | 0.13991200  |
| C            | 0.05742500  | -0.43509700 | 1.24504900  | C            | -4.01358500 | -0.74518100 | 0.46110600  |
| C            | -0.66291900 | -1.43669700 | 0.68793700  | H            | -5.77391600 | 2.04486400  | -1.64474800 |
| H            | -0.43628800 | -2.47994300 | 0.90135200  | H            | -7.04512100 | 0.06298900  | -0.85759400 |
| C            | -0.77127600 | 1.05680300  | -0.50343500 | H            | -5.94522200 | -1.70090100 | 0.47895900  |
| C            | -1.80394000 | -1.09447100 | -0.25297300 | H            | -3.52655800 | -1.51864700 | 1.04737300  |
| H            | -1.50363100 | -1.38096300 | -1.27467700 | C            | -1.86933300 | 0.76232300  | 0.22161200  |
| H            | 0.89094000  | -1.54986500 | -0.47816100 | C            | -1.53104700 | 1.12932900  | 1.67679600  |
| O            | 1.64315900  | -1.72349500 | -1.11555000 | C            | -0.00591600 | 1.27392700  | 1.65668900  |
| C            | 2.60921000  | -2.36750900 | -0.50242600 | H            | -1.85481100 | 0.31887100  | 2.33709500  |
| C            | 3.76453900  | -2.67073900 | -1.48145900 | H            | -2.03501700 | 2.04703300  | 1.98902900  |
| O            | 2.64969900  | -2.70243200 | 0.65732300  | H            | 0.49534100  | 0.73398700  | 2.46186400  |
| F            | 3.32866500  | -3.42420800 | -2.49978200 | H            | 0.32120000  | 2.31186000  | 1.70749600  |
| F            | 4.74496600  | -3.32073900 | -0.86357100 | N            | 0.43866300  | 0.70034100  | 0.34733700  |

---

|             |             |             |             |   |             |             |             |
|-------------|-------------|-------------|-------------|---|-------------|-------------|-------------|
| N           | -3.02215000 | 2.36208900  | -1.05902700 | C | 2.54160300  | -4.25870700 | 0.23069400  |
| C           | -1.74044500 | 1.97516500  | -0.69283300 | C | 2.68984900  | -2.86655000 | 0.26598200  |
| C           | -0.55357100 | 2.44508800  | -1.09875900 | H | -0.82159500 | -4.48746200 | -0.37630100 |
| H           | -0.47292500 | 3.25670400  | -1.81612300 | H | 1.19354400  | -5.91426300 | -0.01277500 |
| C           | -0.69172300 | -0.15572500 | -0.15524300 | H | 3.40626100  | -4.89504300 | 0.39131300  |
| C           | 0.72786100  | 1.77363400  | -0.68124400 | H | 3.65994700  | -2.42300800 | 0.46867400  |
| H           | 1.14878600  | 1.20430400  | -1.52247900 | C | 1.33408100  | -0.59625100 | 0.14464900  |
| H           | 1.36848000  | 0.04980700  | 0.43875400  | C | 1.29184300  | -0.16584900 | 1.63291900  |
| O           | 1.82858900  | -1.09725400 | -1.69359600 | C | 1.22038500  | 1.35811900  | 1.56832800  |
| C           | 2.43219000  | -1.42924200 | -0.67323400 | H | 2.20911400  | -0.51372700 | 2.11836500  |
| C           | 3.32103300  | -2.69776300 | -0.71354100 | H | 0.43781600  | -0.60476900 | 2.15346500  |
| O           | 2.42600700  | -0.86119300 | 0.46491800  | H | 1.84716000  | 1.85723600  | 2.31260600  |
| F           | 3.34017500  | -3.27258600 | -1.92000400 | H | 0.19041500  | 1.71199600  | 1.69456600  |
| F           | 2.87756300  | -3.61607800 | 0.16608800  | N | 1.65327200  | 1.68506800  | 0.19830400  |
| F           | 4.59429200  | -2.40482000 | -0.38413800 | N | -0.64582900 | -1.68970900 | -0.40687300 |
| H           | -0.57734200 | -0.22253800 | -1.23792500 | C | -0.09736000 | -0.46712000 | -0.38284800 |
| C           | -0.74461300 | -1.56000400 | 0.38247300  | C | -0.72625300 | 0.73560300  | -0.60368200 |
| C           | -1.25106100 | -2.53404000 | -0.48427800 | H | -1.81323700 | 0.75609100  | -0.50715600 |
| C           | -0.37236100 | -1.94388400 | 1.67275300  | C | 2.24161400  | 0.49228000  | -0.45855100 |
| C           | -1.40614500 | -3.85176900 | -0.06881900 | C | -0.00109900 | 1.93590800  | -0.86250300 |
| H           | -1.51840800 | -2.25405500 | -1.49949400 | H | 0.65054300  | 1.99082500  | -1.73806900 |
| C           | -0.51770100 | -3.26483500 | 2.08855800  | H | 2.22987000  | 2.51874600  | 0.12500500  |
| H           | 0.07062400  | -1.23303900 | 2.35988500  | O | -3.19521300 | -2.04210800 | -0.57137500 |
| C           | -1.04231700 | -4.22117800 | 1.22396400  | C | -3.89393200 | -1.09994900 | -0.11042400 |
| H           | -1.79634000 | -4.59182800 | -0.76099100 | C | -5.40601900 | -1.43289500 | 0.03851500  |
| H           | -0.20421300 | -3.54696400 | 3.08910800  | O | -3.55624500 | 0.02834600  | 0.27062900  |
| H           | -1.14829600 | -5.25176100 | 1.54925400  | F | -5.80831500 | -2.44314300 | -0.74644400 |
| C           | 1.80236700  | 2.71612100  | -0.17871900 | F | -6.18341000 | -0.37447500 | -0.24680400 |
| C           | 3.12864500  | 2.27583500  | -0.11939000 | F | -5.67365300 | -1.79030800 | 1.31548000  |
| C           | 1.50129700  | 4.01853800  | 0.22704500  | H | 2.05933500  | 0.57018500  | -1.53617200 |
| C           | 4.13006100  | 3.12025000  | 0.34906900  | C | 3.72473200  | 0.30998500  | -0.26131400 |
| H           | 3.37179600  | 1.26240000  | -0.42408900 | C | 4.44420000  | -0.34835900 | -1.26387700 |
| C           | 2.50451700  | 4.86618500  | 0.69272800  | C | 4.40365100  | 0.74064700  | 0.88116400  |
| H           | 0.47355300  | 4.36915100  | 0.17491200  | C | 5.80630800  | -0.58962200 | -1.12088200 |
| C           | 3.82122500  | 4.41759300  | 0.75601200  | H | 3.92544700  | -0.68807500 | -2.15707700 |
| H           | 5.15467200  | 2.76324500  | 0.39376200  | C | 5.77013500  | 0.50642500  | 1.02360700  |
| H           | 2.25614600  | 5.87691700  | 1.00372500  | H | 3.87433300  | 1.26267200  | 1.67263800  |
| H           | 4.60521800  | 5.07686600  | 1.11726500  | C | 6.47365300  | -0.16372400 | 0.02662200  |
| H           | -3.17587400 | 2.98820800  | -1.83374100 | H | 6.34742700  | -1.10781600 | -1.90690300 |
| <b>TS10</b> |             |             |             | H | 6.28334100  | 0.84710100  | 1.91796200  |
| C           | 1.57686800  | -2.07575500 | 0.03536000  | H | 7.53759500  | -0.34849600 | 0.13991100  |
| C           | 0.32050200  | -2.66716200 | -0.19211700 | C | -0.59183100 | 3.23256500  | -0.50754700 |
| C           | 0.15535900  | -4.04653200 | -0.20647900 | C | -0.02405100 | 4.41092800  | -1.01507500 |
| C           | 1.29048600  | -4.83256300 | 0.00155200  | C | -1.68820100 | 3.32082500  | 0.36420200  |

|              |             |             |             |             |             |             |             |
|--------------|-------------|-------------|-------------|-------------|-------------|-------------|-------------|
| C            | -0.53407100 | 5.65316500  | -0.66024200 | C           | 2.40028300  | -0.83469500 | 1.52017400  |
| H            | 0.81750500  | 4.34448100  | -1.70230000 | C           | 1.40969900  | -0.08116000 | 2.15834300  |
| C            | -2.20255900 | 4.56566600  | 0.71037700  | C           | 3.73803900  | -0.58424300 | 1.83095500  |
| H            | -2.15436900 | 2.41514700  | 0.74403400  | C           | 1.74763600  | 0.92065700  | 3.06256800  |
| C            | -1.62552300 | 5.73043400  | 0.20593200  | H           | 0.36196600  | -0.27872000 | 1.94462400  |
| H            | -0.09063200 | 6.55930300  | -1.06203400 | C           | 4.07865000  | 0.41069300  | 2.74332400  |
| H            | -3.06175100 | 4.62486900  | 1.37139600  | H           | 4.53212300  | -1.16385700 | 1.36978100  |
| H            | -2.03093300 | 6.69980700  | 0.48109900  | C           | 3.08596700  | 1.17234000  | 3.35489900  |
| H            | -1.71537800 | -1.85095600 | -0.53256600 | H           | 0.96371500  | 1.50160700  | 3.53903900  |
| <b>Int15</b> |             |             |             | H           | 5.12436800  | 0.59181900  | 2.97409200  |
| C            | 2.58402200  | -0.08296900 | -1.27128900 | H           | 3.35358600  | 1.95295900  | 4.06075500  |
| C            | 1.87030000  | 1.11755600  | -1.19544400 | C           | -2.64723500 | -2.75049600 | -0.11914800 |
| C            | 2.46548500  | 2.36057600  | -1.36179000 | C           | -2.84524200 | -4.13748000 | -0.01930200 |
| C            | 3.83427100  | 2.37261300  | -1.62748600 | C           | -3.74045800 | -1.89030500 | 0.09857600  |
| C            | 4.56012900  | 1.18295300  | -1.73281200 | C           | -4.09732800 | -4.65949800 | 0.28208100  |
| C            | 3.93936400  | -0.05803100 | -1.55860600 | H           | -2.00370300 | -4.80721900 | -0.18154800 |
| H            | 1.88343100  | 3.27377800  | -1.28991700 | C           | -4.98811200 | -2.41707500 | 0.40027100  |
| H            | 4.34204800  | 3.32208600  | -1.76597900 | H           | -3.61647300 | -0.81240500 | 0.03885500  |
| H            | 5.62165800  | 1.22337400  | -1.95737100 | C           | -5.17261900 | -3.79854500 | 0.49239700  |
| H            | 4.51670200  | -0.97361500 | -1.65945600 | H           | -4.23441200 | -5.73421000 | 0.35502800  |
| C            | 1.63336900  | -1.20011200 | -0.95536700 | H           | -5.82387900 | -1.74452400 | 0.56799700  |
| C            | 1.74188400  | -2.42741400 | -1.88410700 | H           | -6.15298100 | -4.20100900 | 0.73026400  |
| C            | 2.35772600  | -3.54299600 | -0.99770800 | H           | -0.28792600 | 1.68356000  | -0.79683200 |
| H            | 2.39344100  | -2.18380900 | -2.72760200 | <b>TS11</b> |             |             |             |
| H            | 0.77389400  | -2.71306000 | -2.30354700 | C           | 2.37153200  | -1.51326400 | -1.13470000 |
| H            | 3.12972300  | -4.12074600 | -1.51158600 | C           | 2.16672800  | -0.14770400 | -1.41523300 |
| H            | 1.57849800  | -4.24945500 | -0.68529800 | C           | 3.21665600  | 0.73659800  | -1.63895300 |
| N            | 2.89831100  | -2.90548100 | 0.19342200  | C           | 4.50447100  | 0.21122000  | -1.59451700 |
| N            | 0.52346000  | 0.84069200  | -0.95364100 | C           | 4.72890300  | -1.14948400 | -1.33894100 |
| C            | 0.32498500  | -0.45712700 | -0.86627400 | C           | 3.66856700  | -2.02329300 | -1.10430500 |
| C            | -0.98760900 | -0.95496800 | -0.59910200 | H           | 3.02940900  | 1.78811800  | -1.83097400 |
| H            | -1.74802300 | -0.17970600 | -0.49731400 | H           | 5.35273600  | 0.86679400  | -1.76618600 |
| C            | 1.97747900  | -1.84094600 | 0.48973100  | H           | 5.74721500  | -1.52670100 | -1.32605300 |
| C            | -1.31709600 | -2.25911500 | -0.43644900 | H           | 3.85749700  | -3.07724900 | -0.91289000 |
| H            | -0.55569500 | -3.03027000 | -0.53934300 | C           | 1.07085700  | -2.07973300 | -0.81913700 |
| H            | 3.82673700  | -2.53812500 | 0.01033300  | C           | 0.84678100  | -3.56515500 | -0.80106600 |
| O            | -1.05377300 | 2.73177500  | -0.61501600 | C           | 0.77104900  | -4.07910200 | 0.67172100  |
| C            | -2.26379400 | 2.54543700  | -0.26955700 | H           | 1.68902900  | -4.04540100 | -1.30930000 |
| C            | -3.01732100 | 3.87914800  | -0.02329000 | H           | -0.05096300 | -3.85192700 | -1.35538900 |
| O            | -2.87507100 | 1.49177000  | -0.10728300 | H           | 1.20826400  | -5.07218700 | 0.79281100  |
| F            | -2.97708900 | 4.66706300  | -1.11286300 | H           | -0.27413000 | -4.13557400 | 0.99559300  |
| F            | -2.45131900 | 4.56184700  | 0.99099700  | N           | 1.44739900  | -3.12416200 | 1.52262400  |
| F            | -4.30238900 | 3.68673200  | 0.28885500  | N           | 0.80828100  | 0.10251800  | -1.38921400 |
| H            | 1.04189900  | -2.30286600 | 0.82854100  | C           | 0.13046900  | -1.01569400 | -1.09505700 |

|              |             |             |             |   |             |             |             |
|--------------|-------------|-------------|-------------|---|-------------|-------------|-------------|
| C            | -1.29136300 | -0.93314600 | -0.91656100 | H | -5.41831300 | 2.14446200  | -1.08278800 |
| H            | -1.69587400 | 0.06845500  | -1.03389100 | H | -7.34844900 | 0.69638100  | -0.50220900 |
| C            | 1.00827200  | -1.85643800 | 1.25938100  | H | -7.04119900 | -1.71323400 | -0.05596900 |
| C            | -2.10582600 | -1.93249300 | -0.51050900 | H | -4.79940400 | -2.75588700 | -0.19894800 |
| H            | -1.71701800 | -2.94256200 | -0.39764600 | C | -2.41719900 | -1.15428300 | -0.87976800 |
| H            | 2.45496100  | -3.22740200 | 1.55234500  | C | -1.72805500 | -2.44089600 | -0.59848400 |
| O            | -0.06522300 | 2.51736700  | -1.34415200 | C | -1.53335900 | -2.66191900 | 0.92499100  |
| C            | -0.95426700 | 2.75059100  | -0.48135300 | H | -0.74251800 | -2.48565800 | -1.07073000 |
| C            | -1.16003500 | 4.25924500  | -0.17213500 | H | -2.31766900 | -3.28499000 | -0.97498200 |
| O            | -1.63711000 | 1.95693400  | 0.17854200  | H | -0.99455000 | -3.59493900 | 1.10421900  |
| F            | -0.90341800 | 5.05168700  | -1.22113000 | H | -2.50438800 | -2.70460500 | 1.42990500  |
| F            | -0.31679200 | 4.63079200  | 0.82453800  | N | -0.75001400 | -1.57596200 | 1.47067600  |
| F            | -2.40436900 | 4.53048700  | 0.24334700  | N | -2.78639100 | 1.04187300  | -1.21795500 |
| H            | -0.07818200 | -1.77120200 | 1.29274300  | C | -1.81063200 | 0.06300200  | -1.18237200 |
| C            | 1.73253900  | -0.65406900 | 1.64435800  | C | -0.40855400 | 0.34230900  | -1.35313400 |
| C            | 1.02979800  | 0.56114500  | 1.63785000  | H | 0.23157100  | -0.53435500 | -1.42687600 |
| C            | 3.10906600  | -0.65063600 | 1.91866100  | C | -1.30560300 | -0.43808000 | 1.72102600  |
| C            | 1.69437100  | 1.75697300  | 1.88772700  | C | 0.13233400  | 1.57910800  | -1.32592600 |
| H            | -0.03433800 | 0.58328800  | 1.41233600  | H | -0.51850300 | 2.44135300  | -1.17354500 |
| C            | 3.76656200  | 0.54398100  | 2.17015100  | H | 0.34427100  | -1.71734500 | 1.41454900  |
| H            | 3.67975700  | -1.57466000 | 1.91763600  | O | 1.58196200  | -2.23869800 | -0.89117400 |
| C            | 3.06213200  | 1.74973400  | 2.14741600  | C | 2.20759300  | -2.16917000 | 0.16864600  |
| H            | 1.14223800  | 2.69101200  | 1.86329200  | C | 3.75151800  | -2.32861100 | 0.11001500  |
| H            | 4.83339200  | 0.53978900  | 2.37160000  | O | 1.77230200  | -1.98809400 | 1.34409900  |
| H            | 3.58365900  | 2.68442600  | 2.33170300  | F | 4.22727200  | -2.22427300 | -1.13901900 |
| C            | -3.52014400 | -1.76987800 | -0.20044000 | F | 4.12033800  | -3.53421000 | 0.58328100  |
| C            | -4.33612900 | -2.90840400 | -0.11195800 | F | 4.37453000  | -1.39536700 | 0.85229000  |
| C            | -4.08961300 | -0.50537300 | 0.03558500  | H | -2.39614800 | -0.40599900 | 1.70653400  |
| C            | -5.69236300 | -2.79267900 | 0.17059400  | C | -0.62221700 | 0.80675200  | 1.99827800  |
| H            | -3.89994000 | -3.89064500 | -0.28035200 | C | -1.42334700 | 1.95310900  | 2.11713000  |
| C            | -5.44402300 | -0.39607100 | 0.32170800  | C | 0.77690800  | 0.92269800  | 2.06222600  |
| H            | -3.46658000 | 0.38607000  | 0.02830000  | C | -0.83806800 | 3.20082500  | 2.29372200  |
| C            | -6.25067500 | -1.53381600 | 0.38466000  | H | -2.50459600 | 1.85844100  | 2.05247500  |
| H            | -6.31260200 | -3.68245600 | 0.22650800  | C | 1.35245400  | 2.17189400  | 2.24040100  |
| H            | -5.87109600 | 0.58459800  | 0.50929700  | H | 1.40807800  | 0.04437200  | 1.95759800  |
| H            | -7.30867900 | -1.43900800 | 0.61119400  | C | 0.55061600  | 3.30884800  | 2.35463500  |
| H            | 0.37547800  | 1.10648300  | -1.41214000 | H | -1.46084100 | 4.08570300  | 2.38360900  |
| <b>Int16</b> |             |             |             | H | 2.43351100  | 2.26229300  | 2.27091000  |
| C            | -3.81815800 | -0.89215900 | -0.71676300 | H | 1.01220600  | 4.28328000  | 2.48654600  |
| C            | -4.01706300 | 0.49308600  | -0.95219500 | C | 1.55081200  | 1.90545100  | -1.40133500 |
| C            | -5.27808600 | 1.08490900  | -0.88805100 | C | 2.54426600  | 0.94120400  | -1.64307900 |
| C            | -6.35294400 | 0.26693700  | -0.56201600 | C | 1.94926200  | 3.23336800  | -1.18266100 |
| C            | -6.17753100 | -1.10561100 | -0.30850600 | C | 3.88626900  | 1.29721700  | -1.64142700 |
| C            | -4.92228700 | -1.69184100 | -0.38355300 | H | 2.27026100  | -0.09376800 | -1.82460800 |

---

|               |             |             |             |   |             |             |             |
|---------------|-------------|-------------|-------------|---|-------------|-------------|-------------|
| C             | 3.29383900  | 3.58978200  | -1.18835000 | H | 0.56728700  | -1.66058500 | 1.11581700  |
| H             | 1.19003600  | 3.98960700  | -0.99513200 | H | -0.74274500 | -2.51689100 | 2.36082300  |
| C             | 4.26907600  | 2.62049600  | -1.41295000 | O | 1.57931900  | -1.43971700 | 0.73464600  |
| H             | 4.63783100  | 0.53334100  | -1.81659200 | H | -1.26134700 | -1.07582300 | 1.76196800  |
| H             | 3.58030900  | 4.62357700  | -1.01592300 | C | 2.15629100  | -2.52105000 | 0.30321600  |
| H             | 5.32064600  | 2.89222900  | -1.41387100 | C | 3.55196400  | -2.21034900 | -0.28685400 |
| H             | -2.63174600 | 1.98280300  | -1.53858600 | F | 3.42097900  | -1.47404700 | -1.40655100 |
| <b>5a-TFA</b> |             |             |             | F | 4.21360800  | -3.32170600 | -0.59660700 |
| C             | -3.75041900 | -0.30604300 | -0.32876400 | F | 4.30007600  | -1.50419800 | 0.57740200  |
| C             | -4.02147600 | 1.04759200  | -0.00114300 | O | 1.71711900  | -3.65130600 | 0.30258800  |
| C             | -5.31915600 | 1.51839000  | 0.20041600  |   |             |             |             |
| C             | -6.35805100 | 0.60678600  | 0.06757700  |   |             |             |             |
| C             | -6.11347200 | -0.73962600 | -0.26193600 |   |             |             |             |
| C             | -4.82210300 | -1.20296600 | -0.46165400 |   |             |             |             |
| H             | -5.51325200 | 2.55781900  | 0.44934400  |   |             |             |             |
| H             | -7.38032200 | 0.94070700  | 0.21785300  |   |             |             |             |
| H             | -6.95204300 | -1.42200500 | -0.36266000 |   |             |             |             |
| H             | -4.64460200 | -2.24309700 | -0.72190700 |   |             |             |             |
| C             | -2.32916700 | -0.43303600 | -0.46377900 |   |             |             |             |
| C             | -1.59261900 | -1.69572100 | -0.77493400 |   |             |             |             |
| C             | -1.47837800 | -2.62563700 | 0.43489500  |   |             |             |             |
| H             | -0.58957600 | -1.47509100 | -1.15467000 |   |             |             |             |
| H             | -2.10953600 | -2.24056700 | -1.57387700 |   |             |             |             |
| H             | -0.89419600 | -3.51298300 | 0.17469400  |   |             |             |             |
| H             | -2.47714300 | -2.94151800 | 0.75983000  |   |             |             |             |
| N             | -0.76827300 | -1.93675200 | 1.52668700  |   |             |             |             |
| N             | -2.81714000 | 1.70053700  | 0.05915500  |   |             |             |             |
| C             | -1.78455000 | 0.82098000  | -0.21302200 |   |             |             |             |
| C             | -0.39701100 | 1.20607400  | -0.20914700 |   |             |             |             |
| H             | 0.30283000  | 0.39530700  | -0.38841700 |   |             |             |             |
| C             | 0.08769400  | 2.44866000  | -0.00173900 |   |             |             |             |
| H             | -0.60428800 | 3.27971100  | 0.14052200  |   |             |             |             |
| H             | -2.69774400 | 2.67248800  | 0.28632100  |   |             |             |             |
| C             | 1.49885800  | 2.82046700  | 0.03153100  |   |             |             |             |
| C             | 1.84842100  | 4.17927200  | -0.00454700 |   |             |             |             |
| C             | 2.53039900  | 1.86845900  | 0.10631200  |   |             |             |             |
| C             | 3.18112100  | 4.57776900  | 0.00980200  |   |             |             |             |
| H             | 1.06182900  | 4.92903200  | -0.05337900 |   |             |             |             |
| C             | 3.85986700  | 2.26798800  | 0.11973600  |   |             |             |             |
| H             | 2.29459500  | 0.81159000  | 0.17764700  |   |             |             |             |
| C             | 4.19352700  | 3.62260800  | 0.06834700  |   |             |             |             |
| H             | 3.42892500  | 5.63485400  | -0.02452900 |   |             |             |             |
| H             | 4.64013800  | 1.51481400  | 0.18017300  |   |             |             |             |
| H             | 5.23516800  | 3.92979700  | 0.08160100  |   |             |             |             |

---

## References for calculations

- (1) Frisch, M. J.; Trucks, G. W.; Schlegel, H. B.; Scuseria, G. E.; Robb, M. A.; Cheeseman, J. R.; Scalmani, G.; Barone, V.; Mennucci, B.; Petersson, G. A.; Nakatsuji, H.; Caricato, M.; Li, X.; Hratchian, H. P.; Izmaylov, A. F.; Bloino, J.; Zheng, G.; Sonnenberg, J. L.; Hada, M.; Ehara, M.; Toyota, K.; Fukuda, R.; Hasegawa, J.; Ishida, M.; Nakajima, T.; Honda, Y.; Kitao, O.; Nakai, H.; Vreven, T.; Montgomery, J. A.; Peralta, Jr., J. E.; Ogliaro, F.; Bearpark, M.; Heyd, J. J.; Brothers, E.; Kudin, K. N.; Staroverov, V. N.; Keith, T.; Kobayashi, R.; Normand, J.; Raghavachari, K.; Rendell, A.; Burant, J. C.; Iyengar, S. S.; Tomasi, J.; Cossi, M.; Rega, N.; Millam, J. M.; Klene, M.; Knox, J. E.; Cross, J. B.; Bakken, V.; Adamo, C.; Jaramillo, J.; Gomperts, R.; Stratmann, R. E.; Yazyev, O.; Austin, A. J.; Cammi, R.; Pomelli, C.; Ochterski, J. W.; Martin, R. L.; Morokuma, K.; Zakrzewski, V. G.; Voth, G. A.; Salvador, P.; Dannenberg, J. J.; Dapprich, S.; Daniels, A. D.; Farkas, Ö.; Foresman, J. B.; Ortiz, J. V.; Cioslowski, J.; Fox, D. J. *Gaussian 09, Revision E.01*, Gaussian, Inc., Wallingford, CT, **2013**.
- (2) Adamo, C.; Barone, V. *J. Chem. Phys.* **1999**, *110*, 6158-6170.
- (3) Zheng, C.; Xia, Z.-L.; You, S.-L. *Chem* **2018**, *4*, 1952-1966.
- (4) (a) Grimme, S.; Antony, J.; Ehrlich, S.; Krieg, H. *J. Chem. Phys.* **2010**, *132*, 154104. (b) Grimme, S.; Ehrlich, S.; Goerigk, L. *J. Comput. Chem.* **2011**, *32*, 1456-1465.
- (5) Hehre, W. J.; Radom, L.; Schleyer, P. V. R.; Pople, J. A. *Ab Initio Molecular Orbital Theory*; Wiley: New York, **1986**.
- (6) Marenich, A. V.; Cramer, C. J.; Truhlar, D. G. *J. Phys. Chem. B*, **2009**, *113*, 6378–6396.
